# Supplementary material
Source: ML conference proceedings conference paper supplement (https://proceedings.neurips.cc/paper_files/paper/2023/hash/6a6ecedac816a24f92ad1f444b1edcb0-Abstract.html)
Supplement: Supplementary file 1 [file 6a6ecedac816a24f92ad1f444b1edcb0-Supplemental-Conference.pdf]

---

# Supplementary Material: Scale-teaching: Robust Multi-scale Training for Time Series Classification with Noisy Labels

---

**Zhen Liu**

South China University of Technology  
Guangzhou, China  
cszhenliu@mail.scut.edu.cn

**Peitian Ma**

South China University of Technology  
Guangzhou, China  
ma\_scuter@163.com

**Dongliang Chen**

South China University of Technology  
Guangzhou, China  
ytucdl@foxmail.com

**Wenbin Pei**

Dalian University of Technology  
Dalian, China  
peiwenbin@dlut.edu.cn

**Qianli Ma\***

South China University of Technology  
Guangzhou, China  
qianlima@scut.edu.cn

## A Small-loss Criterion

DNNs have been widely known to first learn simple and generalized patterns, which is achieved by learning clean data. After that, the networks gradually overfit noisy ones. In other words, when we train a model with a dataset containing incorrectly labeled samples, we can consider the samples with small training losses as clean ones and use them to update the model. Formally, let  $f^*$  be the target concept which determines the true label of  $x$  and model  $g^* = g(x; \Theta^*)$  minimizing the expected loss, i.e.,

$$\Theta^* = \arg \min_{\Theta} \mathbb{E}_{(x, \tilde{y})} [\ell_{CE}(g(x; \Theta), \tilde{y})]. \quad (1)$$

Then, the small-loss criterion can be stated as follows[1]:

**Theorem 1.** *Suppose  $g$  is  $\epsilon$ -close to  $g^*$ , i.e.,  $\|g - g^*\|_{\infty} = \epsilon$ , for two examples  $(x_1, \tilde{y})$  and  $(x_2, \tilde{y})$ , assume  $f^*(x_1) = \tilde{y}$  and  $f^*(x_2) \neq \tilde{y}$ , if  $T$  satisfies the diagonally-dominant condition  $T_{ii} > \max\{\max_{j \neq i} T_{ij}, \max_{j \neq i} T_{ji}\}, \forall i$ , and  $\epsilon < \frac{1}{2} \cdot (T_{\tilde{y}\tilde{y}} - T_{f^*(x_2)\tilde{y}})$ , then  $\ell_{CE}(g(x_1), \tilde{y}) < \ell_{CE}(g(x_2), \tilde{y})$ .*

The work [1] provides the proof of this theorem. It shows that during training, the model can select clean samples according to the loss values. The reason is that the loss values of clean samples among the samples with the same observed labels are smaller. It is worth noting that the theorem is under the assumption of the class-dependent noise type and requires the transition matrix to satisfy the diagonally-dominant condition. Additionally, the finite data may also make the conditions of the theorem difficult to hold because the model  $g$  may be far away from  $g^*$ .

---

\*Qianli Ma is the corresponding author.

Table 1: A summary of four individual large time series datasets used in the experiments.

| Dataset     | # Train | # Test | Length | # Variables | # Classes |
|-------------|---------|--------|--------|-------------|-----------|
| HAR         | 7352    | 2947   | 128    | 9           | 6         |
| Sleep-EDF   | 25612   | 8910   | 3000   | 1           | 5         |
| FD-A        | 8184    | 2728   | 5120   | 1           | 3         |
| UniMiB-SHAR | 9416    | 2354   | 453    | 1           | 17        |

## B Dataset Information

To evaluate the robustness of our proposed Scale-teaching and baselines on the time-series label-noise learning task, we selected three benchmark time-series datasets for experimental analysis.

### B.1 Four individual large datasets

The statistical information of the four individual time series datasets is shown in Table 1. And the specific dataset information is as follows:

#### Human Activity Recognition (HAR)

The HAR dataset [2, 3] is collected from 30 students performing six human actions (i.e., walking, walking upstairs, downstairs, standing, sitting, and lying down) by wearing sensors.

#### University of Milano Bicocca Smartphone-based Human Activity Recognition (UniMiB SHAR)

The UniMiB SHAR dataset [4, 5] is human activity information collected at a sampling rate of 50 Hz from volunteers with a smartphone with an accelerometer sensor in the front pocket of their pants. Specifically, each accelerometer entry is labeled by specifying the type of ADL (e.g., walking, sitting, or standing) or the type of fall (e.g., forward, fainting, or backward).

#### Faulty Detection Condition A (FD-A)

The FD-A dataset [2, 6] is generated by an electromechanical drive system that monitors the condition of rolling bearings and detects their failure. Each rolling bearing can be classified into three categories: undamaged, inner damaged, and externally damaged.

#### Sleep Stage EEG Signal Classification (Sleep-EDF)

The Sleep-EDF dataset [2, 7] includes the whole night PSG sleep recordings, which contain five EEG sleep signal recordings: Wake (W), Non-rapid eye movement (N1, N2, N3), and Rapid Eye Movement (REM).

### B.2 UCR 128 Archive

The UCR time series archive [8] contains 128 univariate datasets and is widely used for classification in the time series mining community. Each UCR dataset includes a single training set and a single test set, and each time series sample has been z-normalized. In addition, we uniformly use the mean-imputation method to preprocess the datasets that contain missing values. For detailed information about UCR datasets, please refer to [https://www.cs.ucr.edu/~eamonn/time\\_series\\_data\\_2018/](https://www.cs.ucr.edu/~eamonn/time_series_data_2018/).

### B.3 UEA 30 Archive

The UEA time series archive [9] contains 30 multivariate datasets, mainly derived from Human Activity Recognition, Motion classification, ECG classification, EEG/MEG classification, Audio Spectra Classification, and other realistic scenarios. Each dataset contains a partitioned training set and a test set. In addition, we use the mean-imputation method to deal with datasets with missing values. For detailed information about UEA datasets, please refer to <https://www.timeseriesclassification.com/dataset.php>.

## C Baselines

To analyze the performance and effectiveness of Scale-teaching on time-series label-noise learning, we selected seven baselines for comparative analysis. The specific information is as follows.

- Standard directly employs all samples in the training set containing noisy labels and performs supervised classification training using cross-entropy loss. Then, the trained model is used to make predictions on the test set.
- Mixup [10] trains a neural network on convex combinations of pairs of time series samples and their labels (whatever is clean or noisy). For the specific open source code, please refer to <https://github.com/facebookresearch/mixup-cifar10>.
- Co-teaching [11] trains two deep neural networks simultaneously, and lets them teach each other given every mini-batch with selected clean labels based on a small-loss criterion. For the specific open source code, please refer to <https://github.com/bhanML/Co-teaching>.
- FINE [12] utilizes a novel detector for clean label selection. Especially, FINE focus on each data point’s latent representation dynamics and measures the alignment between the latent distribution and each representation using the eigen decomposition of the data gram matrix. For the specific open source code, please refer to [https://github.com/Kthyeon/FINE\\_official](https://github.com/Kthyeon/FINE_official).
- SREA [13] employs a novel multi-task deep learning approach for time series noisy label correction that jointly trains a classifier and an autoencoder with a shared embedding representation. For the specific open source code, please refer to <https://github.com/Castel144/SREA>.
- SELC [14] utilizes a simple and effective method self-ensemble label correction (SELC) to progressively correct noisy labels and refine the model. For the specific open source code, please refer to <https://github.com/MacLLL/SELC>.
- CULCU [15] incorporates the uncertainty of losses by adopting interval estimation instead of point estimation of losses to select clean labels based on Co-teaching. CULCU has two versions: CNLCU-S and CNLCU-H, where CNLCU-S uses soft labels for training and CNLCU-H uses hard labels for training. According to the original paper’s [15] experimental results, CNLCU-S has a better performance. Hence, we use CNLCU-S as a baseline. For the specific open source code, please refer to <https://github.com/xiaoboxia/CNLCU>.

Finally, based on the source code of the above baselines, we provide the reproduction source code of all baselines, as well as the source code of our proposed Scale-teaching (refer to Algorithm 1). For the specific open-source code, please refer to our GitHub repository <https://github.com/qianlima-lab/Scale-teaching>.

Our experiment contains 162 datasets. It would be time-consuming to perform hyperparameter selection for each dataset. Therefore, the hyperparameters of Scale-teaching are not carefully tuned for each dataset, and most of the hyperparameters are set based on the default hyperparameters of related works. The learning rate and maximum epoch are set based on the parameters of existing noise-label learning methods, such as FINE and CULCU.  $\alpha$  in Eq. ??,  $\sigma$  in Eq. ?? and  $\beta$  in Eq. ?? are set based on the default hyperparameters of related label propagation works.  $e_{warm}$  is based on FINE settings.  $e_{update}$ ,  $\gamma$  and batch size are based on manual empirical settings without specific hyperparameter analysis. The largest neighbor  $K$  is set based on human experience, and we had a simple test on several datasets, and found that a larger value of does not improve the classification performance, but instead increases the running time of the model.

For the implementation of small-loss criterion in Scale-teaching, we select small-loss samples within each class from the mini-batch data as clean labeled data. For stduies [11, 16], they use warm-up training to decrease  $\lambda(e)$  from 1 to  $1 - \eta$ .  $\lambda(e)$  denotes the selection ratio of small-loss samples within the mini-batch data without considering the difference of class, and  $\eta$  is the ratio of noise labels in the training set. Based on the above criterion, the current work [17] uses the Jensen-Shannon divergence to calculate difference  $d$  between the classification result  $p_i$  of sample  $\mathcal{X}_i^c$  and the observation label  $\hat{y}_i$ . Following [17], for each class  $c$ , we consider the observed label of  $\mathcal{X}_i^c$  as a clean label when the  $d$  of the training sample  $\mathcal{X}_i^c$  is less than  $d_{avg}^c$  after a  $e_{warm}$  warm-up training.  $d_{avg}^c$  denotes the average

of  $ds$  of all the training samples when the epoch is  $e$ . We observed that using the Jensen-Shannon divergence method [17] and directly employing studies [11, 16] for clean sample selection within each class have distinct strengths and weaknesses when applied to various time series datasets. In our study, we implemented the strategy of studies [11, 16] for clean sample selection within each class on four individual large datasets and the UCR 128 archive. Meanwhile, the Jensen-Shannon divergence method [17] was applied to the UEA 30 archive for clean sample selection within each class.

---

**Algorithm 1** The proposed Scale-teaching paradigm.

---

**Input:** encoders  $[w_A, w_B, w_C]$ , classifiers  $[c_A, c_B, c_C]$ , fine-scale series  $x_A$ , medium-scale series  $x_B$ , and coarse-scale series  $x_C$

**Output:**  $[w_A, w_B, w_C]$  and  $[c_A, c_B, c_C]$

**Note:** For clarity, our analysis utilizes three distinct scales for training, but this approach can be extended to incorporate multiple scales.

1: **Step one:** Obtain single-scale embeddings  $r_A, r_B, r_C$ ;

$$r_A = w_A(x_A);$$

$$r_B = w_B(x_B);$$

$$r_C = w_C(x_C);$$

2: **Step two:** Obtain cross-scale embeddings  $v_A, v_B, v_C$ ;

$$v_A = r_A;$$

$$v_B = \text{Eq.2}(r_B, v_A);$$

$$v_C = \text{Eq.2}(r_C, v_B);$$

3: **Step three:** Obtain clean labels  $y_A, y_B, y_C$  for cross-teaching training;

$$y_A = c_C(v_C) \text{ via small loss criterion};$$

$$y_B = c_A(v_A) \text{ via small loss criterion};$$

$$y_C = c_B(v_B) \text{ via small loss criterion};$$

4: **Step four:** Obtain corrected labels  $yc_A, yc_B, yc_C$  for classification training;

$$yc_A = \text{Eq.6}(v_A, y_A) \text{ via label propagation};$$

$$yc_B = \text{Eq.6}(v_B, y_B) \text{ via label propagation};$$

$$yc_C = \text{Eq.6}(v_C, y_C) \text{ via label propagation};$$

5: **Step five:** Overall training;

$$\text{Update encoder } w_A \text{ and classifier } c_A \text{ via cross-entropy loss}(v_A, y_A \ \& \ yc_A);$$

$$\text{Update encoder } w_B \text{ and classifier } c_B \text{ via cross-entropy loss}(v_B, y_B \ \& \ yc_B);$$

$$\text{Update encoder } w_C \text{ and classifier } c_C \text{ via cross-entropy loss}(v_C, y_C \ \& \ yc_C).$$


---

## D Details of Main Results

For the four individual large time series datasets, the specific classification results of our proposed Scale-teaching paradigm and baselines are shown in Table 2. For the UCR 128 archive, the specific classification results for all methods with different noise ratios are shown in Table 7 (Sym 20%), 8 (Sym 50%), 9 (Asym 40%), and 10 (Ins 40%). For the UEA 30 archive, the specific classification results for all methods at different noise ratios are shown in Tables 11 (Sym 20%), 12 (Sym 50%), 13 (Asym 40%), and 14 (Ins 40%). For layout and reading convenience, we only give the average classification accuracy for multiple runs of all methods without standard deviation on the UCR 128 archive and UEA 30 archive.

## E Details of Multi-scale Results

To analyze the multi-scale mechanism in the Scale-teaching paradigm, we provide the classification performance of classifiers corresponding to fine, medium and coarse scales, as shown in Tables 15 and 17. And the classification results by ablation cross-scale fusion mechanism based on the Scale-teaching are shown in Tables 16 and 18. For the abbreviations in Tables 15, 16, 17 and 18, such as  $a\_t\_b\_f$ ,  $b\_f\_c\_t$ , and  $c\_t\_a\_f$ , where  $a$  denotes fine classifier,  $b$  denotes medium classifier, and  $c$  denotes coarse classifier, and  $t$  and  $f$  represent correct and incorrect classification results, respectively. For example,  $a\_t\_b\_f$  indicates the number of samples correctly predicted by the fine classifier and incorrectly predicted by the medium classifier. In addition, we provide t-SNE [18] visualization on the FD-A dataset with Sym 50% noisy labels (as in Figure 1) to explore the distribution of different

Table 2: The detailed test classification accuracy (%) compared with baselines on four individual large datasets (values in parentheses are standard deviations). The best results are in **bold**.

| Dataset     | Noise    | Standard     | Mixup        | Co-teaching  | FINE          | SREA                | SELC         | CULCU        | Scale-teaching      |
|-------------|----------|--------------|--------------|--------------|---------------|---------------------|--------------|--------------|---------------------|
| HAR         | Sym 20%  | 92.13 (0.64) | 92.52 (1.05) | 92.28 (0.67) | 92.15 (0.55)  | 92.53 (1.41)        | 92.88 (0.82) | 92.66 (0.37) | <b>93.93 (0.66)</b> |
|             | Sym 50%  | 83.99 (2.89) | 76.75 (1.88) | 89.90 (1.63) | 88.42 (3.83)  | <b>91.38 (0.59)</b> | 90.37 (0.73) | 89.91 (2.19) | 90.17 (0.67)        |
|             | Asym 40% | 75.59 (5.39) | 66.91 (2.61) | 87.67 (2.52) | 83.87 (5.98)  | 88.98 (0.57)        | 87.67 (2.39) | 87.22 (1.22) | <b>89.62 (0.73)</b> |
|             | Ins 40%  | 83.56 (2.82) | 73.86 (0.89) | 90.98 (0.96) | 90.77 (0.33)  | 91.25 (1.11)        | 91.02 (1.53) | 91.15 (1.43) | <b>91.58 (1.47)</b> |
| UniMiB-SHAR | Sym 20%  | 87.07 (0.95) | 82.13 (1.08) | 80.54 (2.16) | 26.63 (3.07)  | 51.48 (3.65)        | 68.52 (2.86) | 82.80 (1.87) | <b>90.69 (1.02)</b> |
|             | Sym 50%  | 79.37 (0.41) | 77.77 (1.59) | 66.33 (2.85) | 18.92 (4.61)  | 47.62 (3.33)        | 67.65 (3.31) | 66.36 (3.91) | <b>81.31 (0.67)</b> |
|             | Asym 40% | 63.59 (4.13) | 66.32 (1.93) | 60.25 (1.45) | 19.18 (4.37)  | 51.16 (3.01)        | 55.65 (1.59) | 60.45 (1.65) | <b>70.68 (2.15)</b> |
|             | Ins 40%  | 55.83 (8.14) | 56.97 (6.48) | 54.09 (3.79) | 11.18 (4.75)  | 51.5 (1.98)         | 54.62 (6.63) | 53.90 (4.75) | <b>71.14 (3.99)</b> |
| FD-A        | Sym 20%  | 98.89 (0.05) | 99.78 (0.06) | 99.83 (0.08) | 78.13 (21.47) | 89.92 (0.68)        | 99.67 (0.09) | 99.85 (0.08) | <b>99.93 (0.04)</b> |
|             | Sym 50%  | 96.63 (1.16) | 98.73 (0.62) | 99.04 (0.32) | 70.65 (17.53) | 82.18 (0.01)        | 98.59 (0.25) | 99.06 (0.29) | <b>99.38 (0.53)</b> |
|             | Asym 40% | 96.12 (1.65) | 93.50 (1.85) | 97.06 (4.05) | 61.04 (14.24) | 90.23 (0.02)        | 98.24 (0.58) | 98.91 (0.42) | <b>99.55 (0.36)</b> |
|             | Ins 40%  | 99.36 (0.47) | 99.55 (0.10) | 99.51 (0.19) | 67.81 (12.95) | 88.63 (0.02)        | 99.36 (0.23) | 99.53 (0.22) | <b>99.82 (0.06)</b> |
| Sleep-EDF   | Sym 20%  | 85.01 (0.09) | 84.31 (0.36) | 84.81 (0.14) | 81.21 (0.28)  | 72.79 (0.99)        | 84.32 (0.33) | 85.23 (0.14) | <b>85.56 (0.35)</b> |
|             | Sym 50%  | 83.58 (0.74) | 83.61 (0.39) | 83.39 (0.25) | 78.17 (4.42)  | 72.78 (1.30)        | 83.06 (0.29) | 84.02 (0.53) | <b>84.59 (0.97)</b> |
|             | Asym 40% | 79.62 (2.39) | 77.40 (1.92) | 82.87 (0.40) | 64.77 (2.10)  | 72.23 (0.89)        | 82.50 (1.07) | 83.05 (0.64) | <b>83.87 (0.38)</b> |
|             | Ins 40%  | 84.35 (0.38) | 84.25 (0.31) | 84.62 (0.28) | 79.68 (2.55)  | 71.99 (1.24)        | 83.78 (0.28) | 84.86 (0.22) | <b>85.03 (0.61)</b> |

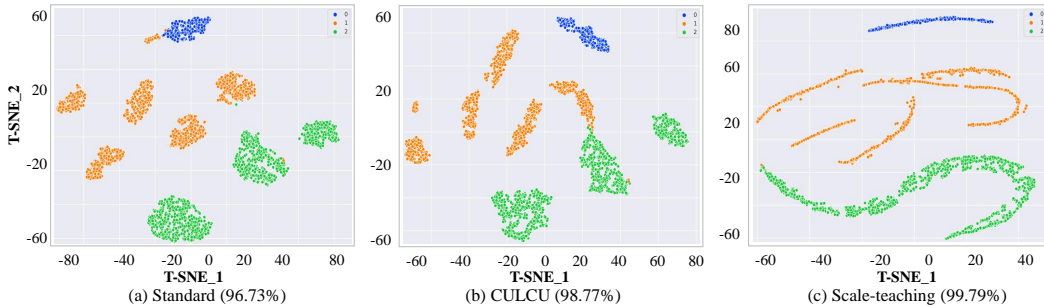

Figure 1: t-SNE visualization of the learned embeddings on the FD-A dataset with Sym 50% noisy labels (values in parentheses are the test classification accuracies).

classes of embeddings. Figure 1 shows that the cross-scale fusion mechanism in Scale-teaching for time-series label-noise learning can make the embeddings of different classes more discriminative, thus facilitating clean sample selection and noisy label correction.

**Impact of downsampling scale sequence list.** Scale-teaching can be performed using a variety of different downsampling scales for label-noise learning. Based on the experience of [19, 20] on time series classification and prediction tasks, we utilize the downsampling scales of [1,2,4] for the experimental analyses of Scale-teaching. However, for real-world scenarios that actually contain noisy labels, it is generally not possible to perform hyperparametric analyses using a clean-labeled validation set. To facilitate the analysis, in this paper, we use the classification performance of the test set for multi-scale hyperparameter analyses. However, to avoid test set information leakage, we do not use the hyperparameter analysis result for Scale-teaching in our experiments. We use two multi-scale sampling strategies for analyses, which are (1) {[1,2], [1,2,3], [1,2,3,4], [1,2,3,4,5]}; (2) {[1,3], [1,2,4], [1,2,4,8], [1,2,4,8,16]}. From Figure 2, we find that Scale-teaching using four different scales for training has the highest classification accuracy, which indicates that more input scales do not necessarily make the classification performance better. In addition, using three or four scales of sequences can effectively improve the classification performance of Scale-teaching compared with using two different scales.

**Impact of input scales of sequences order.** Scale-teaching employs a finer-to-coarser strategy for cross-scale embedding fusion. Intuitively, when a single scale is used for classification, the original single scale (finer) time series is better overall because it does not discard the original sequence information compared to coarser scale time series. Therefore, Scale-teaching is trained using the finer-to-coarser cross-scale fusion strategy. To analyze the difference in classification performance between different fusion directions, we subtract the classification accuracy using the finer-to-coarser and coarser-to-finer training approaches, and the specific results are shown in Figure 3. We can find that the classification performance of finer-to-coarser is better overall, which is due to its ability to

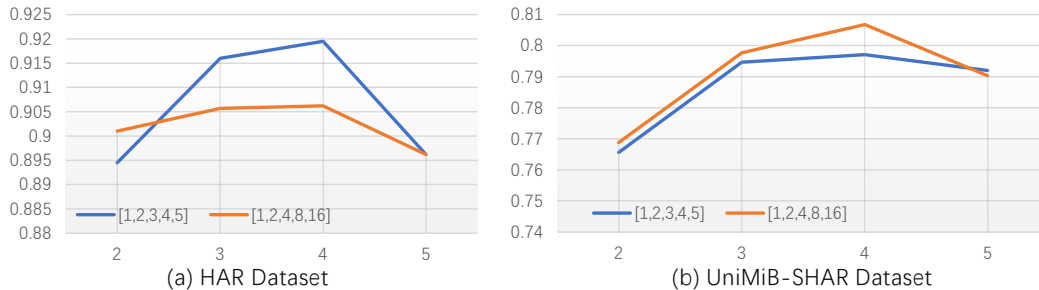

Figure 2: Multi-scale sampling strategies analysis under Sym 50% noisy labels.

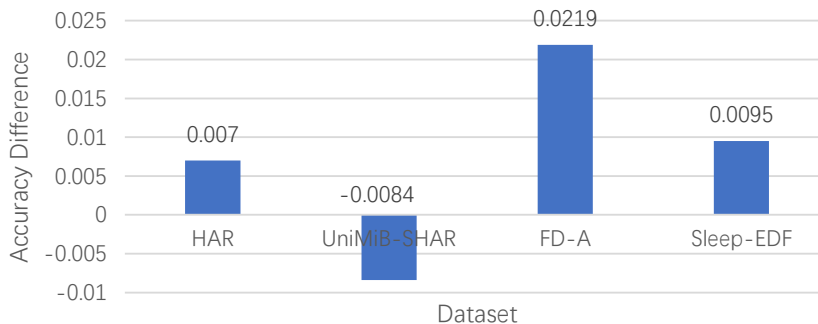

Figure 3: The cross fusion direction of input scale series analysis under Sym 50% noisy labels.

use a single fine-scale sequence with an excellent classification performance from the beginning to gradually promote the classification performance of multiscale fusion embeddings.

## F Small-loss Visualization

The small-loss criterion has been extensively validated for clean label selection in label-noise learning for computer vision. To further analyze the application of the small-loss criterion in time series data, we provide the change of loss values of the models trained by the Standard method and Scale-teaching on Adiac and CricketZ UCR datasets (as in Figure 4). Also, we visualize the probability distributions of the ground-truth clean and noisy (corrupted) sample loss values on the test set with different training strategies. Specifically, Figures 5 and 6 show the loss probability distributions of the models trained by different strategies on the HAR dataset and UniMiB-SHAR with Aysm 40% noisy labels. Both red (clean) and blue (corrupted) in Figure 5 and Figure 6 contain two peaks, which indicate that some correctly labeled samples are still difficult to learn (large loss) and some incorrectly labeled samples are also easy to learn (small loss). Compared with the Standard method (Figure 5 (a) and Figure 6 (a)), Scale-teaching (Figure 5 (b) and Figure 6 (b)) can clearly distinguish clean and noisy samples by the loss value distribution, further validating the robustness of the multi-scale embeddings to cope with time-series noisy labels.

## G Other Analysis

**The test F1-score results of ablation study.** Following [13], we select the averaged F1-score on the test set as a new metric for ablation analysis in Section 4.5. Hence, we give the corresponding test classification F1-score (%) in Tables 3 and 4.

**Running time analysis.** We select two datasets for running the time-consuming analysis, the FD-A dataset with the largest sequence length and the Sleep-EDF dataset with the largest samples. We performed the running time statistics on the NVIDIA GeForce RTX 3090 GPU using all baselines,

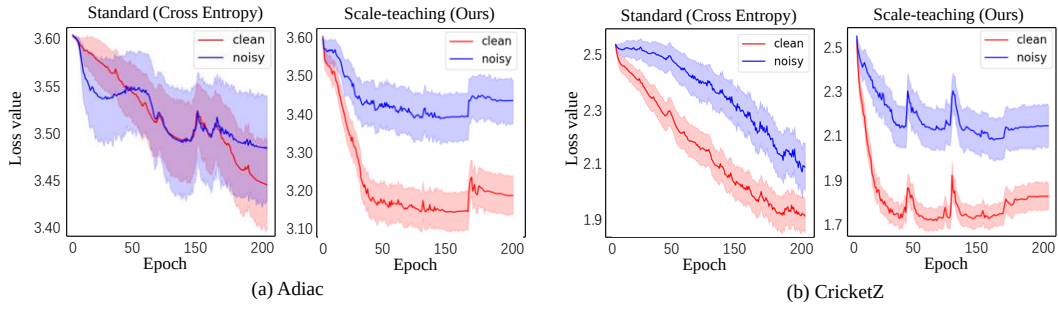

Figure 4: The change of loss values for clean and noisy time series samples under Asym 40% noise labels. The solid line and shading indicate the mean and standard deviation loss values of all clean (or noisy) training samples within each epoch.

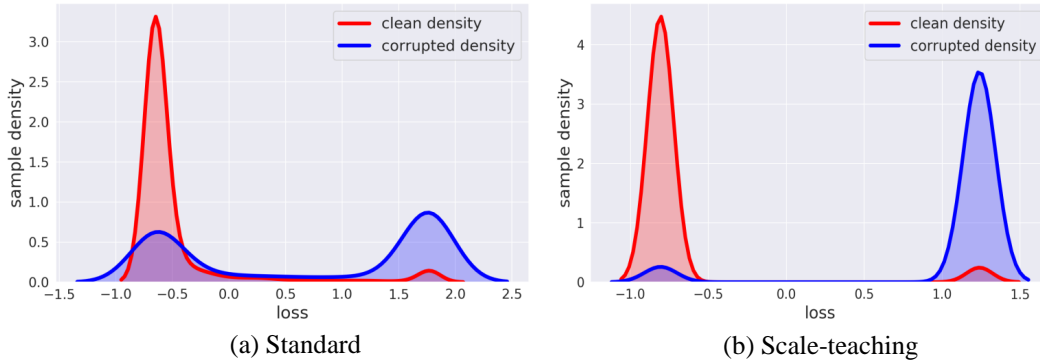

Figure 5: The loss value probability distributions visualization on HAR dataset with Asym 40% noisy labels.

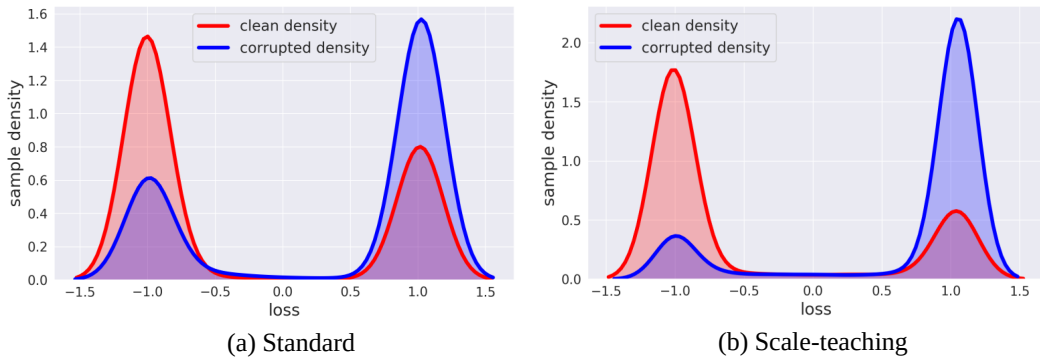

Figure 6: The loss value probability distributions visualization on UniMiB-SHAR dataset with Asym 40% noisy labels.

Table 3: The test classification F1-score (%) results of ablation study (values in parentheses denote drop F1-score).

| Method                 | HAR           |               | UniMiB-SHAR    |                |
|------------------------|---------------|---------------|----------------|----------------|
|                        | Sym 50%       | Asym 40%      | Sym 50%        | Asym 40%       |
| Scale-teaching         | <b>90.05</b>  | <b>89.14</b>  | <b>77.56</b>   | <b>65.89</b>   |
| w/o cross-scale fusion | 88.16 (-1.89) | 87.05 (-2.09) | 68.23 (-9.33)  | 57.76 (-8.13)  |
| only single scale      | 87.56 (-2.49) | 86.75 (-2.39) | 66.87 (-10.69) | 54.12 (-11.77) |
| w/o graph learning     | 87.79 (-2.26) | 87.41 (-1.73) | 74.62 (-2.94)  | 63.15 (-2.74)  |
| w/o moment             | 89.34 (-0.71) | 88.27 (-0.87) | 76.67 (-0.89)  | 64.92 (-0.97)  |
| w/o dynamic threshold  | 88.93 (-1.12) | 88.29 (-0.85) | 73.11 (-4.45)  | 64.76 (-1.17)  |

Table 4: The test classification F1-score (%) results on four individual large datasets without noisy labels. The best results are **bold**, and the second best results are underlined.

| Dataset     | Standard | Mixup        | Co-teaching  | FINE  | SREA  | SELC         | CULCU        | Scale-teaching |
|-------------|----------|--------------|--------------|-------|-------|--------------|--------------|----------------|
| HAR         | 93.27    | <b>95.39</b> | 93.75        | 93.19 | 92.91 | 93.71        | <u>94.72</u> | 94.18          |
| UniMiB-SHAR | 86.37    | 80.17        | 84.43        | 84.03 | 66.54 | <u>89.19</u> | <u>86.45</u> | <b>93.62</b>   |
| FD-A        | 99.93    | 99.91        | <b>99.96</b> | 64.05 | 90.14 | <u>99.82</u> | <u>99.95</u> | <b>99.96</b>   |
| Sleep-EDF   | 81.99    | 82.11        | 82.52        | 83.07 | 77.67 | 82.17        | <u>83.26</u> | <b>84.76</b>   |

and the results are shown in Table 5. On the FD-A dataset with the longest sequence length, Co-teaching and CULCU take essentially twice as long to run as the Standard method because they use two encoders. Furthermore, although SREA uses a single network training, it utilizes a decoder for the unsupervised reconstruction task of the original time series, which significantly increases training time on the FD-A dataset with longer sequences. running time is higher than Co-teaching. The Scale-teaching paradigm uses multiple encoders for training and has an additional noisy label correction module, which is expected to increase the training time. Nevertheless, the larger the sampling scale (coarse scale) of the training data used by the Scale-teaching paradigm, the lower the training elapsed time of its model. For example, with input scales of [1, 8, 32], the training time of Scale-teaching is lower than that of CULCU and SREA. On the SleepEEG dataset with the largest number of samples, we find that FINE with an encoder has a higher running time because FINE using all training samples to select clean labels is time-consuming when the sample size is large. In contrast, the runtime of Scale-teaching is lower than FINE. Also, when the input scales are set to [1,8,32], the runtime of Scale-teaching is lower than SREA.

It is worth noting that when Scale-teaching is trained using two scales, such as [1,2] or [1,16], its training run time decreases further. From the analysis in Appendix E, it is clear that Scale-teaching using three different scales generally performs better than two scales for classification with noisy labels. In addition, the classification performance of [1,2,4], [1,4,16], and [1,8,32] when Scale-teaching is trained using three different scales has less difference in classification performance on datasets with longer sequences (e.g., FD-A and Sleep-EDF). The above results indicate that the Scale-teaching paradigm has a greater advantage in runtime on time-series datasets with longer sequences.

**Robustness analysis.** Three time-series supervised classification methods (Boss [21], Rocket [22] and FCN [23]) and the Scale-teaching paradigm are chosen for robustness analysis against time-series noise labels. Boss [21] is a time series classification method based on similarity search, which can

Table 5: Training time (hours) analysis using the FD-A and Sleep-EDF datasets with Asym 40% noisy labels.

| Dataset   | Standard    | Mixup | Co-teaching | FINE | SREA | SELC | CULCU | Scale-teaching |          |          |
|-----------|-------------|-------|-------------|------|------|------|-------|----------------|----------|----------|
|           |             |       |             |      |      |      |       | [1,2,4]        | [1,4,16] | [1,8,32] |
| FD-A      | <b>0.37</b> | 0.42  | 0.79        | 0.63 | 0.90 | 0.42 | 0.87  | 1.06           | 0.86     | 0.82     |
| Sleep-EDF | <b>0.54</b> | 0.83  | 1.09        | 2.04 | 1.64 | 0.73 | 1.47  | 2.02           | 1.76     | 1.60     |



Table 6: Comparison with classification methods without label noise learning strategy. The best test classification accuracy (%) results are **bold**, and the second best results are underlined.

| Dataset        | HAR          |              |              |              |              | FD-A         |              |              |              |              |
|----------------|--------------|--------------|--------------|--------------|--------------|--------------|--------------|--------------|--------------|--------------|
|                | 0            | Sym 20%      | Sym 50%      | Asym 40%     | Ins 40%      | 0            | Sym 20%      | Sym 50%      | Asym 40%     | Ins 40%      |
| Boss [21]      | 72.34        | 62.55        | 56.11        | 53.29        | 52.34        | 69.75        | 64.75        | 57.95        | 61.99        | 62.25        |
| Rocket [22]    | <b>95.29</b> | 92.93        | 90.04        | 82.53        | 90.43        | <b>99.99</b> | 99.71        | 97.01        | 89.75        | 97.98        |
| FCN [23]       | 93.74        | 92.13        | 83.99        | 75.59        | 83.56        | 99.56        | 98.89        | 96.63        | 96.12        | 99.36        |
| Scale-teaching | 94.72        | <b>93.93</b> | <b>90.17</b> | <b>89.62</b> | <b>91.58</b> | 99.98        | <b>99.93</b> | <b>99.38</b> | <b>99.55</b> | <b>99.82</b> |

effectively mitigate the negative impact of noise (e.g., adding Gaussian noise) in time series values on classification. Rocket [22] uses a large number of randomly initialized convolution kernels to extract time series features, and employs the extracted features to classify time series using a machine learning classifier (e.g., Ridge classifier). FCN [23] is the encoder used by Scale-teaching, which is a time series classification method based on DNNs. As shown in Table 6, the classification performance of the Scale-teaching paradigm using FCN as encoders is better than that of Boss, Rocket and FCN in the presence of noisy labels. It is worth noting that both Boss and Rocket training processes are independent of the optimization of DNNs. However, their classification performance is still reduced due to the influence of noisy labels. In addition, the encoder of the Scale-teaching paradigm can be designed flexibly, such as using ResNet [24], InceptionTime [25] and OS-CNN [26] in the field of time series classification. In other words, using better robustness encoders, the classification performance of Scale-teaching can be further improved with time-series noise labels.

Table 7: The test classification accuracy (%) on UCR archive with Sym 20% noisy labels.

| ID  | Dataset                        | Standard     | MixUp        | Co-teaching   | FINE          | SREA          | SELC         | CULCU         | Scale-teaching |
|-----|--------------------------------|--------------|--------------|---------------|---------------|---------------|--------------|---------------|----------------|
| 1   | ACSF1                          | 71.44        | 73.28        | 67.00         | 10.00         | 54.00         | 70.40        | <b>73.68</b>  | 66.20          |
| 2   | Adiac                          | 14.63        | 12.04        | 11.51         | 2.30          | 3.07          | 19.18        | 33.06         | <b>52.43</b>   |
| 3   | AllGestureWimoteX              | 49.68        | 45.01        | 50.67         | 36.09         | 10.00         | 46.43        | 44.25         | <b>56.66</b>   |
| 4   | AllGestureWimoteY              | 61.37        | 53.29        | 57.01         | 14.03         | 16.91         | 61.14        | 50.07         | <b>64.94</b>   |
| 5   | AllGestureWimoteZ              | 55.09        | 50.13        | 52.34         | 18.20         | 20.09         | 51.00        | 47.42         | <b>64.31</b>   |
| 6   | ArrowHead                      | 65.53        | <b>67.77</b> | 60.72         | 32.11         | 61.14         | 66.74        | 62.31         | 61.71          |
| 7   | BME                            | 48.05        | 51.73        | 47.77         | 47.47         | 50.67         | 49.87        | 48.73         | <b>79.33</b>   |
| 8   | Beef                           | 46.67        | 47.33        | <b>49.33</b>  | 20.00         | 33.33         | 46.67        | 44.47         | 38.00          |
| 9   | BeetleFly                      | 75.00        | 72.20        | 78.00         | 50.00         | 81.00         | 75.00        | 68.00         | <b>85.00</b>   |
| 10  | BirdChicken                    | 86.03        | 86.80        | 89.50         | 50.00         | 75.00         | 86.00        | 83.50         | <b>95.00</b>   |
| 11  | CBF                            | 82.47        | 83.82        | <b>88.81</b>  | 33.38         | 84.18         | 83.53        | 76.75         | 87.24          |
| 12  | Car                            | 65.33        | 66.40        | <b>68.67</b>  | 25.00         | 23.33         | 65.00        | 53.90         | 67.33          |
| 13  | Chinatown                      | 70.13        | 81.55        | 83.28         | 36.52         | 72.46         | 82.43        | <b>83.54</b>  | 73.91          |
| 14  | ChlorineConcentration          | 60.87        | <b>61.19</b> | 59.64         | 47.34         | 55.08         | 58.51        | 57.82         | 61.17          |
| 15  | CinCECGTorso                   | 62.90        | 61.62        | 63.27         | 27.06         | 39.07         | <b>64.51</b> | 54.59         | 55.06          |
| 16  | Coffers                        | 83.43        | 87.43        | 87.43         | 69.29         | 69.29         | 91.43        | 88.57         | <b>100.00</b>  |
| 17  | Computers                      | 72.06        | 73.49        | 71.44         | 57.04         | 70.00         | <b>74.40</b> | 71.24         | 72.00          |
| 18  | CricketX                       | 57.10        | 46.46        | 46.35         | 9.95          | 33.33         | 53.59        | 62.91         | <b>68.67</b>   |
| 19  | CricketY                       | 56.80        | 44.05        | 31.64         | 8.62          | 13.08         | 49.74        | <b>59.88</b>  | 59.23          |
| 20  | CricketZ                       | 51.53        | 37.46        | 37.82         | 8.46          | 26.41         | 45.13        | 53.71         | <b>69.95</b>   |
| 21  | Crop                           | 73.84        | 73.24        | 73.29         | 69.97         | 65.63         | 72.07        | 72.25         | <b>74.44</b>   |
| 22  | DiatomSizeReduction            | 62.05        | 71.27        | 61.54         | 69.72         | 67.32         | 70.13        | 59.29         | <b>82.68</b>   |
| 23  | DistalPhalanxOutlineAgeGroup   | 70.13        | 70.39        | 71.23         | 50.50         | 69.06         | 72.09        | <b>72.83</b>  | 66.62          |
| 24  | DistalPhalanxOutlineCorrect    | 72.10        | 69.20        | 75.91         | 48.33         | 42.75         | 75.22        | 75.22         | <b>79.13</b>   |
| 25  | DistalPhalanxTW                | 66.78        | 66.16        | 64.72         | 29.78         | 58.27         | <b>67.34</b> | 65.74         | 62.59          |
| 26  | DodgerLoopDay                  | 24.40        | 28.50        | 33.55         | 15.50         | 15.00         | 31.25        | 35.10         | <b>36.25</b>   |
| 27  | DodgerLoopGame                 | 57.14        | 62.03        | 65.71         | 50.43         | 52.17         | <b>68.84</b> | 66.16         | 50.00          |
| 28  | DodgerLoopWeekend              | 85.07        | 80.29        | 85.61         | 45.22         | 33.33         | 85.80        | 86.16         | <b>86.96</b>   |
| 29  | ECG200                         | 79.00        | 78.32        | <b>82.60</b>  | 58.40         | 79.20         | 79.80        | 82.10         | 77.00          |
| 30  | ECG5000                        | 92.37        | 91.23        | 92.93         | 44.55         | 90.92         | 92.76        | 93.13         | <b>94.11</b>   |
| 31  | ECGFiveDays                    | 77.11        | <b>77.19</b> | 74.38         | 49.71         | 71.17         | 76.54        | 64.21         | 60.49          |
| 32  | EOGHorizontalSignal            | 49.08        | 42.81        | 47.42         | 41.22         | 10.36         | 40.61        | 41.91         | <b>52.49</b>   |
| 33  | EOGVerticalSignal              | 34.34        | 30.57        | 33.12         | 30.39         | 11.48         | 30.66        | 30.06         | <b>37.18</b>   |
| 34  | Earthquakes                    | 70.65        | 68.78        | 74.53         | 45.04         | <b>74.82</b>  | 72.81        | 74.62         | <b>74.82</b>   |
| 35  | ElectricDevices                | 72.17        | <b>72.97</b> | 72.72         | 63.62         | 64.35         | 72.44        | 72.48         | 70.35          |
| 36  | EthanoLevel                    | 47.78        | 37.52        | 46.61         | 29.00         | 25.20         | 32.20        | 46.66         | <b>57.12</b>   |
| 37  | FaceAll                        | 81.32        | <b>85.48</b> | 82.44         | 10.62         | 71.98         | 85.63        | 82.97         | 75.57          |
| 38  | FaceFour                       | 71.23        | <b>78.68</b> | 65.39         | 24.09         | 54.55         | 75.68        | 65.00         | 51.59          |
| 39  | FacesUCR                       | 77.40        | 60.71        | 65.10         | 10.35         | 34.73         | 69.41        | 75.38         | <b>80.37</b>   |
| 40  | FiftyWords                     | 34.92        | 28.03        | 38.80         | 15.63         | 21.41         | 32.09        | 39.39         | <b>50.95</b>   |
| 41  | Fish                           | 68.94        | 69.71        | 69.77         | 13.60         | 16.00         | 61.71        | 60.65         | <b>72.11</b>   |
| 42  | FordA                          | 89.74        | 90.00        | 90.02         | 64.18         | 86.20         | 90.76        | 90.34         | <b>92.35</b>   |
| 43  | FordB                          | 75.20        | 75.89        | 76.21         | 62.91         | 62.91         | 77.99        | 77.99         | <b>80.00</b>   |
| 44  | FreezerRegularTrain            | 91.76        | <b>95.56</b> | 92.97         | 61.60         | 76.21         | 88.20        | 93.81         | 84.07          |
| 45  | FreezerSmallTrain              | 69.36        | 71.58        | <b>76.13</b>  | 64.18         | 75.79         | 69.52        | 75.23         | 59.81          |
| 46  | Fungi                          | 39.87        | 22.11        | 24.62         | 24.52         | 23.66         | 31.18        | <b>44.09</b>  | 26.34          |
| 47  | GestureMidAirD1                | 31.31        | 28.62        | 25.31         | 24.00         | 19.23         | 33.85        | 32.20         | <b>43.23</b>   |
| 48  | GestureMidAirD2                | 29.23        | 23.42        | 21.92         | 3.85          | 13.08         | 26.92        | 27.51         | <b>34.62</b>   |
| 49  | GestureMidAirD3                | 16.31        | 14.49        | 14.52         | 14.00         | 8.46          | 15.38        | 20.08         | <b>23.85</b>   |
| 50  | GesturePebbleZ1                | 54.88        | 52.07        | 44.12         | 29.30         | 57.21         | 59.88        | <b>78.35</b>  | 72.56          |
| 51  | GesturePebbleZ2                | 73.39        | 73.11        | 74.44         | 32.78         | 57.72         | 75.95        | 75.09         | <b>81.27</b>   |
| 52  | GunPoint                       | 71.79        | 76.53        | 69.47         | 49.87         | 57.33         | <b>81.61</b> | 70.24         | 76.00          |
| 53  | GunPointAgeSpan                | 74.33        | 85.72        | 75.57         | 53.54         | 50.63         | <b>83.67</b> | 89.11         | 58.23          |
| 54  | GunPointMaleVersusFemale       | 85.65        | 92.68        | 93.82         | 68.48         | 47.47         | 94.24        | 94.65         | 96.20          |
| 55  | GunPointOldVersusYoung         | 95.96        | 99.62        | 98.90         | <b>100.00</b> | 47.62         | 99.56        | <b>100.00</b> | <b>100.00</b>  |
| 56  | Ham                            | 63.62        | 65.18        | 67.24         | 49.71         | 57.90         | <b>68.76</b> | 65.62         | 63.81          |
| 57  | HandOutlines                   | 76.53        | 70.30        | 75.97         | 58.66         | 64.05         | 68.92        | 70.29         | <b>82.05</b>   |
| 58  | Haptics                        | 38.61        | <b>39.27</b> | 38.06         | 19.87         | 26.62         | 37.27        | 36.81         | 38.70          |
| 59  | Herring                        | 54.94        | 62.69        | 59.69         | 55.63         | 59.38         | 62.81        | 59.38         | <b>66.56</b>   |
| 60  | HouseTwenty                    | 79.52        | 83.13        | 83.12         | 48.40         | 57.98         | 84.03        | <b>84.81</b>  | 67.39          |
| 61  | InlineSkate                    | 27.12        | 23.24        | 25.24         | 13.85         | 18.36         | 25.64        | 28.19         | <b>29.49</b>   |
| 62  | InsectEPRRegularTrain          | 99.37        | 95.98        | <b>100.00</b> | 96.63         | <b>100.00</b> | 96.63        | <b>100.00</b> | <b>100.00</b>  |
| 63  | InsectEPGSmallTrain            | 72.17        | 73.25        | 93.88         | 93.25         | 95.46         | 77.03        | 95.46         | <b>100.00</b>  |
| 64  | InsectWingbeatSound            | 31.69        | 28.82        | 30.47         | 9.09          | 11.10         | 32.07        | 29.18         | <b>42.66</b>   |
| 65  | ItalyPowerDemand               | 75.12        | 78.53        | 84.47         | 49.91         | 83.45         | 90.38        | <b>90.79</b>  | 89.08          |
| 66  | LargeKitchenAppliances         | 85.79        | 85.91        | 87.07         | 43.71         | 67.24         | <b>87.20</b> | 83.18         | 86.67          |
| 67  | Lightning2                     | 56.28        | 63.21        | 62.62         | 52.46         | 59.61         | <b>64.26</b> | 63.77         | 62.30          |
| 68  | Lightning7                     | 50.73        | 55.01        | 56.16         | 21.10         | 50.96         | <b>56.44</b> | 51.97         | 53.97          |
| 69  | Mallat                         | 49.13        | 43.14        | 47.91         | 12.48         | 13.76         | 59.28        | 50.63         | <b>73.17</b>   |
| 70  | Meat                           | 43.40        | 72.00        | 66.67         | 35.33         | 33.33         | 71.67        | 61.73         | <b>82.33</b>   |
| 71  | MedicalImages                  | 66.11        | 61.14        | 67.42         | 34.47         | 51.45         | 65.66        | 61.89         | <b>70.45</b>   |
| 72  | MelbournePedestrian            | 90.99        | 91.95        | 91.82         | 56.87         | 29.00         | 90.29        | 90.16         | <b>95.18</b>   |
| 73  | MiddlePhalanxOutlineAgeGroup   | 50.49        | 49.77        | 57.95         | 49.48         | <b>61.69</b>  | 58.31        | 56.52         | 49.61          |
| 74  | MiddlePhalanxOutlineCorrect    | 73.79        | 75.01        | 77.56         | 48.59         | 57.04         | <b>77.87</b> | 74.31         | 67.01          |
| 75  | MiddlePhalanxTW                | 53.17        | 52.44        | 54.48         | 28.05         | 55.84         | <b>55.97</b> | 54.22         | 50.91          |
| 76  | MixedShapesRegularTrain        | 69.09        | 93.43        | 93.10         | 21.87         | 54.62         | 92.54        | 92.11         | <b>94.25</b>   |
| 77  | MixedShapesSmallTrain          | <b>80.06</b> | 72.49        | 69.00         | 20.59         | 35.86         | 75.47        | 77.16         | 70.95          |
| 78  | MotesTrain                     | 75.20        | 78.42        | 80.15         | 50.78         | 79.85         | 80.38        | <b>82.33</b>  | 53.91          |
| 79  | NonInvasiveFetalECGThorax1     | 36.94        | 24.37        | 11.79         | 2.44          | 4.99          | 38.12        | 40.73         | <b>87.54</b>   |
| 80  | NonInvasiveFetalECGThorax2     | 39.71        | 24.79        | 13.56         | 2.24          | 10.52         | 31.65        | 42.42         | <b>81.01</b>   |
| 81  | OSULeaf                        | <b>88.94</b> | 85.52        | 87.66         | 49.51         | 15.21         | 41.49        | 87.60         | 87.73          |
| 82  | OliveOil                       | 44.67        | 42.00        | 42.00         | 40.00         | 40.00         | 40.00        | 43.67         | <b>66.67</b>   |
| 83  | PLAID                          | 36.09        | 38.13        | 38.73         | 25.88         | 25.88         | 37.09        | <b>39.61</b>  | 22.72          |
| 84  | PhalangesOutlinesCorrect       | 77.26        | 77.60        | 76.36         | 47.74         | 65.29         | 77.62        | <b>77.69</b>  | 71.93          |
| 85  | Phoneme                        | 27.10        | 24.62        | 27.13         | 19.76         | 11.18         | 25.63        | <b>27.60</b>  | 25.45          |
| 86  | PickupGestureWimoteZ           | 52.24        | 42.00        | 38.00         | 10.00         | 20.00         | 44.00        | 56.48         | <b>66.00</b>   |
| 87  | PigAirwayPressure              | 12.56        | 9.37         | 12.02         | 11.23         | 3.85          | 12.02        | 14.52         | <b>14.52</b>   |
| 88  | PigArtPressure                 | 18.98        | 11.63        | 11.54         | 23.54         | 3.85          | 15.38        | 28.96         | <b>29.23</b>   |
| 89  | PigCVP                         | 10.83        | 9.85         | 9.62          | <b>18.79</b>  | 8.65          | 12.98        | 13.01         | 15.38          |
| 90  | Plane                          | 95.55        | 91.62        | 93.48         | 12.19         | 82.29         | 91.43        | 94.38         | <b>100.00</b>  |
| 91  | PowerCons                      | 78.02        | 76.49        | 84.94         | 50.00         | <b>85.22</b>  | 82.22        | 82.86         | 83.22          |
| 92  | ProximalPhalanxOutlineAgeGroup | 82.22        | 81.74        | 84.24         | 37.17         | <b>85.37</b>  | 84.88        | 83.74         | 78.63          |
| 93  | ProximalPhalanxOutlineCorrect  | 84.37        | 83.92        | 85.45         | 53.68         | 67.29         | 84.88        | <b>85.79</b>  | 80.48          |
| 94  | ProximalPhalanxTW              | 77.78        | 79.57        | 78.34         | 25.27         | 67.80         | <b>79.80</b> | 78.38         | 79.51          |
| 95  | RefrigerationDevices           | 51.19        | 50.23        | 53.86         | 33.33         | <b>54.36</b>  | 54.13        | 47.35         | 52.48          |
| 96  | Rock                           | 41.64        | 40.08        | 41.84         | 25.60         | 28.00         | 41.60        | <b>43.28</b>  | 34.00          |
| 97  | ScreenType                     | 63.14        | 61.79        | <b>63.66</b>  | 33.33         | 42.13         | 62.56        | 61.19         | 57.44          |
| 98  | SemgHandGestureCh2             | 73.73        | 74.07        | 71.61         | 67.82         | 65.00         | 73.07        | 72.84         | <b>74.10</b>   |
| 99  | SemgHandMovementCh2            | 47.93        | 47.00        | 52.93         | 38.18         | 23.47         | 48.00        | 50.03         | <b>57.47</b>   |
| 100 | SemgHandSubjectCh2             | 61.80        | 58.77        | 60.73         | 32.18         | 28.00         | 60.44        | 58.02         | <b>71.02</b>   |
| 101 | ShakeGestureWimoteZ            | 63.32        | 60.24        | 51.60         | 20.40         | 44.00         | 68.00        | <b>73.72</b>  | 63.20          |
| 102 | ShapeletSim                    | 61.11        | 71.76        | 79.67         | 50.00         | <b>85.20</b>  | 67.33        | 60.01         | 80.00          |
| 103 | ShapesAll                      | 45.85        | 32.73        | 45.33         | 1.67          | 1.67          | 36.67        | 37.96         | <b>74.77</b>   |
| 104 | SmallKitchenAppliances         | 73.53        | 78.66        | 78.86         | 54.77         | 75.81         | <b>80.75</b> | 77.91         | 80.00          |
| 105 | SmoothSubspace                 | 76.00        | 85.20        | 92.13         | 33.33         | 88.53         | 90.00        | <b>92.67</b>  | 90.00          |
| 106 | SonyAIBORobotSurface1          | 77.13        | 83.54        | <b>87.07</b>  | 45.76         | 84.65         | 83.66        | 83.48         | 78.74          |
| 107 | SonyAIBORobotSurface2          | 76.63        | 82.92        | 87.18         | 47.66         | 81.94         | 83.88        | 87.56         | <b>92.24</b>   |
| 108 | StarLightCurves                | 96.87        | 97.08        | 97.14         | 57.32         | 85.39         | <b>97.19</b> | 96.95         | 95.82          |
| 109 | Strawberry                     | 91.37        | 92.52        | 91.19         | 52.86         | 70.65         | 93.03        | 93.67         | <b>93.41</b>   |
| 110 | SweatshLeaf                    | 89.89        | 83.71        | 90.64         | 6.27          | 33.88         | 88.83        | 85.42         | <b>95.36</b>   |
| 111 | Symbols                        | <b>76.37</b> | 63.00        | 67.16         | 22.44         | 70.37         | 60.16        | 69.00         | 60.80          |
| 112 | SyntheticControl               | 91.47        | 93.19        | 97.80         | 20.00         | <b>98.48</b>  | 96.20        | 97.90         | 96.33          |
| 113 | ToeSegmentation1               | 84.12        | 79.30        | 84.51         | 50.53         | 83.26         | 84.91        | <b>85.48</b>  | 73.68          |
| 114 | ToeSegmentation2               | 77.23        | 74.43        | 83.23         | 43.69         | <b>84.74</b>  | 77.69        | 82.92         | 83.85          |
| 115 | Trace                          | 95.16        | 92.24        | 91.20         | 26.00         | 84.20         | 90.00        | <b>98.60</b>  | 92.00          |
| 116 | TwoLeadECG                     | 86.50        | 83.13        | 83.63         | 49.96         | 84.27         | <b>87.39</b> | 84.11         | 69.39          |
| 117 | TwoPatterns                    |              |              |               |               |               |              |               |                |

Table 8: The test classification accuracy (%) on UCR archive with Sym 50% noisy labels.

| ID  | Dataset                        | Standard     | MixUp        | Co-teaching  | FINE         | SREA         | SELC         | CULCU        | Scale-teaching |
|-----|--------------------------------|--------------|--------------|--------------|--------------|--------------|--------------|--------------|----------------|
| 1   | ACSF1                          | 41.00        | 45.00        | 36.96        | 10.00        | 29.60        | 47.00        | <b>47.20</b> | 42.00          |
| 2   | Adiac                          | 12.48        | 8.56         | 6.39         | 2.20         | 4.09         | 9.97         | 23.55        | <b>31.65</b>   |
| 3   | AllGestureWimoteX              | 33.14        | 22.89        | 29.32        | 31.29        | 18.09        | 32.17        | 26.40        | <b>37.91</b>   |
| 4   | AllGestureWimoteY              | 36.51        | 31.00        | 32.46        | 19.05        | 16.97        | 35.00        | 31.64        | <b>39.57</b>   |
| 5   | AllGestureWimoteZ              | 38.14        | 28.69        | 32.02        | 11.29        | 15.57        | 37.49        | 33.63        | <b>42.95</b>   |
| 6   | ArrowHead                      | 34.29        | 31.31        | 31.43        | 33.94        | 30.29        | 38.40        | 37.83        | <b>39.25</b>   |
| 7   | BME                            | 33.23        | 13.73        | 34.00        | 35.73        | 35.87        | 33.33        | 33.33        | <b>36.80</b>   |
| 8   | Beef                           | 23.33        | 21.33        | 29.67        | 20.00        | 20.00        | 30.33        | <b>31.00</b> | 30.00          |
| 9   | BeetleFly                      | 51.00        | 40.00        | 49.00        | 50.00        | 46.00        | <b>53.00</b> | 52.00        | 50.00          |
| 10  | BirdChicken                    | 59.08        | 45.00        | 60.50        | 50.00        | 55.00        | 61.00        | 52.50        | <b>71.00</b>   |
| 11  | CBF                            | 61.35        | 44.33        | 58.24        | 33.29        | 63.22        | 60.93        | 53.36        | <b>64.30</b>   |
| 12  | Car                            | 49.33        | 38.33        | 42.50        | 23.33        | 23.33        | <b>50.00</b> | 38.17        | 30.67          |
| 13  | Chinatown                      | 60.79        | 58.71        | 62.15        | <b>65.51</b> | 36.52        | 59.54        | 55.30        | 57.22          |
| 14  | ChlorineConcentration          | 43.88        | 41.59        | 46.69        | 29.47        | <b>50.27</b> | 41.63        | 44.85        | 49.17          |
| 15  | CinCECGTorso                   | 42.43        | 44.10        | 34.84        | 24.91        | 31.44        | <b>45.55</b> | 31.86        | 40.47          |
| 16  | CoilTex                        | 60.00        | 54.29        | 55.39        | 47.86        | 46.43        | 55.71        | 52.50        | <b>65.71</b>   |
| 17  | Computers                      | 49.74        | 51.47        | <b>54.24</b> | 47.76        | 50.48        | 51.76        | 47.60        | 54.16          |
| 18  | CricketX                       | 31.32        | 25.20        | 24.77        | 8.36         | 13.08        | 28.05        | <b>43.39</b> | 39.73          |
| 19  | CricketY                       | 33.67        | 29.13        | 23.85        | 8.46         | 8.46         | 31.69        | 36.77        | <b>41.73</b>   |
| 20  | CricketZ                       | 29.19        | 24.71        | 26.90        | 7.49         | 20.77        | 26.92        | <b>35.78</b> | 33.10          |
| 21  | Crop                           | 67.58        | 68.22        | 68.04        | 44.52        | 64.11        | 67.81        | 68.23        | <b>70.12</b>   |
| 22  | DiatomSizeReduction            | 54.34        | <b>63.23</b> | 47.78        | 33.53        | 50.65        | 61.50        | 47.68        | 57.49          |
| 23  | DistalPhalanxOutlineAgeGroup   | 50.85        | 53.96        | 64.26        | 38.71        | 62.30        | 62.16        | <b>66.62</b> | 63.57          |
| 24  | DistalPhalanxOutlineCorrect    | 51.52        | <b>52.32</b> | 51.59        | 48.33        | 48.33        | 48.04        | 50.93        | 50.87          |
| 25  | DistalPhalanxTW                | 55.65        | 55.57        | 56.97        | 29.78        | 51.65        | 59.14        | 58.27        | <b>59.17</b>   |
| 26  | DodgerLoopDay                  | 19.15        | 21.40        | 26.37        | 14.50        | 15.00        | 23.00        | 21.90        | <b>28.25</b>   |
| 27  | DodgerLoopWeekend              | 49.71        | 48.70        | 50.88        | 49.57        | 50.72        | 50.29        | <b>53.33</b> | 50.06          |
| 28  | DodgerLoopWeekend              | 62.46        | 64.46        | 71.59        | 64.35        | 37.83        | 62.17        | 54.71        | <b>77.45</b>   |
| 29  | ECG200                         | 49.80        | 49.48        | 52.20        | 52.80        | 40.80        | 50.20        | 53.60        | <b>58.40</b>   |
| 30  | ECG5000                        | 69.14        | 76.27        | 90.83        | 39.94        | 90.15        | 88.90        | 90.50        | <b>91.58</b>   |
| 31  | ECGFiveDays                    | 50.46        | 51.34        | <b>53.93</b> | 49.71        | 51.86        | 50.31        | 50.71        | 44.87          |
| 32  | EOGHorizontalSignal            | 38.43        | 34.56        | 37.76        | 35.30        | 13.65        | 31.82        | 30.34        | <b>41.30</b>   |
| 33  | EOGVerticalSignal              | 26.25        | 22.59        | 23.72        | 20.32        | 11.49        | 23.31        | 19.25        | <b>29.73</b>   |
| 34  | Earthquakes                    | 53.32        | 54.10        | 66.98        | <b>74.82</b> | 64.75        | 51.94        | 61.37        | 60.78          |
| 35  | ElectricDevices                | 67.65        | 66.58        | 68.36        | 64.03        | 57.10        | 67.89        | <b>68.50</b> | 64.91          |
| 36  | EthanolLevel                   | 32.62        | 28.57        | 31.75        | 25.38        | 25.20        | 27.76        | 32.60        | <b>35.02</b>   |
| 37  | FaceAll                        | 56.62        | 46.70        | 50.99        | 10.52        | 10.12        | <b>56.96</b> | 52.02        | 53.53          |
| 38  | FaceFour                       | 40.68        | 50.45        | 42.16        | 23.18        | 32.00        | <b>50.68</b> | 38.98        | 35.05          |
| 39  | FacesUCR                       | <b>44.98</b> | 42.32        | 42.96        | 11.29        | 18.86        | 44.81        | 43.64        | 41.57          |
| 40  | FiftyWords                     | 31.64        | 29.46        | 33.14        | 28.54        | 12.97        | 30.99        | 30.30        | <b>37.51</b>   |
| 41  | Fish                           | 48.69        | <b>51.20</b> | 35.93        | 13.71        | 16.00        | 47.77        | 35.41        | 32.55          |
| 42  | FordA                          | 49.46        | 49.33        | <b>56.38</b> | 52.47        | 51.59        | 54.58        | 49.19        | 54.83          |
| 43  | FordB                          | 50.39        | 49.81        | 47.09        | 46.53        | 50.10        | <b>50.52</b> | 45.95        | 48.54          |
| 44  | FreezerRegularTrain            | 38.15        | 53.98        | 48.56        | 54.20        | <b>55.21</b> | 54.46        | 45.08        | 47.16          |
| 45  | FreezerSmallTrain              | 32.25        | 47.09        | 50.30        | 51.39        | 50.47        | 43.63        | 50.17        | <b>51.81</b>   |
| 46  | Fungi                          | 15.59        | 17.20        | 16.32        | 18.34        | 10.75        | 15.59        | 17.92        | <b>19.18</b>   |
| 47  | GestureMidAirD1                | 19.48        | 17.32        | 13.32        | 6.92         | 15.38        | 18.46        | 22.69        | <b>24.18</b>   |
| 48  | GestureMidAirD2                | 17.08        | 12.31        | 9.29         | 5.08         | 10.46        | 13.08        | 17.57        | <b>25.29</b>   |
| 49  | GestureMidAirD3                | 10.92        | 10.80        | 7.65         | 9.02         | 6.92         | 9.38         | <b>13.42</b> | 12.12          |
| 50  | GesturePebbleZ1                | 41.67        | 37.16        | 49.58        | 23.02        | 35.37        | 41.30        | <b>57.20</b> | 47.81          |
| 51  | GesturePebbleZ2                | 48.25        | 49.97        | 50.61        | 19.87        | 41.57        | 51.04        | 44.49        | <b>55.39</b>   |
| 52  | GunPoint                       | 37.68        | 35.44        | 46.00        | 49.87        | 47.87        | 36.27        | 47.60        | <b>52.80</b>   |
| 53  | GunPointAgeSpan                | 50.09        | 50.30        | 48.34        | 49.05        | 50.13        | 50.00        | 46.30        | <b>55.44</b>   |
| 54  | GunPointMaleVersusFemale       | 46.68        | 44.87        | 55.09        | 49.30        | 49.49        | 48.61        | 51.14        | <b>56.75</b>   |
| 55  | GunPointOldVersusYoung         | 53.69        | 56.10        | 61.82        | 50.79        | 50.48        | 61.46        | 54.79        | <b>70.54</b>   |
| 56  | Ham                            | 46.29        | 47.20        | <b>54.19</b> | 50.29        | 49.33        | 49.14        | 53.05        | 50.10          |
| 57  | HandOutlines                   | 38.01        | 35.18        | <b>47.62</b> | 46.97        | 47.19        | 35.51        | 35.25        | 47.14          |
| 58  | Haptics                        | 24.61        | <b>29.77</b> | 25.95        | 20.39        | 21.75        | 28.83        | 24.35        | 28.16          |
| 59  | Herring                        | 51.06        | 56.00        | 59.38        | 51.88        | 55.63        | 52.81        | 59.38        | <b>59.69</b>   |
| 60  | HouseTwenty                    | 35.29        | 55.16        | 48.07        | 51.60        | 48.40        | 55.46        | <b>55.50</b> | 53.78          |
| 61  | InlineSkate                    | 20.43        | 19.03        | 19.79        | 15.64        | 18.36        | 19.24        | <b>21.40</b> | 18.78          |
| 62  | InsectEPRRegularTrain          | 71.20        | 72.48        | 82.21        | 85.14        | <b>93.25</b> | 78.23        | 69.52        | 76.87          |
| 63  | InsectEPGSmallTrain            | 58.68        | 55.71        | <b>75.78</b> | 51.97        | <b>75.78</b> | 75.50        | 64.90        | <b>75.78</b>   |
| 64  | InsectWingbeatSound            | 20.01        | 19.37        | 18.73        | 9.09         | 9.09         | 20.53        | 18.96        | <b>23.04</b>   |
| 65  | ItalyPowerDemand               | 48.54        | 47.80        | 50.46        | 50.03        | 51.74        | 48.92        | 49.49        | 49.18          |
| 66  | LargeKitchenAppliances         | 57.01        | 62.35        | 64.25        | 36.75        | 40.27        | <b>70.88</b> | 57.23        | 60.23          |
| 67  | Lightning2                     | 55.08        | 52.00        | 52.62        | 50.82        | 47.61        | 52.46        | 51.15        | <b>58.03</b>   |
| 68  | Lightning7                     | 38.41        | 38.41        | 40.19        | 13.70        | 32.33        | 41.37        | <b>43.67</b> | 41.81          |
| 69  | Mallat                         | 29.34        | <b>39.77</b> | 29.91        | 12.43        | 12.54        | 38.02        | 26.15        | 35.48          |
| 70  | Meat                           | 65.80        | <b>66.07</b> | 45.33        | 26.00        | 33.33        | 56.00        | 42.87        | 45.67          |
| 71  | MedicalImages                  | 53.02        | 52.82        | 57.34        | 42.74        | 51.45        | 56.39        | 54.61        | <b>58.01</b>   |
| 72  | MelbournePedestrian            | 84.49        | 84.78        | <b>87.37</b> | 48.33        | 29.05        | 86.96        | 86.85        | 87.17          |
| 73  | MiddlePhalanxOutlineAgeGroup   | 43.79        | 40.70        | 35.79        | 34.16        | 37.92        | 42.60        | <b>54.29</b> | 46.42          |
| 74  | MiddlePhalanxOutlineCorrect    | 46.21        | 47.64        | 46.63        | 42.96        | 45.77        | 47.63        | 45.99        | <b>48.59</b>   |
| 75  | MiddlePhalanxTW                | 48.73        | 48.60        | 51.36        | 23.38        | <b>55.84</b> | 52.34        | 54.25        | 53.38          |
| 76  | MixedShapesRegularTrain        | 80.82        | 84.57        | 84.04        | 20.86        | 46.24        | <b>86.16</b> | 78.97        | 69.96          |
| 77  | MixedShapesSmallTrain          | 58.86        | 57.25        | 41.97        | 21.19        | 23.96        | 57.84        | <b>59.24</b> | 46.12          |
| 78  | MotesTrain                     | 43.45        | 41.48        | <b>50.14</b> | 47.65        | 44.47        | 43.59        | 43.57        | 47.77          |
| 79  | NonInvasiveFetalECGThorax1     | 20.65        | 13.78        | 8.20         | 2.50         | 2.95         | 15.37        | 27.85        | <b>60.47</b>   |
| 80  | NonInvasiveFetalECGThorax2     | 21.97        | 14.82        | 8.65         | 2.40         | 2.90         | 15.93        | 32.00        | <b>61.47</b>   |
| 81  | OSULeaf                        | 66.60        | 57.31        | 47.21        | 19.09        | 40.17        | 56.12        | <b>68.47</b> | 48.46          |
| 82  | OliveOil                       | 36.53        | 35.60        | 34.67        | 38.00        | 34.67        | 35.33        | 32.67        | <b>40.40</b>   |
| 83  | PLAID                          | 33.62        | 33.77        | 30.50        | 24.45        | 20.48        | 32.40        | <b>34.63</b> | 32.62          |
| 84  | PhalangesOutlinesCorrect       | 52.63        | 53.25        | 52.19        | 50.73        | 51.86        | <b>56.22</b> | 47.93        | 49.03          |
| 85  | Phoneme                        | 20.13        | 18.93        | 19.15        | 17.54        | 9.44         | 20.22        | <b>21.72</b> | 19.73          |
| 86  | PickupGestureWimoteZ           | 26.72        | 25.28        | 30.80        | 10.00        | 16.80        | 29.60        | 31.76        | <b>33.12</b>   |
| 87  | PigAirwayPressure              | 9.52         | 7.00         | 7.69         | 5.42         | 3.85         | 7.69         | 9.90         | 9.90           |
| 88  | PigAirwayPressure              | 9.90         | 8.27         | 9.38         | 4.52         | 2.88         | 8.17         | 17.21        | <b>18.42</b>   |
| 89  | PigCVP                         | 7.21         | 6.00         | 7.93         | 2.67         | 5.58         | 5.96         | 8.94         | <b>10.33</b>   |
| 90  | Plane                          | 78.13        | 81.75        | 67.57        | 14.10        | 73.14        | <b>82.86</b> | 81.52        | 68.76          |
| 91  | PowerCons                      | 50.56        | <b>51.73</b> | 50.06        | 48.11        | 50.31        | 50.56        | 49.17        | 37.33          |
| 92  | ProximalPhalanxOutlineAgeGroup | 65.13        | 67.98        | 69.06        | 29.07        | 71.71        | 73.56        | <b>83.86</b> | 72.70          |
| 93  | ProximalPhalanxOutlineCorrect  | 49.73        | 49.73        | 59.49        | <b>61.03</b> | 46.32        | 48.73        | 45.60        | <b>61.03</b>   |
| 94  | ProximalPhalanxTW              | 73.01        | 73.89        | 69.22        | 22.34        | 67.80        | 75.51        | <b>77.76</b> | 72.49          |
| 95  | RefrigerationDevices           | 42.30        | 41.14        | 44.64        | 37.33        | 45.55        | 43.36        | <b>45.62</b> | 43.77          |
| 96  | Rock                           | 29.60        | 27.20        | 25.40        | 19.20        | 28.40        | 26.80        | <b>31.00</b> | 26.40          |
| 97  | ScreenType                     | 47.13        | <b>47.84</b> | 43.20        | 36.11        | 39.73        | 46.45        | 43.76        | 41.29          |
| 98  | SemgHandGestureCh2             | 47.51        | 49.70        | 46.14        | <b>51.72</b> | 41.00        | 49.93        | 48.03        | 46.95          |
| 99  | SemgHandMovementCh2            | 42.62        | 38.52        | <b>42.91</b> | 35.11        | 27.16        | 40.40        | 38.93        | 39.84          |
| 100 | SemgHandSubjectCh2             | 44.76        | <b>49.64</b> | 43.21        | 24.37        | 26.00        | 48.36        | 44.08        | 46.44          |
| 101 | ShakeGestureWimoteZ            | 39.12        | 32.16        | 29.84        | 15.60        | 16.40        | 34.00        | <b>47.80</b> | 28.48          |
| 102 | ShapeletSim                    | 51.78        | 52.18        | 49.94        | 50.00        | 57.02        | 52.00        | 48.09        | <b>59.98</b>   |
| 103 | ShapesAll                      | 26.78        | 19.34        | 28.77        | 6.43         | 1.67         | 20.83        | 22.48        | <b>43.24</b>   |
| 104 | SmallKitchenAppliances         | 55.62        | 57.22        | 63.45        | 53.89        | 50.14        | <b>63.47</b> | 57.20        | 57.65          |
| 105 | SmoothSubspace                 | 51.60        | 51.01        | 68.33        | 33.33        | 50.64        | 51.47        | <b>71.88</b> | 56.40          |
| 106 | SonyAIBORobotSurface1          | 56.49        | 54.22        | <b>71.80</b> | 51.41        | 52.45        | 56.84        | 54.74        | 48.42          |
| 107 | SonyAIBORobotSurface2          | 48.29        | 48.87        | 46.92        | 47.66        | 47.94        | 47.97        | 48.67        | <b>61.36</b>   |
| 108 | StarLightCurves                | 86.01        | 89.49        | 87.59        | 63.60        | 85.41        | <b>91.02</b> | 89.15        | 86.81          |
| 109 | Strawberry                     | 48.92        | 47.99        | 45.65        | <b>49.86</b> | 41.41        | 47.66        | 43.03        | 45.33          |
| 110 | SweatshirtsLeaf                | 66.72        | 66.50        | 68.52        | 6.21         | 19.40        | <b>69.28</b> | 61.14        | 67.74          |
| 111 | Symbols                        | 44.22        | 50.24        | 43.06        | 28.52        | <b>50.98</b> | 47.20        | 44.68        | <b>50.98</b>   |
| 112 | SyntheticControl               | 62.23        | 64.69        | <b>92.60</b> | 16.67        | 80.07        | 72.93        | 89.60        | 88.32          |
| 113 | ToeSegmentation1               | 41.23        | 42.93        | 46.04        | <b>50.53</b> | 47.58        | 43.07        | 41.32        | 49.47          |
| 114 | ToeSegmentation2               | 51.54        | 56.89        | 60.06        | 53.69        | 55.91        | 54.92        | <b>60.92</b> | 41.78          |
| 115 | Trace                          | 73.64        | <b>77.32</b> | 73.42        | 53.80        | 46.60        | 76.20        | 62.96        | 63.60          |
| 116 | TwoLeadECG                     | 42.84        | <b>54.34</b> | 47.87        | 49.99        | 50.48        | 52.61        | 50.59        | 44.02          |
| 117 | TwoPatterns                    | 46.82        | 41.01        | 79.68        | 24.85        | 63.          |              |              |                |

Table 9: The test classification accuracy (%) results on UCR archive with Asym 40% noisy labels.

| ID  | Dataset                        | Standard     | MixUp        | Co-teaching  | FINE         | SREA         | SELC         | CULCU        | Scale-teaching |
|-----|--------------------------------|--------------|--------------|--------------|--------------|--------------|--------------|--------------|----------------|
| 1   | ACSF1                          | 39.00        | 40.56        | 41.12        | 10.00        | 26.08        | 40.22        | 41.60        | <b>42.00</b>   |
| 2   | Adiac                          | 4.35         | 8.85         | 7.80         | 2.76         | 2.30         | 9.46         | 24.37        | <b>25.17</b>   |
| 3   | AllGestureWimoteX              | 34.60        | 39.66        | 35.47        | 28.15        | 12.32        | 38.83        | 38.33        | <b>46.83</b>   |
| 4   | AllGestureWimoteY              | 35.14        | 39.87        | 36.20        | 17.48        | 12.81        | 37.17        | 36.79        | <b>43.03</b>   |
| 5   | AllGestureWimoteZ              | 38.86        | 38.55        | 38.76        | 11.49        | 11.49        | 36.74        | 37.92        | <b>42.29</b>   |
| 6   | ArrowHead                      | 47.80        | 52.89        | 48.01        | 32.11        | 45.42        | <b>58.97</b> | 49.95        | 39.20          |
| 7   | BME                            | 39.00        | 48.03        | 42.40        | 40.53        | 47.07        | 45.60        | 41.60        | <b>49.33</b>   |
| 8   | Beef                           | 26.67        | <b>35.47</b> | 31.93        | 25.43        | 20.67        | 31.33        | 25.67        | 23.33          |
| 9   | BeetleFly                      | 43.00        | 51.40        | <b>56.50</b> | 50.00        | 55.00        | 53.00        | 55.50        | 40.00          |
| 10  | BirdChicken                    | 53.00        | 57.00        | 51.00        | 50.00        | 50.00        | 60.02        | 50.00        | <b>75.00</b>   |
| 11  | CBF                            | 56.20        | 70.29        | 73.80        | 33.38        | 68.84        | 71.91        | 66.21        | <b>74.22</b>   |
| 12  | Car                            | 57.12        | <b>60.47</b> | 54.83        | 24.67        | 23.00        | 54.33        | 53.47        | 44.00          |
| 13  | Chinatown                      | 59.47        | 55.11        | 57.26        | 45.51        | 63.48        | 55.42        | 58.41        | <b>67.25</b>   |
| 14  | ChlorineConcentration          | <b>55.85</b> | 49.69        | 49.52        | 41.18        | 47.22        | 49.48        | 48.58        | 51.10          |
| 15  | CinCECGTorso                   | 50.72        | 46.88        | 43.29        | 24.87        | 31.17        | <b>52.93</b> | 45.78        | 32.90          |
| 16  | Confer                         | 47.84        | 52.06        | <b>54.36</b> | 52.14        | 52.14        | 51.43        | 52.50        | 53.57          |
| 17  | Computers                      | 53.14        | 59.36        | 60.72        | 55.84        | <b>63.81</b> | 60.32        | 59.38        | 48.80          |
| 18  | CricketX                       | <b>58.64</b> | 36.59        | 30.97        | 7.79         | 10.77        | 36.21        | 40.05        | 35.85          |
| 19  | CricketY                       | <b>41.39</b> | 28.52        | 25.95        | 11.03        | 9.20         | 29.44        | 37.49        | 34.72          |
| 20  | CricketZ                       | 37.46        | 30.15        | 20.82        | 9.69         | 11.38        | 30.62        | <b>37.82</b> | 35.49          |
| 21  | Crop                           | 37.17        | 48.29        | 49.58        | 42.13        | <b>60.29</b> | 51.29        | 50.04        | 55.75          |
| 22  | DiatomSizeReduction            | 50.16        | 36.08        | 40.32        | 38.45        | 34.58        | 36.54        | 40.65        | <b>54.50</b>   |
| 23  | DistalPhalanxOutlineAgeGroup   | 37.44        | 63.65        | 62.79        | 36.98        | 64.03        | 65.04        | <b>65.14</b> | 46.76          |
| 24  | DistalPhalanxOutlineCorrect    | 59.68        | 58.04        | 65.69        | 45.00        | 48.99        | 63.04        | <b>66.45</b> | 64.39          |
| 25  | DistalPhalanxTW                | 55.32        | 56.83        | 57.84        | 25.18        | 47.05        | 58.71        | 58.56        | <b>64.03</b>   |
| 26  | DodgerLoopDay                  | 21.75        | 41.30        | 28.07        | 14.50        | 14.75        | 33.75        | 31.87        | <b>33.85</b>   |
| 27  | DodgerLoopEvening              | 50.22        | 41.30        | 52.97        | 49.57        | 51.30        | 54.20        | 49.13        | <b>64.78</b>   |
| 28  | DodgerLoopWeekend              | 62.61        | 70.64        | <b>80.87</b> | 64.35        | 35.94        | 73.48        | 70.43        | 70.61          |
| 29  | ECCG200                        | 46.80        | 40.80        | 65.80        | 41.60        | <b>68.80</b> | 46.20        | 60.60        | 61.00          |
| 30  | ECCG5000                       | 60.72        | 65.88        | 87.36        | 33.26        | 84.25        | 68.84        | 87.44        | <b>89.18</b>   |
| 31  | ECCGFiveDays                   | 63.06        | 54.75        | 61.29        | 50.06        | 57.21        | 65.85        | 53.39        | <b>66.52</b>   |
| 32  | EOGHorizontalSignal            | 40.13        | 35.14        | 36.88        | 34.48        | 8.57         | 33.87        | 30.62        | <b>42.32</b>   |
| 33  | EOGVerticalSignal              | 31.88        | 23.48        | 30.46        | 23.65        | 10.72        | 26.24        | 26.51        | <b>34.81</b>   |
| 34  | Earthquakes                    | 57.37        | 54.82        | 74.32        | 35.11        | <b>74.82</b> | 59.86        | 72.59        | <b>74.82</b>   |
| 35  | ElectricDevices                | 56.76        | 54.86        | 61.18        | 53.42        | 55.35        | <b>62.86</b> | 62.20        | 61.98          |
| 36  | EthanolLevel                   | 40.46        | 25.08        | 31.04        | 27.26        | 25.04        | 27.88        | 27.26        | <b>40.76</b>   |
| 37  | FaceAll                        | 47.52        | 40.04        | 46.85        | 4.76         | 15.21        | 49.74        | <b>50.94</b> | 45.74          |
| 38  | FaceFour                       | 48.09        | 50.50        | 41.14        | 49.32        | 41.36        | 50.23        | 43.86        | <b>57.73</b>   |
| 39  | FacesUCR                       | 50.18        | 41.29        | 44.42        | 8.71         | 20.75        | 50.51        | 50.36        | <b>51.02</b>   |
| 40  | FiftyWords                     | 22.20        | 13.71        | 24.20        | 27.43        | 9.32         | 23.38        | 20.59        | <b>30.90</b>   |
| 41  | Fish                           | 46.40        | <b>53.49</b> | 49.04        | 13.49        | 13.14        | 51.66        | 48.67        | 44.57          |
| 42  | FordA                          | 67.73        | 73.05        | 73.37        | 72.43        | 68.46        | 82.33        | 82.69        | <b>86.59</b>   |
| 43  | FordB                          | 53.11        | 55.56        | 62.88        | 55.45        | 57.95        | <b>63.47</b> | 62.81        | 60.20          |
| 44  | FreezerRegularTrain            | 65.85        | 72.20        | 60.40        | 62.23        | 62.31        | 71.78        | 61.32        | <b>75.44</b>   |
| 45  | FreezerSmallTrain              | 53.80        | 41.11        | 46.34        | 46.24        | 44.85        | 49.98        | 53.62        | <b>54.60</b>   |
| 46  | Fungi                          | <b>36.88</b> | 20.43        | 23.60        | 21.54        | 11.40        | 24.30        | 22.53        | 29.03          |
| 47  | GestureMidAirD1                | 22.31        | 16.15        | 17.31        | 9.85         | 7.69         | 20.15        | 23.77        | <b>43.23</b>   |
| 48  | GestureMidAirD2                | 20.46        | 14.31        | 21.15        | 4.00         | 6.92         | 17.85        | 24.26        | <b>28.46</b>   |
| 49  | GestureMidAirD3                | 11.54        | 7.69         | 12.69        | 6.92         | 5.54         | 12.92        | 12.51        | <b>15.38</b>   |
| 50  | GesturePebbleZ1                | 40.91        | 35.58        | 32.48        | 28.60        | 31.05        | 46.63        | 50.26        | <b>51.07</b>   |
| 51  | GesturePebbleZ2                | 41.04        | 36.46        | 40.19        | 30.00        | 25.82        | 44.56        | 44.16        | <b>48.99</b>   |
| 52  | GunPoint                       | 52.43        | 50.13        | 52.13        | 50.93        | 46.53        | <b>62.33</b> | 60.67        | 56.67          |
| 53  | GunPointAgeSpan                | 50.81        | 47.15        | 54.03        | 51.65        | 49.87        | <b>58.13</b> | 55.22        | <b>59.71</b>   |
| 54  | GunPointMaleVersusFemale       | 61.90        | 70.76        | 70.43        | 58.42        | 47.47        | 70.06        | 71.65        | <b>81.65</b>   |
| 55  | GunPointOldVersusYoung         | 68.90        | 66.81        | 77.03        | <b>85.46</b> | 47.62        | 72.44        | 82.76        | 82.79          |
| 56  | Ham                            | 47.39        | 44.19        | 48.46        | 50.29        | 47.81        | 50.29        | 50.53        | <b>51.43</b>   |
| 57  | HandOutlines                   | 64.49        | 61.41        | <b>65.95</b> | 59.03        | 64.05        | 63.08        | 65.40        | 58.65          |
| 58  | Haptics                        | 32.53        | <b>32.95</b> | 30.08        | 20.65        | 21.36        | 30.84        | 29.51        | 31.62          |
| 59  | Herring                        | 51.38        | 52.94        | 49.22        | 51.88        | 48.13        | <b>55.00</b> | 49.69        | 43.75          |
| 60  | HouseTwenty                    | 55.21        | 58.79        | 65.80        | 57.98        | 51.60        | 61.34        | 62.99        | <b>90.76</b>   |
| 61  | InlineSkate                    | 25.35        | 23.04        | 23.24        | 17.02        | 17.13        | 21.67        | <b>28.08</b> | 25.09          |
| 62  | InsectEPRRegularTrain          | 92.37        | 95.31        | 99.80        | 96.63        | 96.63        | 98.80        | 95.86        | <b>100.00</b>  |
| 63  | InsectEPGSmallTrain            | 67.72        | 60.59        | 75.74        | 65.86        | 76.35        | 73.01        | <b>79.00</b> | 35.74          |
| 64  | InsectWingbeatSound            | 18.96        | 18.37        | 23.88        | 9.09         | 9.09         | 22.58        | 22.57        | <b>26.31</b>   |
| 65  | ItalyPowerDemand               | 57.46        | 60.07        | 71.85        | 61.74        | 66.64        | 63.97        | 67.80        | <b>86.98</b>   |
| 66  | LargeKitchenAppliances         | 48.89        | 51.36        | 61.29        | 42.45        | 49.75        | <b>63.68</b> | 55.92        | 55.52          |
| 67  | Lightning2                     | 60.66        | 55.41        | 61.31        | 50.82        | 60.66        | 61.64        | 52.46        | <b>62.66</b>   |
| 68  | Lightning7                     | 34.25        | 38.93        | 35.59        | 23.56        | 30.41        | 40.27        | 35.32        | <b>41.64</b>   |
| 69  | Mallat                         | 36.98        | 41.82        | 36.69        | 12.40        | 12.45        | 39.82        | 34.62        | <b>44.43</b>   |
| 70  | Meat                           | 61.47        | <b>62.47</b> | 56.43        | 40.33        | 33.33        | 59.67        | 49.77        | 58.33          |
| 71  | MedicalImages                  | 80.07        | 47.26        | 53.24        | 80.07        | 51.45        | 53.03        | 57.31        | <b>59.66</b>   |
| 72  | MelbournePedestrian            | 62.07        | 67.72        | 69.20        | 34.30        | 23.03        | <b>71.67</b> | 68.21        | 67.41          |
| 73  | MiddlePhalanxOutlineAgeGroup   | 37.40        | 36.36        | 50.73        | 28.57        | <b>60.78</b> | 47.92        | 51.71        | 17.92          |
| 74  | MiddlePhalanxOutlineCorrect    | 60.78        | 53.54        | 58.49        | 54.23        | 57.04        | <b>63.44</b> | 57.56        | 60.14          |
| 75  | MiddlePhalanxTW                | 46.29        | 38.83        | 44.17        | 22.86        | 50.39        | 50.13        | <b>51.36</b> | 47.40          |
| 76  | MixedShapesRegularTrain        | 72.19        | 69.94        | 71.95        | 20.86        | 34.27        | <b>78.54</b> | 70.65        | 66.09          |
| 77  | MixedShapesSmallTrain          | 57.22        | <b>58.54</b> | 43.23        | 19.14        | 38.38        | 54.99        | 56.72        | 40.49          |
| 78  | MoteStrain                     | 54.76        | <b>54.80</b> | 51.66        | 50.78        | 52.50        | 54.06        | 48.68        | 46.09          |
| 79  | NonInvasiveFetalECGThorax1     | 23.77        | 17.39        | 7.20         | 2.25         | 3.34         | 17.69        | 27.93        | <b>55.65</b>   |
| 80  | NonInvasiveFetalECGThorax2     | 29.06        | 18.38        | 8.22         | 2.33         | 3.84         | 22.69        | 32.04        | <b>55.02</b>   |
| 81  | OSULeaf                        | 59.69        | 64.18        | 51.38        | 16.86        | 27.02        | 62.31        | 53.23        | <b>72.89</b>   |
| 82  | OliveOil                       | 37.33        | 36.00        | 36.00        | 30.67        | 35.33        | 35.33        | 35.33        | <b>40.00</b>   |
| 83  | PLAID                          | 29.13        | 28.23        | 23.36        | 21.38        | 12.51        | 29.24        | <b>33.02</b> | 18.44          |
| 84  | PhalangesOutlinesCorrect       | 61.56        | 59.63        | 59.69        | 62.43        | 56.78        | 65.22        | 64.63        | <b>66.43</b>   |
| 85  | Phoneme                        | 21.21        | 17.78        | 18.80        | 19.76        | 6.12         | 19.51        | <b>22.14</b> | 19.63          |
| 86  | PickupGestureWimoteZ           | 35.44        | 23.20        | 22.16        | 10.00        | 11.60        | 34.40        | 35.48        | <b>49.20</b>   |
| 87  | PigAirwayPressure              | 12.71        | 5.87         | 7.86         | 23.84        | 6.51         | 4.23         | 9.71         | <b>18.04</b>   |
| 88  | PigArtPressure                 | 15.31        | 9.62         | 8.64         | 7.87         | 1.92         | 10.96        | 22.12        | <b>30.38</b>   |
| 89  | PigCVP                         | 11.63        | 4.33         | 8.17         | 6.57         | 6.15         | 9.52         | 13.01        | <b>14.33</b>   |
| 90  | Plane                          | 70.29        | 65.87        | 61.14        | 13.52        | 69.71        | <b>70.81</b> | 69.52        | 49.52          |
| 91  | PowerCons                      | 60.04        | 58.60        | 77.33        | 50.00        | <b>80.42</b> | 63.33        | 74.67        | 63.56          |
| 92  | ProximalPhalanxOutlineAgeGroup | 58.65        | 59.43        | 45.77        | 38.34        | 67.22        | 65.17        | <b>72.59</b> | 71.71          |
| 93  | ProximalPhalanxOutlineCorrect  | 63.31        | 64.52        | <b>74.13</b> | 60.41        | 68.38        | 70.58        | 71.90        | 72.03          |
| 94  | ProximalPhalanxTW              | 60.04        | 61.83        | 56.26        | 28.59        | 50.73        | 66.34        | <b>70.82</b> | 68.39          |
| 95  | RefrigerationDevices           | 36.92        | 38.93        | 42.13        | 33.33        | <b>44.58</b> | 39.73        | 41.52        | 39.47          |
| 96  | Rock                           | 45.80        | 40.00        | 47.40        | 40.80        | 37.60        | <b>48.00</b> | 46.40        | 38.00          |
| 97  | ScreenType                     | 48.79        | <b>49.29</b> | 42.51        | 34.67        | 38.24        | 47.25        | 38.57        | 34.24          |
| 98  | SemgHandGestureCh2             | 57.31        | 57.87        | 53.92        | 49.59        | 53.00        | 58.30        | 53.72        | <b>62.27</b>   |
| 99  | SemgHandMovementCh2            | 40.74        | 38.34        | 40.29        | 29.73        | 23.94        | 37.91        | 39.29        | <b>40.89</b>   |
| 100 | SemgHandSubjectCh2             | 42.55        | <b>45.12</b> | 42.98        | 26.62        | 21.76        | 41.69        | 41.03        | 41.07          |
| 101 | ShakeGestureWimoteZ            | 39.92        | 42.72        | 31.08        | 15.84        | 24.80        | 40.00        | 40.40        | <b>52.00</b>   |
| 102 | ShapeletSim                    | 53.22        | 50.98        | 50.89        | 50.00        | <b>53.36</b> | 52.78        | 51.80        | 50.00          |
| 103 | ShapesAll                      | 30.23        | 19.95        | 25.54        | 2.13         | 1.67         | 20.60        | 24.84        | <b>49.00</b>   |
| 104 | SmallKitchenAppliances         | 58.25        | 61.06        | 67.06        | 47.93        | 60.85        | 64.48        | 68.20        | <b>69.01</b>   |
| 105 | SmoothSubspace                 | 61.87        | 60.29        | 72.67        | 33.33        | 59.17        | 61.07        | 71.89        | <b>73.87</b>   |
| 106 | SonyAIBORobotSurface1          | 69.88        | 70.49        | 70.67        | 51.41        | 75.13        | 70.18        | 69.55        | <b>78.37</b>   |
| 107 | SonyAIBORobotSurface2          | 60.08        | 60.90        | <b>63.00</b> | 57.02        | 57.31        | 59.62        | 62.61        | 46.90          |
| 108 | StarLightCurves                | 75.55        | 76.10        | 85.10        | 45.38        | 56.47        | 80.35        | 82.89        | <b>95.26</b>   |
| 109 | Strawberry                     | 71.12        | 74.83        | 74.65        | 41.41        | 64.33        | <b>76.03</b> | 69.16        | 66.92          |
| 110 | Sweatshirts                    | 67.77        | 64.08        | 68.43        | 6.82         | 21.98        | 69.04        | 63.31        | <b>70.29</b>   |
| 111 | Symbols                        | 55.45        | 48.60        | 49.18        | 52.31        | <b>56.72</b> | 50.05        | 50.50        | 45.29          |
| 112 | SyntheticControl               | 67.81        | 68.20        | 78.87        | 16.67        | 72.91        | 70.73        | <b>78.95</b> | 75.13          |
| 113 | ToeSegmentation1               | 51.96        | 52.39        | <b>62.72</b> | 49.47        | 59.42        | 53.07        | 47.96        | 41.67          |
| 114 | ToeSegmentation2               | 54.15        | 53.69        | <b>64.69</b> | 56.31        | 66.89        | 54.62        | 65.92        | <b>78.46</b>   |
| 115 | Trace                          | 51.52        | 53.36        | 46.32        | 29.20        | 50.00        | 59.60        | <b>60.34</b> | 42.40          |
| 116 | TwoLeadECG                     | 72.26        | 70.47        | 71.84        | 49.97        | 74.96        | 72.96        | 71.98        | <b>86.11</b>   |
| 117 | TwoPatterns                    | 63.84        | 46.01        | <b>78.65</b> |              |              |              |              |                |

Table 10: The test classification accuracy (%) results on UCR archive with Ins 40% noisy labels.

| ID  | Dataset                        | Standard | MixUp        | Co-teaching  | FINE         | SREA         | SELC         | CULCU        | Scale-teaching |
|-----|--------------------------------|----------|--------------|--------------|--------------|--------------|--------------|--------------|----------------|
| 1   | ACSF1                          | 35.40    | 39.08        | 43.00        | 14.80        | 29.20        | 41.40        | 42.70        | <b>45.00</b>   |
| 2   | Adiac                          | 8.33     | 9.73         | 7.29         | 4.57         | 2.35         | 9.77         | 19.93        | <b>27.16</b>   |
| 3   | AllGestureWimoteX              | 36.80    | 38.15        | 32.91        | 24.82        | 10.00        | 36.92        | 32.78        | <b>43.78</b>   |
| 4   | AllGestureWimoteY              | 39.82    | 39.10        | 37.02        | 23.39        | 10.03        | 38.80        | 37.83        | <b>46.49</b>   |
| 5   | AllGestureWimoteZ              | 31.95    | 31.15        | 33.87        | 15.43        | 11.51        | 33.91        | 32.04        | <b>38.78</b>   |
| 6   | ArrowHead                      | 42.27    | 45.97        | <b>48.32</b> | 32.11        | 38.51        | 41.26        | 34.06        | 42.03          |
| 7   | BME                            | 36.93    | 40.81        | 41.49        | 40.27        | 36.13        | 41.73        | 38.13        | <b>42.21</b>   |
| 8   | Beef                           | 31.33    | 33.00        | 35.67        | 20.00        | 22.67        | <b>36.33</b> | 33.93        | 29.33          |
| 9   | BeetleFly                      | 55.40    | 55.00        | 60.50        | 50.00        | 50.00        | 59.00        | 68.00        | <b>70.00</b>   |
| 10  | BirdChicken                    | 64.00    | 70.80        | 55.00        | 50.00        | 50.00        | <b>71.00</b> | 67.00        | 68.00          |
| 11  | CBF                            | 61.00    | 59.97        | 58.34        | 33.20        | 64.45        | <b>65.31</b> | 58.66        | 51.31          |
| 12  | Car                            | 49.80    | 49.80        | 50.50        | 24.67        | 26.33        | <b>50.67</b> | 40.03        | 45.60          |
| 13  | Chinatown                      | 62.96    | 62.11        | 58.87        | 54.49        | 45.51        | 62.94        | 59.10        | <b>64.53</b>   |
| 14  | ChlorineConcentration          | 41.58    | 43.47        | 43.05        | 35.27        | 35.96        | 44.63        | 43.55        | <b>45.55</b>   |
| 15  | CinCECGTorso                   | 37.14    | 49.42        | 41.05        | 35.70        | 30.52        | <b>50.39</b> | 45.08        | 46.80          |
| 16  | Coffee                         | 61.43    | 66.57        | 62.86        | 49.29        | 53.57        | 66.43        | 65.71        | <b>75.00</b>   |
| 17  | Computers                      | 41.92    | 54.16        | 51.12        | 47.28        | 51.60        | 54.00        | 54.28        | <b>54.48</b>   |
| 18  | CricketX                       | 33.79    | 35.04        | 23.45        | 7.95         | 10.62        | 38.26        | 44.06        | <b>46.39</b>   |
| 19  | CricketY                       | 44.24    | 36.55        | 31.28        | 8.77         | 9.33         | 35.38        | 42.40        | <b>47.48</b>   |
| 20  | CricketZ                       | 41.57    | 32.33        | 28.08        | 8.92         | 11.33        | 33.38        | 44.99        | <b>45.27</b>   |
| 21  | Crop                           | 53.52    | 53.74        | 56.48        | 44.60        | <b>63.37</b> | 54.45        | 56.94        | 63.25          |
| 22  | DiatomSizeReduction            | 62.35    | 71.07        | 55.82        | 30.00        | 30.20        | <b>72.12</b> | 45.77        | 67.36          |
| 23  | DistalPhalanxOutlineAgeGroup   | 47.25    | 49.29        | 59.12        | 45.04        | <b>62.30</b> | 49.35        | 57.99        | 51.83          |
| 24  | DistalPhalanxOutlineCorrect    | 53.12    | 56.22        | <b>66.17</b> | 51.67        | 55.87        | 64.42        | 59.57        | 63.12          |
| 25  | DistalPhalanxTW                | 50.76    | 52.23        | 56.63        | 25.47        | 49.35        | 52.23        | 57.77        | <b>59.42</b>   |
| 26  | DodgerLoopDay                  | 26.20    | 29.05        | 30.07        | 13.75        | 15.00        | 30.25        | 26.00        | <b>31.25</b>   |
| 27  | DodgerLoopEvening              | 55.22    | 56.87        | 53.64        | 48.75        | 52.17        | 56.23        | 52.01        | <b>56.93</b>   |
| 28  | DodgerLoopWeekend              | 58.84    | 56.29        | 68.84        | 45.22        | 54.78        | 58.99        | <b>69.90</b> | 57.19          |
| 29  | ECCG200                        | 61.40    | 63.20        | 61.40        | 52.80        | 64.52        | 61.40        | 67.30        | <b>67.40</b>   |
| 30  | ECCG5000                       | 73.57    | 71.83        | 89.10        | 49.16        | 90.76        | 82.03        | 90.46        | <b>91.12</b>   |
| 31  | ECCGFiveDays                   | 54.18    | 52.99        | 56.27        | 50.06        | 51.91        | 55.08        | 50.88        | <b>59.77</b>   |
| 32  | EOGHorizontalSignal            | 37.19    | 29.45        | 35.52        | 31.96        | 10.70        | 28.73        | 28.86        | <b>39.51</b>   |
| 33  | EOGVerticalSignal              | 26.15    | 26.60        | 25.62        | 23.43        | 9.83         | 23.59        | 21.59        | <b>27.16</b>   |
| 34  | Earthquakes                    | 60.12    | 58.76        | 71.24        | <b>74.82</b> | <b>74.82</b> | 60.29        | 72.50        | 72.09          |
| 35  | ElectricDevices                | 68.39    | <b>69.51</b> | 68.90        | 67.86        | 60.71        | 68.57        | 68.82        | 64.59          |
| 36  | EthanolLevel                   | 25.15    | 31.18        | <b>32.74</b> | 24.88        | 25.12        | 27.76        | 32.14        | 32.40          |
| 37  | FaceAll                        | 56.89    | 57.34        | 52.64        | 49.87        | 17.49        | <b>59.91</b> | 53.41        | 57.25          |
| 38  | FaceFour                       | 57.36    | <b>60.00</b> | 58.07        | 21.36        | 31.50        | 58.41        | 38.75        | 47.68          |
| 39  | FacesUCR                       | 48.81    | 42.41        | 48.23        | 7.53         | 14.25        | <b>50.26</b> | 46.51        | 48.29          |
| 40  | FiftyWords                     | 32.49    | 27.16        | 35.93        | 28.56        | 10.73        | 29.80        | 29.78        | <b>40.44</b>   |
| 41  | Fish                           | 37.99    | 40.66        | 37.71        | 19.43        | 13.94        | 37.49        | 37.70        | <b>40.94</b>   |
| 42  | FordA                          | 68.92    | 71.77        | 80.55        | 59.04        | 69.17        | 82.76        | <b>83.39</b> | 81.52          |
| 43  | FordB                          | 60.70    | 62.61        | <b>70.78</b> | 61.02        | 57.93        | 68.99        | 67.27        | 66.54          |
| 44  | FreezerRegularTrain            | 71.31    | <b>74.21</b> | 54.41        | 59.09        | 52.78        | 71.61        | 61.98        | 62.43          |
| 45  | FreezerSmallTrain              | 55.52    | 55.64        | 57.34        | 44.18        | 44.88        | 52.60        | <b>58.16</b> | 52.53          |
| 46  | Fungi                          | 23.28    | 14.41        | <b>24.48</b> | 20.51        | 11.08        | 14.52        | 19.78        | 18.09          |
| 47  | GestureMidAirD1                | 28.15    | 16.92        | 19.23        | 19.14        | 12.12        | 23.54        | 25.17        | <b>39.17</b>   |
| 48  | GestureMidAirD2                | 13.51    | 6.46         | 13.46        | 4.92         | 7.78         | 11.85        | 15.82        | <b>22.58</b>   |
| 49  | GestureMidAirD3                | 12.77    | 9.08         | 11.15        | 11.23        | 5.08         | 11.85        | 12.58        | <b>13.91</b>   |
| 50  | GesturePebbleZ1                | 50.65    | 44.05        | 47.09        | 26.77        | 38.63        | 44.77        | 51.41        | <b>52.12</b>   |
| 51  | GesturePebbleZ2                | 56.73    | 50.56        | 53.35        | 36.20        | 33.80        | 56.48        | 54.16        | <b>59.27</b>   |
| 52  | GunPoint                       | 60.05    | <b>66.69</b> | 55.13        | 48.40        | 47.73        | 60.00        | 56.40        | 52.40          |
| 53  | GunPointAgeSpan                | 59.49    | <b>60.59</b> | 57.06        | 51.38        | 49.62        | 60.57        | 57.51        | 53.11          |
| 54  | GunPointMaleVersusFemale       | 66.18    | 63.11        | 67.59        | 49.87        | 47.47        | 65.63        | 61.22        | <b>76.27</b>   |
| 55  | GunPointOldVersusYoung         | 87.24    | 90.18        | 93.52        | 78.29        | 48.57        | 90.79        | 96.10        | <b>99.56</b>   |
| 56  | Ham                            | 59.81    | 57.45        | 56.23        | 48.57        | 49.71        | <b>59.90</b> | 56.57        | 51.24          |
| 57  | HandOutlines                   | 65.57    | <b>66.36</b> | 65.38        | 64.32        | 64.05        | 66.16        | 66.35        | 64.28          |
| 58  | Haptics                        | 27.40    | <b>26.70</b> | 26.19        | 19.81        | 20.06        | 28.53        | 26.92        | 27.97          |
| 59  | Herring                        | 53.50    | 55.81        | 54.06        | 51.88        | 51.88        | 56.56        | 52.53        | <b>58.56</b>   |
| 60  | HouseTwenty                    | 70.39    | 57.14        | 63.24        | 48.60        | 54.79        | <b>71.26</b> | 48.35        | 69.41          |
| 61  | InlineSkate                    | 19.67    | 15.75        | 19.49        | 16.00        | 14.18        | 18.62        | 20.16        | <b>21.11</b>   |
| 62  | InsectEPRRegularTrain          | 69.43    | 71.18        | 83.90        | 85.38        | <b>87.15</b> | 72.45        | 71.53        | 65.06          |
| 63  | InsectEPGSmallTrain            | 67.34    | 71.52        | 89.88        | 56.63        | 72.57        | 74.70        | <b>93.10</b> | 86.84          |
| 64  | InsectWingbeatSound            | 20.47    | 14.26        | 22.87        | 9.09         | 9.32         | 18.90        | 19.40        | <b>25.99</b>   |
| 65  | ItalyPowerDemand               | 67.35    | 65.53        | 71.10        | 69.91        | 69.69        | 69.23        | <b>64.63</b> | 63.76          |
| 66  | LargeKitchenAppliances         | 72.12    | 69.65        | 77.86        | 46.08        | 46.59        | <b>78.36</b> | 72.84        | 73.00          |
| 67  | Lightning2                     | 56.72    | 54.10        | 56.89        | 54.43        | 55.74        | <b>60.98</b> | 58.69        | 55.08          |
| 68  | Lightning7                     | 36.15    | 35.62        | 33.15        | 19.18        | 26.03        | 35.62        | 38.77        | <b>39.12</b>   |
| 69  | Mallat                         | 35.91    | 26.42        | 33.05        | 15.43        | 12.47        | 33.39        | 31.37        | <b>40.87</b>   |
| 70  | Meat                           | 46.60    | <b>49.73</b> | 45.63        | 33.33        | 33.33        | 47.67        | 43.17        | 46.20          |
| 71  | MedicalImages                  | 52.91    | 44.42        | 53.83        | 51.45        | 49.08        | 52.29        | 50.81        | <b>55.41</b>   |
| 72  | MelbournePedestrian            | 68.53    | 62.94        | 69.50        | 39.53        | 22.90        | 71.26        | 70.95        | <b>71.68</b>   |
| 73  | MiddlePhalanxOutlineAgeGroup   | 46.52    | 36.88        | 51.09        | 27.53        | <b>61.69</b> | 49.09        | 44.71        | 47.53          |
| 74  | MiddlePhalanxOutlineCorrect    | 59.27    | 52.51        | 55.14        | 48.59        | 51.41        | <b>60.10</b> | 53.33        | 51.07          |
| 75  | MiddlePhalanxTW                | 43.71    | 39.64        | 40.52        | 21.30        | 34.16        | 45.97        | <b>50.82</b> | 45.06          |
| 76  | MixedShapesRegularTrain        | 79.62    | 78.52        | 71.27        | 22.80        | 38.91        | <b>83.27</b> | 67.12        | 67.12          |
| 77  | MixedShapesSmallTrain          | 59.86    | 51.69        | 49.41        | 21.01        | 21.18        | 62.99        | <b>63.29</b> | 51.54          |
| 78  | MotesTrain                     | 73.52    | 73.10        | 70.78        | 49.22        | 72.73        | 72.83        | <b>76.43</b> | 67.14          |
| 79  | NonInvasiveFetalECGThorax1     | 16.24    | 8.66         | 9.92         | 2.39         | 2.92         | 12.31        | 18.02        | <b>44.45</b>   |
| 80  | NonInvasiveFetalECGThorax2     | 20.81    | 8.60         | 11.22        | 2.15         | 3.21         | 13.57        | 18.03        | <b>41.88</b>   |
| 81  | OSULeaf                        | 63.10    | 62.63        | 59.86        | 16.03        | 27.01        | 60.25        | <b>65.83</b> | 61.97          |
| 82  | OliveOil                       | 44.13    | 40.00        | 40.00        | 40.00        | 40.00        | 38.00        | 38.00        | <b>48.67</b>   |
| 83  | PLAID                          | 29.83    | 25.33        | 27.60        | 15.12        | 13.61        | 29.24        | 34.59        | 28.27          |
| 84  | PhalangesOutlinesCorrect       | 61.60    | 62.49        | 59.80        | 63.26        | 57.18        | 63.62        | 59.61        | <b>64.61</b>   |
| 85  | Phoneme                        | 21.55    | 16.32        | 19.59        | 17.21        | 7.01         | 19.76        | 22.79        | 20.79          |
| 86  | PickupGestureWimoteZ           | 31.68    | 19.20        | 27.16        | 10.53        | 11.20        | 31.20        | 30.08        | <b>33.92</b>   |
| 87  | PigAirwayPressure              | 11.88    | 7.46         | 7.88         | 8.21         | 3.08         | 6.92         | 11.13        | <b>12.04</b>   |
| 88  | PigArtPressure                 | 15.13    | 6.15         | 11.54        | 6.98         | 2.31         | 9.13         | 17.62        | <b>21.46</b>   |
| 89  | PigCVP                         | 9.79     | 4.33         | 10.14        | 9.14         | 5.62         | 7.69         | 10.26        | <b>13.73</b>   |
| 90  | Plane                          | 62.48    | 62.48        | 64.48        | 16.19        | 55.62        | 63.81        | <b>65.33</b> | 60.95          |
| 91  | PowerCons                      | 63.16    | 59.78        | 82.72        | 57.78        | 83.13        | 66.44        | 78.78        | <b>83.36</b>   |
| 92  | ProximalPhalanxOutlineAgeGroup | 56.55    | 56.20        | 65.85        | 40.68        | 71.61        | 63.41        | 70.54        | 52.37          |
| 93  | ProximalPhalanxOutlineCorrect  | 63.20    | 57.94        | 70.27        | 38.97        | 67.29        | 71.75        | 71.62        | <b>72.01</b>   |
| 94  | ProximalPhalanxTW              | 65.05    | 65.37        | 65.71        | 28.39        | 59.90        | 71.41        | <b>78.99</b> | 67.61          |
| 95  | RefrigerationDevices           | 45.06    | 44.21        | 48.03        | 33.33        | <b>48.37</b> | 46.61        | 45.90        | 48.17          |
| 96  | Rock                           | 27.60    | 22.00        | 30.20        | 30.45        | 28.40        | 25.60        | <b>31.40</b> | 24.00          |
| 97  | ScreenType                     | 52.44    | <b>52.54</b> | 46.09        | 33.33        | 36.76        | 51.57        | 41.09        | 44.11          |
| 98  | SemgHandGestureCh2             | 56.55    | 57.53        | 56.38        | 51.73        | 53.00        | <b>58.67</b> | 53.10        | 53.46          |
| 99  | SemgHandMovementCh2            | 37.29    | 38.23        | 39.48        | 31.37        | 19.76        | 39.29        | 38.61        | <b>41.26</b>   |
| 100 | SemgHandSubjectCh2             | 45.22    | <b>46.83</b> | 42.37        | 32.09        | 21.56        | 44.58        | 39.74        | 45.29          |
| 101 | ShakeGestureWimoteZ            | 40.72    | 36.32        | 34.76        | 29.87        | 26.40        | 46.80        | <b>47.20</b> | 35.20          |
| 102 | ShapeletSim                    | 50.64    | 48.11        | 45.98        | 50.00        | 50.67        | 49.89        | 49.83        | <b>54.40</b>   |
| 103 | ShapesAll                      | 21.13    | 8.83         | 23.58        | 5.17         | 1.67         | 17.93        | 21.32        | <b>46.39</b>   |
| 104 | SmallKitchenAppliances         | 64.45    | 63.04        | <b>75.88</b> | 42.99        | 68.84        | 71.41        | 71.08        | 71.25          |
| 105 | SmoothSubspace                 | 59.87    | 59.84        | 66.68        | 33.33        | 59.33        | 59.07        | <b>67.87</b> | 55.17          |
| 106 | SonyAIBORobotSurface1          | 52.88    | 41.55        | 47.93        | 48.59        | 58.26        | 51.81        | <b>61.59</b> | 51.20          |
| 107 | SonyAIBORobotSurface2          | 55.56    | 50.47        | 56.68        | 57.02        | 58.35        | 55.91        | 60.81        | <b>61.90</b>   |
| 108 | StarLightCurves                | 75.50    | 83.51        | 88.16        | 62.79        | 76.77        | 86.72        | 89.08        | <b>89.53</b>   |
| 109 | Strawberry                     | 66.81    | 74.46        | 73.24        | 58.71        | 52.86        | <b>76.27</b> | 60.43        | 56.30          |
| 110 | SweatshirtsLeaf                | 63.31    | 52.42        | 62.11        | 6.50         | 19.81        | 65.02        | 56.70        | <b>65.67</b>   |
| 111 | Symbols                        | 43.34    | <b>47.40</b> | 41.84        | 41.31        | 42.72        | 46.63        | 39.23        | 44.29          |
| 112 | SyntheticControl               | 70.73    | 73.53        | 86.83        | 16.67        | 82.20        | 78.73        | <b>88.07</b> | 82.87          |
| 113 | ToeSegmentation1               | 66.02    | 64.84        | 71.32        | 52.63        | <b>71.75</b> | 64.82        | 67.96        | 65.09          |
| 114 | ToeSegmentation2               | 69.38    | 72.49        | 71.54        | 43.69        | <b>73.88</b> | 71.38        | 68.15        | 69.35          |
| 115 | Trace                          | 63.48    | <b>73.64</b> | 51.00        | 20.00        | 46.80        | 69.80        | 65.16        | 52.16          |
| 116 | TwoLeadECG                     | 61.86    | 57.53        | 50.69        | 49.99        | <b>62.05</b> | 59.74        | 53.03        | 51.71          |
| 117 | TwoPatterns                    | 58.48    | 49.17        | 84.69        | 24.87        | 85.27        | 73.59        |              |                |

Table 11: The detailed test classification accuracy (%) results on UEA 30 archive with Sym 20% noisy labels.

| ID | Dataset                   | Standard | MixUp        | Co-teaching  | FINE         | SREA         | SELC         | CULCU        | Scale-teaching |
|----|---------------------------|----------|--------------|--------------|--------------|--------------|--------------|--------------|----------------|
| 1  | ArticularyWordRecognition | 89.33    | 81.04        | 81.77        | 41.07        | 90.13        | 87.87        | 84.33        | <b>92.73</b>   |
| 2  | AtrialFibrillation        | 26.67    | 25.67        | 26.67        | <b>33.33</b> | 26.67        | 26.67        | 22.67        | 28.00          |
| 3  | BasicMotions              | 97.10    | 97.40        | <b>99.25</b> | 91.00        | 97.50        | 98.00        | 97.50        | 95.50          |
| 4  | CharacterTrajectories     | 98.16    | 98.49        | 92.59        | 7.45         | 96.54        | <b>98.93</b> | 98.66        | <b>98.93</b>   |
| 5  | Cricket                   | 94.72    | 94.17        | 91.53        | 41.11        | <b>97.50</b> | 96.67        | 93.89        | 97.28          |
| 6  | DuckDuckGeese             | 48.40    | <b>52.48</b> | 48.60        | 24.40        | 46.80        | 50.00        | 49.60        | 45.60          |
| 7  | EigenWorms                | 53.56    | 55.42        | 62.88        | 34.66        | 61.80        | <b>64.58</b> | 64.10        | 61.25          |
| 8  | Epilepsy                  | 84.96    | 80.28        | <b>93.33</b> | 82.46        | 88.70        | 86.38        | <b>93.33</b> | 87.59          |
| 9  | EthanolConcentration      | 24.15    | 25.48        | 26.43        | 24.71        | 25.11        | 24.87        | 24.39        | <b>27.42</b>   |
| 10 | ERing                     | 73.11    | <b>73.70</b> | 70.04        | 16.67        | 64.59        | 72.59        | 61.70        | 72.77          |
| 11 | FaceDetection             | 52.90    | 51.93        | 52.36        | 51.96        | 50.93        | 52.30        | 52.69        | <b>53.09</b>   |
| 12 | FingerMovements           | 50.80    | 50.44        | 52.76        | 52.20        | 50.20        | 52.80        | 52.30        | <b>54.68</b>   |
| 13 | HandMovementDirection     | 28.92    | 32.22        | 35.14        | 24.05        | 19.46        | 28.11        | 29.16        | <b>35.35</b>   |
| 14 | Handwriting               | 35.71    | 28.55        | 30.71        | 25.31        | 16.63        | 28.19        | 34.12        | <b>41.35</b>   |
| 15 | Heartbeat                 | 52.00    | 52.93        | 57.46        | <b>72.10</b> | 62.75        | 50.17        | 66.39        | 51.76          |
| 16 | InsectWingbeat            | 62.31    | 53.90        | 64.74        | 63.92        | 51.56        | 64.63        | <b>64.75</b> | 63.85          |
| 17 | JapaneseVowels            | 88.99    | 87.61        | 94.70        | 49.73        | <b>97.41</b> | 93.51        | 97.19        | 95.62          |
| 18 | Libras                    | 74.60    | 70.07        | 77.00        | 10.78        | 73.22        | 76.78        | 70.83        | <b>79.67</b>   |
| 19 | LSST                      | 49.68    | 48.91        | 50.23        | 51.61        | 35.53        | 50.48        | 51.91        | <b>55.16</b>   |
| 20 | MotorImagery              | 51.00    | 50.88        | 51.60        | 50.80        | <b>55.92</b> | 52.80        | 50.10        | 50.84          |
| 21 | NATOPS                    | 80.78    | 80.40        | 90.56        | 25.78        | 89.33        | 82.67        | 87.17        | <b>91.11</b>   |
| 22 | PenDigits                 | 96.04    | 97.58        | 97.33        | <b>98.30</b> | 97.90        | 98.27        | 98.16        | 98.12          |
| 23 | PEMS-SF                   | 62.08    | 62.87        | 60.06        | 14.91        | <b>64.97</b> | 62.08        | 61.10        | 63.05          |
| 24 | PhonemeSpectra            | 21.89    | 23.46        | 22.25        | 18.00        | 6.23         | 22.82        | 23.74        | <b>26.50</b>   |
| 25 | RacketSports              | 76.84    | 73.50        | 78.64        | 25.00        | 75.74        | 77.24        | <b>79.41</b> | 76.87          |
| 26 | SelfRegulationSCP1        | 76.81    | 77.49        | 78.91        | 56.86        | 49.83        | 78.43        | 77.55        | <b>81.28</b>   |
| 27 | SelfRegulationSCP2        | 47.47    | 49.24        | 48.32        | 50.89        | 50.00        | 47.44        | 50.66        | <b>51.78</b>   |
| 28 | SpokenArabicDigits        | 96.17    | 96.21        | 98.83        | 27.79        | 98.52        | 98.67        | 98.71        | <b>99.18</b>   |
| 29 | StandWalkJump             | 44.00    | 40.00        | 36.00        | 33.33        | <b>45.33</b> | 42.67        | 33.40        | 34.13          |
| 30 | UWaveGestureLibrary       | 76.90    | 76.97        | 74.61        | 12.50        | 74.29        | 77.75        | 66.97        | <b>78.12</b>   |
|    | <b>Avg Acc</b>            | 63.87    | 62.98        | 64.84        | 40.42        | 62.04        | 64.81        | 64.55        | <b>66.29</b>   |
|    | <b>Avg Rank</b>           | 5.03     | 5.20         | 3.83         | 6.37         | 4.77         | 3.73         | 4.00         | <b>2.73</b>    |
|    | <b>P-value</b>            | 6.61E-04 | 3.33E-04     | 2.69E-02     | 2.37E-05     | 1.14E-02     | 2.63E-02     | 3.93E-02     | -              |

Table 12: The detailed test classification accuracy (%) results on UEA 30 archive with Sym 50% noisy labels.

| ID | Dataset                   | Standard | MixUp        | Co-teaching  | FINE     | SREA         | SELC         | CULCU        | Scale-teaching |
|----|---------------------------|----------|--------------|--------------|----------|--------------|--------------|--------------|----------------|
| 1  | ArticularyWordRecognition | 66.64    | 55.57        | 52.12        | 7.53     | 67.33        | 57.40        | 49.63        | <b>68.68</b>   |
| 2  | AtrialFibrillation        | 28.00    | 26.67        | 29.33        | 33.33    | 29.33        | 30.67        | 32.00        | <b>36.00</b>   |
| 3  | BasicMotions              | 56.00    | 58.20        | 70.75        | 54.50    | <b>81.00</b> | 59.00        | 71.25        | 60.20          |
| 4  | CharacterTrajectories     | 90.62    | 87.56        | 67.75        | 6.73     | 95.28        | 93.82        | 97.03        | <b>97.23</b>   |
| 5  | Cricket                   | 67.44    | 60.00        | 68.89        | 8.33     | 84.28        | 66.67        | 68.06        | <b>87.27</b>   |
| 6  | DuckDuckGeese             | 32.00    | <b>36.64</b> | 29.60        | 26.00    | 34.00        | 33.20        | 33.20        | 33.84          |
| 7  | EigenWorms                | 49.62    | 45.37        | 55.65        | 32.98    | 38.78        | <b>56.79</b> | 56.09        | 49.28          |
| 8  | Epilepsy                  | 57.39    | 57.25        | 64.16        | 36.38    | 62.62        | 60.00        | 63.55        | <b>64.36</b>   |
| 9  | EthanolConcentration      | 25.20    | 25.32        | 26.05        | 25.02    | <b>27.56</b> | 25.62        | 24.58        | 26.27          |
| 10 | ERing                     | 44.30    | 44.39        | 40.63        | 16.67    | 39.35        | 44.52        | 38.54        | <b>45.10</b>   |
| 11 | FaceDetection             | 48.54    | 49.81        | 49.30        | 49.51    | 48.94        | 49.11        | 48.58        | <b>50.72</b>   |
| 12 | FingerMovements           | 50.40    | 50.20        | 51.80        | 51.40    | 50.60        | 50.80        | 51.30        | <b>54.40</b>   |
| 13 | HandMovementDirection     | 26.22    | 25.51        | 25.41        | 26.11    | 23.51        | 26.57        | 24.35        | <b>27.08</b>   |
| 14 | Handwriting               | 19.54    | 19.53        | 19.99        | 13.41    | 7.53         | 19.18        | 18.28        | <b>21.06</b>   |
| 15 | Heartbeat                 | 55.32    | 53.52        | 52.20        | 54.44    | <b>55.40</b> | 54.63        | 53.27        | 48.62          |
| 16 | InsectWingbeat            | 49.30    | 32.34        | 58.02        | 52.25    | 31.07        | 53.97        | <b>58.13</b> | 52.01          |
| 17 | JapaneseVowels            | 60.14    | 59.28        | 73.97        | 15.03    | 70.65        | 66.43        | 78.11        | <b>79.23</b>   |
| 18 | Libras                    | 47.09    | 43.98        | <b>51.39</b> | 6.67     | 44.78        | 50.11        | 40.06        | 49.78          |
| 19 | LSST                      | 47.29    | 44.58        | 46.21        | 47.89    | 34.35        | 46.33        | 47.92        | <b>48.75</b>   |
| 20 | MotorImagery              | 50.84    | 51.48        | 50.10        | 51.40    | <b>52.00</b> | 50.60        | 49.70        | 49.80          |
| 21 | NATOPS                    | 54.33    | 52.53        | <b>60.17</b> | 16.67    | 59.80        | 53.44        | 58.06        | 59.56          |
| 22 | PenDigits                 | 93.38    | 85.29        | 95.92        | 92.85    | 92.74        | <b>96.80</b> | 96.53        | 93.89          |
| 23 | PEMS-SF                   | 41.20    | 40.55        | 32.96        | 14.45    | 42.43        | <b>43.24</b> | 37.57        | 41.27          |
| 24 | PhonemeSpectra            | 19.08    | 19.11        | 19.94        | 11.48    | 3.92         | 19.69        | 19.23        | <b>20.09</b>   |
| 25 | RacketSports              | 52.50    | 51.03        | 52.80        | 24.08    | 53.29        | 52.89        | <b>56.58</b> | 54.21          |
| 26 | SelfRegulationSCP1        | 47.41    | 42.68        | 48.86        | 48.60    | 49.97        | 48.33        | 57.93        | <b>58.08</b>   |
| 27 | SelfRegulationSCP2        | 48.13    | 48.22        | 47.61        | 48.78    | <b>50.00</b> | 49.22        | <b>50.00</b> | 48.73          |
| 28 | SpokenArabicDigits        | 85.64    | 69.95        | 96.55        | 96.16    | <b>99.23</b> | 95.66        | 97.59        | 97.69          |
| 29 | StandWalkJump             | 38.67    | 37.87        | 40.67        | 33.33    | 42.67        | 42.67        | 37.33        | <b>44.00</b>   |
| 30 | UWaveGestureLibrary       | 50.41    | 48.60        | 45.45        | 12.50    | <b>53.91</b> | 49.00        | 37.94        | 52.61          |
|    | <b>Avg Acc</b>            | 50.09    | 47.43        | 50.81        | 33.82    | 50.88        | 51.55        | 51.75        | <b>53.99</b>   |
|    | <b>Avg Rank</b>           | 5.17     | 5.73         | 4.23         | 6.23     | 3.93         | 3.83         | 4.30         | <b>2.43</b>    |
|    | <b>P-value</b>            | 2.98E-04 | 7.40E-05     | 1.59E-02     | 9.35E-05 | 1.67E-02     | 1.08E-02     | 3.75E-02     | -              |

Table 13: The detailed test classification accuracy (%) results on UEA 30 archive with Asym 40% noisy labels.

| ID              | Dataset                   | Standard | MixUp        | Co-teaching  | FINE         | SREA         | SELC         | CULCU        | Scale-teaching |
|-----------------|---------------------------|----------|--------------|--------------|--------------|--------------|--------------|--------------|----------------|
| 1               | ArticularyWordRecognition | 66.33    | 62.40        | 55.87        | 17.27        | 69.40        | 63.67        | 53.73        | <b>70.44</b>   |
| 2               | AtrialFibrillation        | 21.67    | 33.33        | 33.33        | 33.33        | 11.33        | 33.67        | 32.67        | <b>34.67</b>   |
| 3               | BasicMotions              | 66.00    | 62.30        | 67.25        | 49.50        | <b>69.00</b> | 64.00        | 61.75        | 65.10          |
| 4               | CharacterTrajectories     | 61.08    | 60.01        | 57.42        | 19.05        | 87.78        | 64.29        | 61.35        | <b>88.34</b>   |
| 5               | Cricket                   | 72.22    | 71.56        | 70.97        | 50.00        | 73.44        | 72.78        | 68.61        | <b>80.56</b>   |
| 6               | DuckDuckGeese             | 43.20    | 42.96        | 44.80        | 24.00        | 43.68        | <b>45.20</b> | 44.60        | 38.24          |
| 7               | EigenWorms                | 41.75    | 34.75        | <b>51.34</b> | 37.86        | 43.56        | 41.68        | 50.38        | 42.47          |
| 8               | Epilepsy                  | 62.32    | 63.01        | 63.48        | 47.25        | 61.01        | 61.45        | <b>64.71</b> | 58.70          |
| 9               | EthanolConcentration      | 23.04    | 23.85        | 23.61        | 25.02        | 24.78        | 24.33        | 25.57        | <b>27.70</b>   |
| 10              | ERing                     | 60.30    | 60.37        | 42.74        | 39.47        | 45.56        | 59.11        | 43.96        | <b>61.74</b>   |
| 11              | FaceDetection             | 49.88    | 50.64        | 51.12        | 51.06        | 50.32        | 51.07        | 50.12        | <b>51.61</b>   |
| 12              | FingerMovements           | 47.76    | 49.92        | 48.50        | 49.80        | 49.00        | 48.20        | 50.19        | <b>50.96</b>   |
| 13              | HandMovementDirection     | 28.97    | 31.24        | 30.41        | 28.38        | <b>31.46</b> | 29.19        | 29.73        | 29.03          |
| 14              | Handwriting               | 21.61    | 23.92        | 24.74        | 21.03        | 10.67        | 22.99        | 25.69        | <b>26.98</b>   |
| 15              | Heartbeat                 | 55.22    | 57.46        | 55.61        | <b>72.20</b> | 61.52        | 55.12        | 55.51        | 56.68          |
| 16              | InsectWingbeat            | 43.40    | 38.07        | 45.34        | 46.32        | 48.78        | 47.81        | 50.34        | <b>51.87</b>   |
| 17              | JapaneseVowels            | 61.62    | 58.63        | 62.46        | 36.81        | 65.97        | 64.27        | <b>73.76</b> | 70.02          |
| 18              | Libras                    | 57.47    | 57.00        | 53.39        | 8.67         | 54.33        | 59.44        | 45.72        | <b>63.22</b>   |
| 19              | LSST                      | 42.11    | 42.77        | 41.70        | 43.67        | 32.79        | 43.67        | <b>43.74</b> | 29.10          |
| 20              | MotorImagery              | 48.80    | 50.24        | 51.32        | 53.00        | 52.60        | 49.60        | 49.70        | <b>53.20</b>   |
| 21              | NATOPS                    | 57.00    | 55.29        | 58.65        | 16.67        | 64.89        | 55.89        | 63.22        | <b>65.13</b>   |
| 22              | PenDigits                 | 78.76    | 67.36        | 92.78        | 84.05        | 91.07        | 89.18        | 92.23        | <b>93.57</b>   |
| 23              | PEMS-SF                   | 50.20    | 51.38        | 42.60        | 14.45        | 50.87        | 50.76        | 47.86        | <b>51.45</b>   |
| 24              | PhonemeSpectra            | 17.71    | 19.05        | 18.70        | 14.41        | 5.11         | 18.02        | 18.65        | <b>19.52</b>   |
| 25              | RacketSports              | 57.50    | <b>59.13</b> | 54.30        | 27.50        | 55.26        | 58.16        | 56.32        | 54.21          |
| 26              | SelfRegulationSCP1        | 63.47    | 66.21        | 64.94        | 60.96        | 49.83        | 66.42        | <b>68.10</b> | 66.30          |
| 27              | SelfRegulationSCP2        | 49.04    | 51.24        | 51.20        | <b>52.16</b> | 50.00        | 52.11        | 51.26        | 51.22          |
| 28              | SpokenArabicDigits        | 64.19    | 60.64        | 79.13        | 72.11        | <b>99.04</b> | 79.42        | 88.10        | 93.85          |
| 29              | StandWalkJump             | 38.67    | 34.67        | 39.33        | 33.33        | 33.33        | <b>40.00</b> | 39.33        | 36.27          |
| 30              | UWaveGestureLibrary       | 53.56    | 53.36        | 55.38        | 12.50        | <b>57.81</b> | 53.69        | 45.53        | 55.84          |
| <b>Avg Acc</b>  |                           | 50.16    | 49.76        | 51.08        | 38.06        | 51.47        | 52.17        | 51.75        | <b>54.60</b>   |
| <b>Avg Rank</b> |                           | 5.60     | 4.77         | 4.40         | 6.13         | 4.20         | 4.00         | 3.97         | <b>2.73</b>    |
| <b>P-value</b>  |                           | 3.81E-03 | 6.17E-03     | 1.63E-02     | 9.33E-05     | 1.36E-02     | 2.62E-02     | 3.88E-02     | -              |

Table 14: The detailed test classification accuracy (%) results on UEA 30 archive with Ins 40% noisy labels.

| ID              | Dataset                   | Standard | MixUp        | Co-teaching  | FINE     | SREA         | SELC         | CULCU        | Scale-teaching |
|-----------------|---------------------------|----------|--------------|--------------|----------|--------------|--------------|--------------|----------------|
| 1               | ArticularyWordRecognition | 67.27    | 57.39        | 60.93        | 9.20     | 68.67        | 61.73        | 57.10        | <b>75.40</b>   |
| 2               | AtrialFibrillation        | 28.00    | 29.33        | 30.00        | 33.33    | 32.00        | 28.00        | <b>34.67</b> | 32.00          |
| 3               | BasicMotions              | 77.00    | 73.00        | <b>81.75</b> | 39.00    | 80.90        | 77.50        | 74.75        | 78.50          |
| 4               | CharacterTrajectories     | 82.52    | 69.46        | 66.33        | 5.22     | 85.38        | 81.92        | 83.48        | <b>87.47</b>   |
| 5               | Cricket                   | 80.28    | 78.28        | 79.31        | 26.11    | 92.50        | 81.11        | 76.81        | <b>92.78</b>   |
| 6               | DuckDuckGeese             | 38.80    | 41.60        | 36.40        | 20.00    | 39.20        | 39.60        | <b>42.00</b> | 37.20          |
| 7               | EigenWorms                | 33.44    | 54.63        | <b>60.38</b> | 32.67    | 43.66        | 43.21        | 60.31        | 54.81          |
| 8               | Epilepsy                  | 65.80    | 64.55        | 72.03        | 67.10    | 73.04        | 71.74        | 78.64        | <b>79.36</b>   |
| 9               | EthanolConcentration      | 24.82    | 26.40        | 27.75        | 24.71    | 25.17        | 26.69        | 26.81        | <b>28.37</b>   |
| 10              | ERing                     | 53.69    | 52.48        | 48.48        | 36.79    | 49.82        | <b>56.44</b> | 44.59        | 54.15          |
| 11              | FaceDetection             | 50.05    | 50.04        | 50.80        | 50.57    | 49.81        | 50.22        | 50.93        | <b>51.00</b>   |
| 12              | FingerMovements           | 51.40    | <b>51.60</b> | 51.10        | 51.20    | 49.60        | 51.40        | 48.60        | 49.60          |
| 13              | HandMovementDirection     | 25.31    | 30.11        | 26.49        | 19.73    | 19.73        | 28.92        | 25.95        | <b>31.62</b>   |
| 14              | Handwriting               | 21.35    | 22.54        | 22.92        | 17.93    | 6.17         | 21.51        | <b>23.19</b> | 23.01          |
| 15              | Heartbeat                 | 56.39    | 58.01        | <b>66.63</b> | 57.69    | 58.50        | 56.20        | 59.02        | 51.00          |
| 16              | InsectWingbeat            | 47.94    | 39.18        | 57.07        | 55.93    | 36.95        | 57.12        | <b>59.40</b> | 58.32          |
| 17              | JapaneseVowels            | 68.05    | 66.46        | 65.36        | 27.89    | 77.03        | 73.35        | 78.97        | <b>81.54</b>   |
| 18              | Libras                    | 46.04    | <b>51.56</b> | 47.00        | 9.33     | 48.67        | 49.44        | 41.11        | 50.18          |
| 19              | LSST                      | 48.16    | 47.72        | 46.43        | 49.04    | 33.58        | 48.78        | 49.11        | <b>50.47</b>   |
| 20              | MotorImagery              | 49.20    | 51.00        | 49.90        | 50.00    | 51.00        | <b>52.00</b> | 51.90        | 47.80          |
| 21              | NATOPS                    | 57.78    | 56.80        | 58.78        | 26.67    | <b>67.24</b> | 57.67        | 58.34        | 59.98          |
| 22              | PenDigits                 | 81.99    | 70.68        | 93.43        | 91.81    | 92.59        | 91.18        | 93.29        | <b>96.69</b>   |
| 23              | PEMS-SF                   | 42.89    | 43.86        | 35.14        | 16.42    | <b>47.86</b> | 43.82        | 41.49        | 44.35          |
| 24              | PhonemeSpectra            | 16.50    | 15.82        | 17.37        | 8.40     | 3.22         | 17.15        | <b>17.48</b> | 17.42          |
| 25              | RacketSports              | 59.08    | 59.55        | <b>64.68</b> | 27.50    | 60.11        | 58.55        | 58.62        | 59.89          |
| 26              | SelfRegulationSCP1        | 60.63    | 60.38        | 56.02        | 48.12    | 49.90        | 65.80        | <b>66.00</b> | 54.54          |
| 27              | SelfRegulationSCP2        | 51.69    | 50.87        | 50.63        | 51.11    | 50.00        | 51.89        | 50.22        | <b>52.11</b>   |
| 28              | SpokenArabicDigits        | 74.85    | 67.24        | 89.70        | 83.37    | <b>98.76</b> | 86.68        | 87.87        | 97.53          |
| 29              | StandWalkJump             | 40.00    | <b>42.67</b> | 39.33        | 32.00    | <b>42.67</b> | 38.67        | 42.00        | 40.00          |
| 30              | UWaveGestureLibrary       | 67.19    | 67.90        | 60.56        | 12.50    | 67.74        | 67.69        | 55.69        | <b>69.96</b>   |
| <b>Avg Acc</b>  |                           | 52.27    | 51.70        | 53.76        | 36.04    | 53.38        | 54.53        | 54.61        | <b>56.90</b>   |
| <b>Avg Rank</b> |                           | 5.20     | 4.77         | 4.33         | 6.60     | 4.27         | 4.20         | 3.77         | <b>2.60</b>    |
| <b>P-value</b>  |                           | 6.08E-04 | 2.92E-03     | 1.20E-02     | 2.55E-05 | 5.52E-03     | 1.08E-02     | 3.47E-02     | -              |

Table 15: Multi-scale analysis of Scale-teaching using UCR 128 archive with Sym 20% noisy labels.

| ID  | Dataset                        | fine   | medium | coarse | a_t_b_f | a_f_b_t | a_t_b_t | b_t_c_f | b_f_c_t | b_t_c_t | c_t_a_f | c_f_a_t | c_t_a_t |
|-----|--------------------------------|--------|--------|--------|---------|---------|---------|---------|---------|---------|---------|---------|---------|
| 1   | ACSF1                          | 0.6080 | 0.6640 | 0.6620 | 8       | 14      | 52      | 4       | 4       | 63      | 16      | 11      | 50      |
| 2   | Adiac                          | 0.0281 | 0.4890 | 0.5243 | 11      | 191     | 0       | 18      | 32      | 173     | 205     | 11      | 0       |
| 3   | AllGestureWimoteX              | 0.4089 | 0.5526 | 0.5666 | 34      | 135     | 252     | 22      | 31      | 365     | 149     | 39      | 247     |
| 4   | AllGestureWimoteY              | 0.4526 | 0.6643 | 0.6494 | 47      | 196     | 269     | 27      | 17      | 438     | 188     | 50      | 266     |
| 5   | AllGestureWimoteZ              | 0.4863 | 0.6449 | 0.6431 | 39      | 150     | 301     | 31      | 30      | 420     | 164     | 55      | 286     |
| 6   | ArrowHead                      | 0.4194 | 0.5886 | 0.6171 | 11      | 41      | 62      | 2       | 7       | 101     | 46      | 11      | 62      |
| 7   | BME                            | 0.5347 | 0.7333 | 0.7933 | 6       | 36      | 74      | 0       | 9       | 110     | 45      | 6       | 74      |
| 8   | Beef                           | 0.2667 | 0.4000 | 0.3800 | 0       | 4       | 8       | 1       | 0       | 11      | 3       | 0       | 8       |
| 9   | BeetleFly                      | 0.6000 | 0.8500 | 0.8500 | 0       | 5       | 12      | 0       | 0       | 17      | 5       | 0       | 12      |
| 10  | BirdChicken                    | 0.9600 | 0.8500 | 0.9500 | 3       | 1       | 16      | 3       | 2       | 16      | 1       | 1       | 18      |
| 11  | CBF                            | 0.7611 | 0.8311 | 0.8724 | 23      | 86      | 662     | 2       | 40      | 746     | 109     | 8       | 677     |
| 12  | Car                            | 0.4033 | 0.6633 | 0.6733 | 3       | 18      | 22      | 1       | 2       | 39      | 19      | 3       | 22      |
| 13  | Chinatown                      | 0.7304 | 0.7391 | 0.7391 | 5       | 8       | 247     | 8       | 8       | 247     | 3       | 0       | 252     |
| 14  | ChlorineConcentration          | 0.5724 | 0.6120 | 0.6117 | 265     | 417     | 1933    | 92      | 91      | 2258    | 484     | 333     | 1865    |
| 15  | CinCECGTorso                   | 0.5097 | 0.5007 | 0.5506 | 148     | 136     | 555     | 34      | 102     | 657     | 145     | 89      | 614     |
| 16  | Coffee                         | 1.0000 | 1.0000 | 1.0000 | 0       | 0       | 28      | 0       | 0       | 28      | 0       | 0       | 28      |
| 17  | Computers                      | 0.6824 | 0.7280 | 0.7200 | 2       | 14      | 168     | 4       | 2       | 178     | 12      | 3       | 168     |
| 18  | CricketX                       | 0.3923 | 0.6733 | 0.6867 | 16      | 126     | 137     | 9       | 14      | 254     | 132     | 18      | 135     |
| 19  | CricketY                       | 0.4549 | 0.5990 | 0.5923 | 25      | 81      | 152     | 16      | 13      | 218     | 85      | 31      | 146     |
| 20  | CricketZ                       | 0.4764 | 0.6949 | 0.6995 | 23      | 108     | 163     | 11      | 12      | 260     | 118     | 31      | 155     |
| 21  | Crop                           | 0.7035 | 0.7443 | 0.7444 | 545     | 1231    | 11273   | 215     | 217     | 12289   | 604     | 1124    | 604     |
| 22  | DiatomSizeReduction            | 0.8105 | 0.8333 | 0.8268 | 0       | 7       | 248     | 2       | 0       | 253     | 5       | 0       | 248     |
| 23  | DistalPhalanxOutlineAgeGroup   | 0.6619 | 0.6647 | 0.6662 | 13      | 14      | 79      | 5       | 5       | 88      | 18      | 17      | 75      |
| 24  | DistalPhalanxOutlineCorrect    | 0.7949 | 0.7986 | 0.7913 | 12      | 13      | 208     | 3       | 1       | 217     | 14      | 15      | 205     |
| 25  | DistalPhalanxTW                | 0.6806 | 0.6806 | 0.6259 | 8       | 8       | 87      | 11      | 3       | 84      | 9       | 16      | 78      |
| 26  | DodgerLoopDay                  | 0.3500 | 0.3750 | 0.3625 | 12      | 14      | 16      | 3       | 2       | 27      | 14      | 13      | 15      |
| 27  | DodgerLoopGame                 | 0.5942 | 0.5087 | 0.5000 | 20      | 8       | 62      | 19      | 18      | 51      | 22      | 35      | 487     |
| 28  | DodgerLoopWeekend              | 0.8826 | 0.8957 | 0.8696 | 1       | 3       | 120     | 5       | 1       | 119     | 0       | 2       | 120     |
| 29  | ECG200                         | 0.7500 | 0.7600 | 0.7700 | 1       | 2       | 74      | 0       | 1       | 76      | 2       | 0       | 75      |
| 30  | ECG5000                        | 0.9313 | 0.9415 | 0.9411 | 50      | 96      | 4141    | 15      | 13      | 4221    | 103     | 59      | 4132    |
| 31  | ECGFiveDays                    | 0.6039 | 0.6139 | 0.6049 | 14      | 23      | 506     | 15      | 7       | 513     | 11      | 10      | 510     |
| 32  | EOCHorizonSignal               | 0.3994 | 0.4608 | 0.5249 | 28      | 50      | 117     | 8       | 32      | 158     | 76      | 30      | 114     |
| 33  | EOGVerticalSignal              | 0.2790 | 0.3315 | 0.3718 | 13      | 32      | 88      | 5       | 20      | 115     | 44      | 10      | 91      |
| 34  | Earthquakes                    | 0.7482 | 0.7468 | 0.7482 | 3       | 3       | 101     | 4       | 5       | 99      | 7       | 7       | 97      |
| 35  | ElectricDevices                | 0.6540 | 0.6774 | 0.7035 | 289     | 470     | 4754    | 136     | 337     | 5087    | 718     | 336     | 4707    |
| 36  | EthanolLevel                   | 0.2520 | 0.5628 | 0.5712 | 46      | 202     | 80      | 15      | 19      | 267     | 208     | 48      | 78      |
| 37  | FaceAll                        | 0.6820 | 0.7229 | 0.7557 | 92      | 246     | 1060    | 40      | 11      | 1266    | 225     | 101     | 1052    |
| 38  | FaceFour                       | 0.3182 | 0.5023 | 0.5159 | 5       | 21      | 23      | 2       | 3       | 42      | 19      | 2       | 26      |
| 39  | FacesUCR                       | 0.5544 | 0.8270 | 0.8037 | 36      | 594     | 1101    | 111     | 63      | 1584    | 575     | 64      | 1073    |
| 40  | FiftyWords                     | 0.2725 | 0.4295 | 0.5095 | 2       | 73      | 122     | 21      | 58      | 174     | 112     | 4       | 120     |
| 41  | Fish                           | 0.4114 | 0.7074 | 0.7211 | 2       | 53      | 70      | 7       | 9       | 117     | 58      | 4       | 68      |
| 42  | FordA                          | 0.9124 | 0.9189 | 0.9235 | 25      | 34      | 1179    | 4       | 10      | 1209    | 42      | 27      | 1177    |
| 43  | FordB                          | 0.7719 | 0.7968 | 0.8000 | 37      | 8       | 79      | 8       | 11      | 63      | 65      | 4       | 583     |
| 44  | FreezerRegularTrain            | 0.9062 | 0.8516 | 0.8407 | 220     | 65      | 2363    | 43      | 12      | 2384    | 72      | 258     | 2324    |
| 45  | FreezerSmallTrain              | 0.6724 | 0.7077 | 0.5981 | 87      | 188     | 1829    | 434     | 122     | 1583    | 72      | 283     | 1633    |
| 46  | Fungi                          | 0.0591 | 0.3430 | 0.2634 | 0       | 53      | 11      | 24      | 9       | 40      | 38      | 0       | 11      |
| 47  | GestureMidAirD1                | 0.2492 | 0.4108 | 0.4323 | 5       | 26      | 27      | 6       | 9       | 47      | 31      | 7       | 25      |
| 48  | GestureMidAirD2                | 0.2154 | 0.3215 | 0.3462 | 7       | 21      | 21      | 2       | 8       | 37      | 24      | 2       | 21      |
| 49  | GestureMidAirD3                | 0.1308 | 0.1631 | 0.2385 | 1       | 5       | 16      | 2       | 12      | 19      | 16      | 2       | 15      |
| 50  | GesturePebbleZ1                | 0.8233 | 0.7116 | 0.7256 | 25      | 6       | 117     | 3       | 6       | 119     | 8       | 24      | 117     |
| 51  | GesturePebbleZ2                | 0.8025 | 0.8228 | 0.8127 | 8       | 11      | 119     | 4       | 2       | 126     | 13      | 11      | 116     |
| 52  | GunPoint                       | 0.8293 | 0.7840 | 0.7600 | 25      | 19      | 99      | 5       | 1       | 113     | 20      | 30      | 94      |
| 53  | GunPointAgeSpan                | 0.4937 | 0.5127 | 0.5823 | 1       | 7       | 155     | 3       | 25      | 159     | 32      | 4       | 152     |
| 54  | GunPointMaleVersusFemale       | 0.9908 | 0.9671 | 0.9620 | 9       | 2       | 306     | 2       | 0       | 304     | 0       | 0       | 304     |
| 55  | GunPointOldVersusYoung         | 1.0000 | 1.0000 | 1.0000 | 0       | 0       | 315     | 0       | 0       | 315     | 0       | 0       | 315     |
| 56  | Ham                            | 0.5905 | 0.6286 | 0.6381 | 3       | 7       | 59      | 3       | 4       | 63      | 9       | 4       | 58      |
| 57  | HandOutlines                   | 0.6405 | 0.7870 | 0.8205 | 34      | 88      | 203     | 7       | 20      | 284     | 99      | 33      | 204     |
| 58  | Haptics                        | 0.2851 | 0.3890 | 0.3870 | 35      | 67      | 53      | 11      | 10      | 109     | 72      | 41      | 47      |
| 59  | Herring                        | 0.5938 | 0.6719 | 0.6656 | 7       | 12      | 31      | 8       | 2       | 41      | 13      | 8       | 30      |
| 60  | HouseTwenty                    | 0.6202 | 0.6773 | 0.6739 | 1       | 8       | 73      | 2       | 2       | 78      | 7       | 0       | 73      |
| 61  | InlineSkate                    | 0.1585 | 0.2691 | 0.2949 | 30      | 91      | 57      | 20      | 34      | 128     | 119     | 44      | 43      |
| 62  | InsectEPGRegularTrain          | 1.0000 | 1.0000 | 1.0000 | 0       | 0       | 249     | 0       | 0       | 249     | 0       | 0       | 249     |
| 63  | InsectEPGSmallTrain            | 1.0000 | 1.0000 | 1.0000 | 0       | 0       | 249     | 0       | 0       | 249     | 0       | 0       | 249     |
| 64  | InsectWingbeatSound            | 0.2799 | 0.4133 | 0.4266 | 131     | 395     | 423     | 109     | 135     | 710     | 467     | 176     | 378     |
| 65  | ItalyPowerDemand               | 0.8871 | 0.8892 | 0.8908 | 4       | 5       | 909     | 2       | 4       | 918     | 8       | 4       | 909     |
| 66  | LargeKitchenAppliances         | 0.8747 | 0.8645 | 0.8667 | 13      | 9       | 315     | 6       | 7       | 318     | 10      | 13      | 315     |
| 67  | Lightning2                     | 0.6393 | 0.6066 | 0.6230 | 3       | 1       | 36      | 1       | 2       | 36      | 0       | 1       | 38      |
| 68  | Lightning7                     | 0.3562 | 0.5068 | 0.5397 | 6       | 17      | 20      | 2       | 4       | 35      | 20      | 7       | 19      |
| 69  | Mallat                         | 0.2473 | 0.7108 | 0.7317 | 3       | 1090    | 577     | 109     | 158     | 1558    | 1204    | 69      | 511     |
| 70  | Meat                           | 0.3333 | 0.7100 | 0.8233 | 1       | 24      | 19      | 2       | 8       | 41      | 31      | 2       | 21      |
| 71  | MedicalImages                  | 0.5797 | 0.7153 | 0.7045 | 56      | 159     | 384     | 33      | 25      | 511     | 172     | 77      | 364     |
| 72  | MelbournePedestrian            | 0.8996 | 0.9343 | 0.9518 | 11      | 96      | 2193    | 11      | 53      | 2278    | 146     | 18      | 2186    |
| 73  | MiddlePhalanxOutlineAgeGroup   | 0.6104 | 0.5260 | 0.4961 | 26      | 13      | 68      | 10      | 5       | 71      | 16      | 34      | 60      |
| 74  | MiddlePhalanxOutlineCorrect    | 0.5704 | 0.6227 | 0.6701 | 8       | 23      | 158     | 16      | 30      | 165     | 53      | 24      | 142     |
| 75  | MiddlePhalanxTW                | 0.5195 | 0.5351 | 0.5091 | 12      | 14      | 68      | 8       | 4       | 75      | 17      | 19      | 61      |
| 76  | MixedShapesRegularTrain        | 0.9326 | 0.9485 | 0.9425 | 47      | 85      | 2215    | 17      | 3       | 2383    | 81      | 57      | 2205    |
| 77  | MixedShapesSmallTrain          | 0.4317 | 0.7070 | 0.7095 | 151     | 819     | 896     | 106     | 112     | 1609    | 874     | 200     | 847     |
| 78  | MoteStrain                     | 0.5391 | 0.6193 | 0.5391 | 102     | 202     | 573     | 202     | 102     | 573     | 0       | 0       | 675     |
| 79  | NonInvasiveFetalECGThorax1     | 0.0249 | 0.7906 | 0.8754 | 1       | 1506    | 48      | 44      | 211     | 1509    | 1680    | 9       | 40      |
| 80  | NonInvasiveFetalECGThorax2     | 0.0249 | 0.7719 | 0.8101 | 1       | 1469    | 48      | 140     | 215     | 1377    | 1544    | 1       | 48      |
| 81  | OSLLeaf                        | 0.8537 | 0.8132 | 0.8289 | 12      | 6       | 190     | 2       | 6       | 195     | 8       | 10      | 192     |
| 82  | OliveOil                       | 0.4000 | 0.6000 | 0.6667 | 1       | 7       | 11      | 1       | 3       | 17      | 9       | 1       | 11      |
| 83  | PLAID                          | 0.3289 | 0.2205 | 0.2272 | 61      | 3       | 116     | 5       | 9       | 113     | 7       | 62      | 115     |
| 84  | PhalangesOutlinesCorrect       | 0.6720 | 0.6911 | 0.7193 | 27      | 43      | 550     | 14      | 38      | 579     | 80      | 39      | 537     |
| 85  | Phoneme                        | 0.2346 | 0.2684 | 0.2545 | 114     | 178     | 330     | 86      | 60      | 423     | 179     | 141     | 304     |
| 86  | PickupGestureWimoteZ           | 0.0480 | 0.6600 | 0.6600 | 3       | 19      | 14      | 7       | 7       | 26      | 23      | 7       | 10      |
| 87  | PigAirwayPressure              | 0.0654 | 0.1933 | 0.1452 | 4       | 31      | 10      | 2       | 4       | 23      | 23      | 7       | 7       |
| 88  | PigArtPressure                 | 0.0673 | 0.2663 | 0.2923 | 5       | 47      | 9       | 12      | 17      | 44      | 50      | 3       | 11      |
| 89  | PigCVP                         | 0.0721 | 0.1885 | 0.1538 | 8       | 32      | 7       | 15      | 8       | 24      | 22      | 5       | 10      |
| 90  | Plane                          | 1.0000 | 1.0000 | 1.0000 | 0       | 0       | 105     | 0       | 0       | 105     | 0       | 0       | 105     |
| 91  | PowerCons                      | 0.8422 | 0.8367 | 0.8322 | 5       | 4       | 147     | 3       | 2       | 148     | 5       | 6       | 145     |
| 92  | ProximalPhalanxOutlineAgeGroup | 0.8537 | 0.8224 | 0.7863 | 10      | 4       | 165     | 7       | 0       | 161     | 3       | 17      | 158     |
| 93  | ProximalPhalanxOutlineCorrect  | 0.7216 | 0.8082 | 0.8048 | 8       | 33      | 202     | 5       | 4       | 230     | 37      | 13      | 198     |
| 94  | ProximalPhalanxTW              | 0.8098 | 0.7951 | 0.7951 | 5       | 2       | 161     | 0       | 0       | 163     | 2       | 5       | 161     |
| 95  | RefrigerationDevices           | 0.5061 | 0.5429 | 0.5248 | 9       | 23      | 181     | 15      | 8       | 188     | 26      | 19      | 171     |
| 96  | Rock                           | 0.4400 | 0.3880 | 0.3400 | 4       | 1       | 18      | 3       | 1       | 16      | 0       | 5       | 17      |
| 97  | ScreenType                     | 0.6325 | 0.5888 | 0.5744 | 41      | 24      | 197     | 17      | 11      | 204     | 25      | 47      | 190     |
| 98  | SemgHandGenderCh2              | 0.6970 | 0.7277 | 0.7410 | 25      | 43      | 394     | 7       | 15      | 429     | 52      | 26      | 392     |
| 99  | SemgHandMovementCh2            | 0.4622 | 0.5933 | 0.5747 | 28      | 87      | 180     | 24      | 16      | 243     | 87      | 37      | 171     |
| 100 | SemgHandSubjectCh2             | 0.5556 | 0.6929 | 0.7102 | 29      | 91      | 221     | 18      | 25      | 294     | 112     | 42      | 208     |
| 101 | ShakeGestureWimoteZ            | 0.3400 | 0.6400 | 0.6320 | 1       | 16      | 16      | 2       | 2       | 30      | 17      | 2       | 15      |
| 102 | ShapeletSim                    | 0.9367 | 0.8833 | 0.8000 | 12      | 2       | 157     | 25      | 10      | 134     | 7       | 32      | 137     |
| 103 | ShapesAll                      | 0.1863 | 0.7257 | 0.7477 | 7       | 331     | 105     | 26      | 39      | 409     | 343     | 6       | 106     |
| 104 | SmallKitchenAppliances         | 0.8091 | 0.8000 | 0.8000 | 22      | 19      | 281     |         |         |         |         |         |         |



Table 16: Multi-scale analysis of w/o cross-scale fusion based on Scale-teaching using UCR 128 archive with Sym 20% noisy labels.

| ID  | Dataset                        | fine   | medium | coarse | a_t_b_f | a_f_b_t | a_t_b_t | b_t_c_f | b_f_c_t | b_t_c_t | c_t_a_f | c_f_a_t | c_t_a_t |
|-----|--------------------------------|--------|--------|--------|---------|---------|---------|---------|---------|---------|---------|---------|---------|
| 1   | ACSF1                          | 0.5500 | 0.0100 | 0.2500 | 54      | 0       | 1       | 1       | 25      | 0       | 7       | 37      | 18      |
| 2   | Adiac                          | 0.1074 | 0.0327 | 0.0077 | 34      | 5       | 8       | 13      | 3       | 0       | 1       | 40      | 2       |
| 3   | AllGestureWimoteX              | 0.4697 | 0.1337 | 0.0980 | 280     | 45      | 49      | 18      | 51      | 32      | 293     | 26      | 0       |
| 4   | AllGestureWimoteY              | 0.5503 | 0.0543 | 0.0994 | 360     | 13      | 25      | 38      | 70      | 0       | 68      | 321     | 65      |
| 5   | AllGestureWimoteZ              | 0.5723 | 0.1109 | 0.0977 | 348     | 25      | 53      | 77      | 68      | 1       | 68      | 400     | 0       |
| 6   | ArrowHead                      | 0.6366 | 0.3029 | 0.4114 | 93      | 34      | 19      | 34      | 53      | 19      | 8       | 48      | 64      |
| 7   | BME                            | 0.4747 | 0.3467 | 0.5653 | 21      | 2       | 50      | 8       | 41      | 44      | 41      | 27      | 44      |
| 8   | Beef                           | 0.3667 | 0.2000 | 0.2000 | 10      | 5       | 1       | 6       | 6       | 0       | 3       | 8       | 3       |
| 9   | BeechFly                       | 0.8000 | 0.5000 | 0.5000 | 10      | 4       | 6       | 0       | 0       | 10      | 4       | 10      | 6       |
| 10  | BirdChicken                    | 0.8500 | 0.5000 | 0.5000 | 9       | 2       | 8       | 0       | 0       | 10      | 2       | 9       | 8       |
| 11  | CBF                            | 0.8978 | 0.3311 | 0.4153 | 510     | 0       | 298     | 0       | 76      | 298     | 21      | 455     | 353     |
| 12  | Car                            | 0.6667 | 0.0833 | 0.2167 | 35      | 0       | 5       | 5       | 13      | 0       | 1       | 28      | 12      |
| 13  | Chinatown                      | 0.7438 | 0.7391 | 0.7246 | 8       | 6       | 249     | 5       | 0       | 250     | 4       | 11      | 246     |
| 14  | ChlorineConcentration          | 0.5973 | 0.2367 | 0.5326 | 2091    | 707     | 202     | 999     | 2045    | 0       | 377     | 625     | 1668    |
| 15  | CinCECGTorso                   | 0.4768 | 0.0845 | 0.1759 | 588     | 46      | 70      | 115     | 241     | 2       | 38      | 453     | 205     |
| 16  | Coffee                         | 1.0000 | 0.4643 | 0.4643 | 15      | 0       | 13      | 0       | 0       | 13      | 0       | 15      | 13      |
| 17  | Computers                      | 0.6960 | 0.5984 | 0.5000 | 54      | 30      | 120     | 43      | 18      | 107     | 46      | 95      | 79      |
| 18  | CricketX                       | 0.4769 | 0.1723 | 0.0949 | 125     | 6       | 61      | 67      | 37      | 0       | 33      | 182     | 4       |
| 19  | CricketY                       | 0.4785 | 0.0846 | 0.1149 | 155     | 1       | 32      | 33      | 45      | 0       | 22      | 163     | 23      |
| 20  | CricketZ                       | 0.4769 | 0.1564 | 0.1671 | 142     | 17      | 44      | 45      | 48      | 16      | 8       | 131     | 55      |
| 21  | Crop                           | 0.6986 | 0.1058 | 0.0225 | 10215   | 256     | 1522    | 1767    | 368     | 11      | 193     | 11551   | 186     |
| 22  | DiatomSizeReduction            | 0.7320 | 0.2915 | 0.2039 | 194     | 59      | 30      | 81      | 54      | 8       | 17      | 179     | 45      |
| 23  | DistalPhalanxOutlineAgeGroup   | 0.7626 | 0.5122 | 0.4604 | 46      | 11      | 60      | 58      | 51      | 13      | 18      | 60      | 46      |
| 24  | DistalPhalanxOutlineCorrect    | 0.7826 | 0.5971 | 0.5833 | 68      | 17      | 148     | 8       | 4       | 157     | 21      | 76      | 140     |
| 25  | DistalPhalanxTW                | 0.3465 | 0.2806 | 0.2806 | 63      | 4       | 35      | 0       | 0       | 39      | 4       | 63      | 35      |
| 26  | DodgerLoopDay                  | 0.2450 | 0.1125 | 0.2000 | 19      | 8       | 1       | 8       | 15      | 1       | 16      | 20      | 0       |
| 27  | DodgerLoopGame                 | 0.7261 | 0.4783 | 0.4783 | 51      | 16      | 50      | 0       | 0       | 66      | 16      | 51      | 50      |
| 28  | DodgerLoopWeekend              | 0.9029 | 0.2609 | 0.2609 | 99      | 10      | 26      | 0       | 0       | 36      | 10      | 99      | 26      |
| 29  | ECG200                         | 0.6940 | 0.6440 | 0.6400 | 6       | 1       | 63      | 0       | 0       | 64      | 1       | 6       | 63      |
| 30  | ECG5000                        | 0.9396 | 0.2929 | 0.0191 | 2940    | 30      | 1288    | 1514    | 82      | 4       | 63      | 4205    | 23      |
| 31  | ECGFiveDays                    | 0.6156 | 0.5029 | 0.5029 | 375     | 278     | 155     | 0       | 0       | 433     | 278     | 375     | 155     |
| 32  | EOGHorizontalSignal            | 0.4779 | 0.1492 | 0.0304 | 134     | 15      | 39      | 53      | 10      | 1       | 8       | 170     | 3       |
| 33  | EOGVerticalSignal              | 0.3265 | 0.0657 | 0.0801 | 100     | 6       | 18      | 11      | 16      | 13      | 15      | 104     | 14      |
| 34  | Earthquakes                    | 0.7511 | 0.2518 | 0.2518 | 104     | 35      | 0       | 0       | 0       | 35      | 35      | 104     | 0       |
| 35  | ElectricDevices                | 0.7407 | 0.0929 | 0.0929 | 5458    | 463     | 254     | 642     | 641     | 75      | 187     | 5182    | 530     |
| 36  | EthanolLevel                   | 0.4480 | 0.2392 | 0.2408 | 121     | 17      | 103     | 118     | 2       | 120     | 2       | 223     | 1       |
| 37  | FaceAll                        | 0.9155 | 0.0643 | 0.0095 | 1447    | 8       | 100     | 109     | 16      | 0       | 5       | 1536    | 11      |
| 38  | FaceFour                       | 0.4545 | 0.0455 | 0.1591 | 40      | 4       | 0       | 3       | 13      | 1       | 5       | 31      | 9       |
| 39  | FacesUCR                       | 0.8332 | 0.1257 | 0.0474 | 1456    | 6       | 252     | 258     | 97      | 0       | 10      | 1621    | 87      |
| 40  | FiftyWords                     | 0.3143 | 0.0088 | 0.0400 | 142     | 3       | 1       | 4       | 18      | 0       | 4       | 128     | 15      |
| 41  | Fish                           | 0.6629 | 0.0457 | 0.2571 | 111     | 3       | 5       | 7       | 44      | 1       | 2       | 73      | 43      |
| 42  | Foeda                          | 0.9098 | 0.6244 | 0.4841 | 425     | 48      | 776     | 200     | 15      | 624     | 60      | 622     | 79      |
| 43  | FordB                          | 0.7788 | 0.5521 | 0.5049 | 275     | 91      | 356     | 47      | 9       | 400     | 100     | 322     | 309     |
| 44  | FreezerRegularTrain            | 0.9882 | 0.5004 | 0.5000 | 1409    | 19      | 1407    | 1       | 0       | 1425    | 19      | 1410    | 1406    |
| 45  | FreezerSmallTrain              | 0.6216 | 0.4220 | 0.5000 | 1167    | 598     | 605     | 164     | 387     | 1038    | 705     | 1052    | 720     |
| 46  | Fungi                          | 0.1882 | 0.0710 | 0.0806 | 35      | 13      | 0       | 13      | 5       | 0       | 15      | 35      | 0       |
| 47  | GestureMidAirD1                | 0.3662 | 0.0308 | 0.0385 | 31      | 1       | 3       | 4       | 0       | 0       | 3       | 32      | 2       |
| 48  | GestureMidAirD2                | 0.2385 | 0.0231 | 0.0185 | 28      | 0       | 3       | 3       | 2       | 0       | 0       | 29      | 2       |
| 49  | GestureMidAirD3                | 0.1538 | 0.0308 | 0.0323 | 19      | 3       | 1       | 3       | 3       | 1       | 2       | 18      | 2       |
| 50  | GesturePebbleZ1                | 0.7395 | 0.1919 | 0.3198 | 114     | 20      | 13      | 1       | 23      | 32      | 21      | 93      | 34      |
| 51  | GesturePebbleZ2                | 0.8139 | 0.1329 | 0.2595 | 109     | 1       | 20      | 18      | 38      | 3       | 19      | 106     | 22      |
| 52  | GunPoint                       | 1.0000 | 0.9533 | 0.4933 | 7       | 0       | 143     | 69      | 0       | 74      | 0       | 76      | 74      |
| 53  | GunPointVersusSpan             | 0.6156 | 0.5544 | 0.4937 | 67      | 5       | 170     | 84      | 65      | 91      | 70      | 155     | 10      |
| 54  | GunPointMaleVersusFemale       | 0.9968 | 0.4399 | 0.4747 | 176     | 0       | 139     | 4       | 15      | 135     | 0       | 165     | 150     |
| 55  | GunPointOldVersusYoung         | 1.0000 | 0.9873 | 0.5238 | 4       | 0       | 311     | 146     | 0       | 165     | 0       | 150     | 165     |
| 56  | Ham                            | 0.6381 | 0.5143 | 0.5143 | 35      | 22      | 32      | 0       | 0       | 54      | 22      | 35      | 32      |
| 57  | HandOutlines                   | 0.7741 | 0.6405 | 0.6405 | 81      | 31      | 206     | 0       | 0       | 237     | 31      | 81      | 206     |
| 58  | Haptics                        | 0.3662 | 0.1883 | 0.2370 | 77      | 22      | 36      | 58      | 73      | 0       | 27      | 67      | 46      |
| 59  | Herring                        | 0.7188 | 0.4062 | 0.4062 | 31      | 11      | 15      | 0       | 0       | 26      | 11      | 31      | 15      |
| 60  | HouseTwenty                    | 0.9328 | 0.4202 | 0.4202 | 62      | 1       | 49      | 0       | 0       | 50      | 1       | 62      | 49      |
| 61  | InlineSkate                    | 0.1880 | 0.1509 | 0.1793 | 99      | 79      | 4       | 23      | 39      | 60      | 85      | 90      | 14      |
| 62  | InsectEPGRegularTrain          | 0.8313 | 0.6426 | 0.0008 | 89      | 42      | 118     | 160     | 0       | 0       | 0       | 207     | 0       |
| 63  | InsectEPGSmallTrain            | 1.0000 | 0.4739 | 0.0161 | 131     | 0       | 118     | 114     | 0       | 4       | 0       | 245     | 4       |
| 64  | InsectWingsSound               | 0.3357 | 0.1212 | 0.0943 | 519     | 109     | 146     | 240     | 173     | 14      | 70      | 548     | 116     |
| 65  | ItalyPowerDemand               | 0.9499 | 0.5015 | 0.5015 | 481     | 20      | 496     | 0       | 0       | 516     | 20      | 481     | 496     |
| 66  | LargeKitchenAppliances         | 0.8240 | 0.3333 | 0.2880 | 205     | 21      | 104     | 125     | 108     | 0       | 22      | 223     | 86      |
| 67  | Lightning2                     | 0.6066 | 0.6393 | 0.5410 | 0       | 2       | 37      | 9       | 3       | 30      | 5       | 9       | 28      |
| 68  | Lightning7                     | 0.4110 | 0.3178 | 0.0849 | 11      | 4       | 19      | 23      | 6       | 0       | 6       | 30      | 0       |
| 69  | Mallat                         | 0.5092 | 0.2370 | 0.1454 | 674     | 36      | 520     | 509     | 294     | 47      | 0       | 853     | 341     |
| 70  | Meat                           | 0.6633 | 0.3333 | 0.1500 | 22      | 2       | 18      | 15      | 4       | 5       | 0       | 31      | 9       |
| 71  | MedicalImages                  | 0.6405 | 0.4261 | 0.1800 | 206     | 43      | 281     | 261     | 74      | 62      | 51      | 401     | 85      |
| 72  | MelbournePedestrian            | 0.9030 | 0.0079 | 0.1012 | 2198    | 5       | 14      | 17      | 246     | 2       | 7       | 1972    | 241     |
| 73  | MiddlePhalanxOutlineAgeGroup   | 0.5870 | 0.5714 | 0.1883 | 21      | 19      | 69      | 88      | 29      | 0       | 20      | 81      | 9       |
| 74  | MiddlePhalanxOutlineCorrect    | 0.7993 | 0.6852 | 0.5704 | 51      | 18      | 182     | 40      | 7       | 159     | 23      | 90      | 143     |
| 75  | MiddlePhalanxTW                | 0.5506 | 0.2506 | 0.1883 | 69      | 22      | 16      | 19      | 9       | 20      | 19      | 75      | 10      |
| 76  | MixedShapesRegularTrain        | 0.9509 | 0.0134 | 0.1340 | 2277    | 3       | 29      | 32      | 325     | 0       | 7       | 1988    | 318     |
| 77  | MixedShapesSmallTrain          | 0.6786 | 0.3753 | 0.1295 | 914     | 178     | 732     | 910     | 314     | 0       | 18      | 1350    | 296     |
| 78  | MoteStrain                     | 0.8997 | 0.4617 | 0.4609 | 632     | 84      | 494     | 9       | 8       | 569     | 92      | 641     | 485     |
| 79  | NonInvasiveFetalECGThorax1     | 0.2532 | 0.0193 | 0.0165 | 462     | 2       | 36      | 38      | 32      | 0       | 4       | 469     | 28      |
| 80  | NonInvasiveFetalECGThorax2     | 0.1859 | 0.0220 | 0.0025 | 324     | 2       | 41      | 43      | 5       | 0       | 5       | 365     | 0       |
| 81  | OSULeaf                        | 0.9628 | 0.1860 | 0.1322 | 188     | 0       | 45      | 45      | 32      | 0       | 1       | 202     | 31      |
| 82  | OliveOil                       | 0.4000 | 0.4000 | 0.4000 | 0       | 0       | 12      | 0       | 0       | 12      | 0       | 0       | 12      |
| 83  | PLAID                          | 0.3158 | 0.1713 | 0.1456 | 83      | 5       | 87      | 14      | 0       | 78      | 0       | 91      | 78      |
| 84  | PhalangesOutlinesCorrect       | 0.7683 | 0.7536 | 0.6131 | 38      | 25      | 622     | 150     | 29      | 497     | 32      | 165     | 494     |
| 85  | Phoneme                        | 0.2429 | 0.0216 | 0.0195 | 448     | 29      | 12      | 40      | 36      | 1       | 23      | 447     | 14      |
| 86  | PickupGestureWimoteZ           | 0.3760 | 0.1000 | 0.1000 | 14      | 0       | 5       | 2       | 0       | 0       | 4       | 14      | 5       |
| 87  | PigAirwayPressure              | 0.1058 | 0.0000 | 0.0385 | 22      | 0       | 0       | 2       | 8       | 0       | 4       | 18      | 4       |
| 88  | PigArtPressure                 | 0.1250 | 0.0058 | 0.0192 | 26      | 1       | 0       | 1       | 4       | 0       | 4       | 26      | 0       |
| 89  | PigCVP                         | 0.0577 | 0.0202 | 0.0192 | 12      | 4       | 0       | 4       | 0       | 4       | 0       | 12      | 0       |
| 90  | Plane                          | 1.0000 | 0.1238 | 0.2000 | 92      | 0       | 13      | 13      | 21      | 0       | 0       | 84      | 21      |
| 91  | PowerLines                     | 0.8389 | 0.5167 | 0.5009 | 67      | 9       | 84      | 3       | 0       | 90      | 9       | 70      | 81      |
| 92  | ProximalPhalanxOutlineAgeGroup | 0.8263 | 0.4293 | 0.1883 | 105     | 24      | 64      | 49      | 0       | 39      | 6       | 137     | 33      |
| 93  | ProximalPhalanxOutlineCorrect  | 0.8165 | 0.7113 | 0.6838 | 32      | 1       | 206     | 9       | 1       | 198     | 2       | 41      | 197     |
| 94  | ProximalPhalanxTW              | 0.8049 | 0.1951 | 0.1951 | 136     | 11      | 29      | 0       | 0       | 40      | 11      | 136     | 29      |
| 95  | RefrigerationDevices           | 0.5296 | 0.3413 | 0.3120 | 142     | 71      | 57      | 114     | 103     | 14      | 85      | 167     | 32      |
| 96  | Rock                           | 0.3600 | 0.1920 | 0.3000 | 12      | 4       | 6       | 8       | 13      | 2       | 9       | 12      | 6       |
| 97  | ScreenType                     | 0.6240 | 0.3333 | 0.3237 | 144     | 35      | 90      | 86      | 35      | 47      | 159     | 75      | 0       |
| 98  | SemgHandGenderCh2              | 0.7017 | 0.3777 | 0.3500 | 267     | 73      | 154     | 17      | 0       | 210     | 72      | 283     | 138     |
| 99  | SemgHandMovementCh2            | 0.4862 | 0.1169 | 0.2138 | 215     | 49      | 3       | 44      | 88      | 9       | 23      | 146     | 73      |
| 100 | SemgHandSubjectCh2             | 0.5711 | 0.2116 | 0.2000 | 184     | 23      | 73      | 88      | 83      | 7       | 42      | 209     | 48      |
| 101 | ShakeGestureWimoteZ            | 0.4800 | 0.0840 | 0.1000 | 21      | 1       | 3       | 4       | 5       | 0       | 0       | 19      | 5       |
| 102 | ShapletsSim                    | 0.9444 | 0.5000 | 0.5000 | 74      | 3       | 87      | 0       | 0       | 90      | 3       | 74      | 87      |
| 103 | ShapesAll                      | 0.3500 | 0.0263 | 0.0000 | 205     | 11      | 5       | 16      | 0       | 0       | 0       | 210     | 0       |
| 104 | SmallKitchenAppliances         | 0.7787 | 0.3621 | 0.2629 | 195     | 39      | 97      | 63      | 26      | 72      | 39      | 233     | 59      |
| 105 | SmoothSubspace                 | 0.9400 | 0.3333 |        |         |         |         |         |         |         |         |         |         |

Table 17: Multi-scale analysis of Scale-teaching using UCR 128 archive with Asym 50% noisy labels.

| ID  | Dataset                       | fine   | medium | coarse | a_t_b_f | a_f_b_t | a_t_b_t | b_t_c_f | b_f_c_t | b_t_c_t | c_t_a_f | c_f_a_t | c_t_a_t |
|-----|-------------------------------|--------|--------|--------|---------|---------|---------|---------|---------|---------|---------|---------|---------|
| 1   | ACSF1                         | 0.4380 | 0.5400 | 0.5000 | 0       | 10      | 44      | 6       | 2       | 48      | 7       | 1       | 43      |
| 2   | Adiac                         | 0.0179 | 0.1857 | 0.2517 | 2       | 68      | 5       | 1       | 26      | 72      | 93      | 2       | 5       |
| 3   | AllGestureWimoteX             | 0.3714 | 0.4643 | 0.4683 | 31      | 96      | 229     | 16      | 19      | 309     | 99      | 31      | 229     |
| 4   | AllGestureWimoteY             | 0.3514 | 0.4494 | 0.4603 | 32      | 101     | 214     | 13      | 21      | 302     | 115     | 39      | 207     |
| 5   | AllGestureWimoteZ             | 0.3429 | 0.4494 | 0.4829 | 20      | 94      | 220     | 17      | 41      | 297     | 127     | 29      | 211     |
| 6   | ArrowHead                     | 0.3531 | 0.3760 | 0.3920 | 13      | 17      | 48      | 1       | 4       | 65      | 20      | 13      | 48      |
| 7   | BME                           | 0.4867 | 0.5000 | 0.4933 | 0       | 2       | 73      | 2       | 1       | 73      | 2       | 1       | 72      |
| 8   | Beef                          | 0.2000 | 0.2000 | 0.2333 | 1       | 1       | 5       | 0       | 1       | 6       | 2       | 1       | 5       |
| 9   | BeetleFly                     | 0.4000 | 0.4500 | 0.4000 | 2       | 3       | 6       | 3       | 2       | 6       | 0       | 0       | 8       |
| 10  | BirdChicken                   | 0.8000 | 0.8000 | 0.7500 | 0       | 0       | 16      | 1       | 0       | 15      | 0       | 1       | 15      |
| 11  | CBF                           | 0.7727 | 0.9398 | 0.9422 | 42      | 192     | 653     | 2       | 4       | 844     | 194     | 41      | 654     |
| 12  | Car                           | 0.4000 | 0.4433 | 0.4400 | 4       | 7       | 20      | 5       | 4       | 22      | 9       | 7       | 17      |
| 13  | Chinatown                     | 0.5681 | 0.6841 | 0.6725 | 10      | 50      | 186     | 16      | 12      | 220     | 58      | 22      | 174     |
| 14  | ChlorineConcentration         | 0.5141 | 0.5090 | 0.5110 | 198     | 178     | 1776    | 15      | 23      | 1940    | 195     | 207     | 1767    |
| 15  | CinCECGTorso                  | 0.3372 | 0.3342 | 0.3290 | 114     | 109     | 352     | 28      | 21      | 433     | 119     | 131     | 335     |
| 16  | Colo                          | 0.5357 | 0.5357 | 0.5357 | 0       | 0       | 25      | 0       | 0       | 15      | 0       | 0       | 15      |
| 17  | Computers                     | 0.5120 | 0.4976 | 0.4880 | 7       | 3       | 121     | 3       | 1       | 121     | 3       | 9       | 119     |
| 18  | CricketX                      | 0.2744 | 0.3431 | 0.3585 | 10      | 37      | 97      | 12      | 18      | 122     | 52      | 19      | 88      |
| 19  | CricketY                      | 0.2533 | 0.3318 | 0.3472 | 32      | 62      | 67      | 14      | 20      | 116     | 78      | 42      | 57      |
| 20  | CricketZ                      | 0.2154 | 0.3554 | 0.3549 | 9       | 64      | 75      | 11      | 10      | 128     | 71      | 17      | 67      |
| 21  | Crop                          | 0.4823 | 0.5471 | 0.5557 | 578     | 1666    | 7325    | 358     | 503     | 8833    | 1956    | 72      | 7380    |
| 22  | DiatomSizeReduction           | 0.5850 | 0.5850 | 0.5850 | 0       | 0       | 179     | 0       | 0       | 179     | 0       | 0       | 179     |
| 23  | DistalPhalnxOutlineAgeGroup   | 0.4676 | 0.4676 | 0.4676 | 0       | 0       | 65      | 0       | 0       | 65      | 0       | 0       | 65      |
| 24  | DistalPhalnxOutlineCorrect    | 0.6043 | 0.5942 | 0.5964 | 7       | 4       | 160     | 1       | 2       | 163     | 6       | 8       | 159     |
| 25  | DistalPhalnxTW                | 0.6691 | 0.6921 | 0.6403 | 6       | 9       | 87      | 8       | 1       | 88      | 10      | 14      | 79      |
| 26  | DodgerLoopDay                 | 0.2325 | 0.3500 | 0.3350 | 1       | 10      | 18      | 2       | 1       | 26      | 8       | 0       | 18      |
| 27  | DodgerLoopGame                | 0.5623 | 0.7362 | 0.7478 | 7       | 11      | 70      | 2       | 3       | 100     | 34      | 8       | 69      |
| 28  | DodgerLoopWeekend             | 0.7826 | 0.8261 | 0.6783 | 1       | 7       | 107     | 20      | 0       | 94      | 1       | 16      | 92      |
| 29  | ECG200                        | 0.6280 | 0.6360 | 0.6100 | 0       | 1       | 63      | 4       | 1       | 60      | 2       | 4       | 59      |
| 30  | ECG500                        | 0.8978 | 0.8909 | 0.8918 | 51      | 20      | 3989    | 5       | 9       | 4004    | 23      | 50      | 3990    |
| 31  | ECGFiveDays                   | 0.5029 | 0.5145 | 0.5419 | 1       | 11      | 432     | 51      | 75      | 392     | 85      | 51      | 382     |
| 32  | EOCHorizomtalSignal           | 0.3354 | 0.4006 | 0.4232 | 13      | 37      | 108     | 9       | 17      | 136     | 40      | 8       | 113     |
| 33  | EOGVerticalSignal             | 0.3033 | 0.3271 | 0.3481 | 11      | 20      | 99      | 6       | 14      | 112     | 31      | 15      | 95      |
| 34  | Earthquakes                   | 0.7482 | 0.7482 | 0.7482 | 0       | 0       | 104     | 0       | 0       | 104     | 0       | 0       | 104     |
| 35  | ElectricDevices               | 0.6258 | 0.5982 | 0.5976 | 334     | 121     | 4492    | 126     | 122     | 4486    | 210     | 428     | 4398    |
| 36  | EthanolLevel                  | 0.2480 | 0.3632 | 0.4076 | 107     | 164     | 17      | 16      | 38      | 166     | 190     | 110     | 14      |
| 37  | FaceAll                       | 0.4463 | 0.4531 | 0.4574 | 48      | 60      | 706     | 35      | 42      | 731     | 79      | 61      | 694     |
| 38  | FaceFour                      | 0.4545 | 0.4614 | 0.5773 | 2       | 3       | 38      | 3       | 14      | 37      | 14      | 3       | 37      |
| 39  | FacesUCR                      | 0.3937 | 0.4758 | 0.4802 | 73      | 241     | 734     | 68      | 77      | 908     | 272     | 94      | 713     |
| 40  | FiftyWords                    | 0.1934 | 0.2901 | 0.3090 | 5       | 49      | 83      | 14      | 23      | 118     | 63      | 10      | 78      |
| 41  | Fish                          | 0.1371 | 0.3406 | 0.4457 | 5       | 41      | 19      | 1       | 19      | 59      | 60      | 6       | 18      |
| 42  | FordA                         | 0.8623 | 0.8608 | 0.8659 | 14      | 12      | 1124    | 5       | 12      | 1131    | 24      | 19      | 1119    |
| 43  | FordB                         | 0.5914 | 0.5916 | 0.6020 | 6       | 7       | 473     | 2       | 10      | 477     | 17      | 7       | 472     |
| 44  | FreezerRegularTrain           | 0.7446 | 0.7595 | 0.7544 | 21      | 64      | 2101    | 46      | 31      | 2119    | 69      | 41      | 2081    |
| 45  | FreezerSmallTrain             | 0.5000 | 0.4947 | 0.4996 | 17      | 2       | 1408    | 3       | 17      | 1407    | 0       | 1       | 1424    |
| 46  | Fungi                         | 0.1022 | 0.3226 | 0.2903 | 9       | 50      | 10      | 26      | 20      | 34      | 42      | 7       | 12      |
| 47  | GestureMidAirD1               | 0.1692 | 0.3385 | 0.4323 | 2       | 24      | 20      | 6       | 18      | 38      | 39      | 5       | 17      |
| 48  | GestureMidAirD2               | 0.1462 | 0.2785 | 0.2846 | 1       | 18      | 18      | 8       | 9       | 28      | 22      | 4       | 15      |
| 49  | GestureMidAirD3               | 0.1154 | 0.1385 | 0.1538 | 2       | 5       | 13      | 3       | 5       | 15      | 8       | 3       | 12      |
| 50  | GesturePebbleZ1               | 0.3605 | 0.2942 | 0.2988 | 19      | 8       | 43      | 3       | 3       | 48      | 10      | 21      | 41      |
| 51  | GesturePebbleZ2               | 0.5190 | 0.5013 | 0.4899 | 13      | 10      | 69      | 5       | 4       | 74      | 8       | 13      | 69      |
| 52  | GunPoint                      | 0.5067 | 0.5933 | 0.5667 | 0       | 13      | 76      | 4       | 0       | 85      | 0       | 0       | 76      |
| 53  | GunPointAgeSpan               | 0.5057 | 0.4937 | 0.5671 | 33      | 29      | 127     | 2       | 25      | 154     | 30      | 11      | 149     |
| 54  | GunPointMaleVersusFemale      | 0.8544 | 0.8165 | 0.8165 | 12      | 37      | 258     | 4       | 0       | 258     | 0       | 0       | 258     |
| 55  | GunPointOldVersusYoung        | 1.0000 | 0.9524 | 0.8279 | 15      | 0       | 300     | 48      | 9       | 252     | 0       | 54      | 261     |
| 56  | Ham                           | 0.5143 | 0.5524 | 0.5143 | 2       | 6       | 52      | 6       | 2       | 52      | 0       | 0       | 54      |
| 57  | HandOutlines                  | 0.6589 | 0.6097 | 0.5865 | 37      | 19      | 206     | 26      | 17      | 200     | 36      | 63      | 181     |
| 58  | Haptics                       | 0.2292 | 0.3325 | 0.3162 | 30      | 62      | 40      | 8       | 3       | 94      | 60      | 34      | 37      |
| 59  | Herring                       | 0.4062 | 0.4531 | 0.4375 | 1       | 4       | 25      | 2       | 1       | 27      | 3       | 1       | 25      |
| 60  | HouseTwenty                   | 0.8756 | 0.9076 | 0.9076 | 4       | 8       | 100     | 1       | 1       | 107     | 8       | 4       | 100     |
| 61  | InlineSkate                   | 0.1636 | 0.2302 | 0.2509 | 45      | 82      | 45      | 30      | 42      | 96      | 112     | 64      | 26      |
| 62  | InsectEPRRegularTrain         | 1.0000 | 1.0000 | 1.0000 | 0       | 0       | 249     | 0       | 0       | 249     | 0       | 0       | 249     |
| 63  | InsectEPGSmallTrain           | 0.5606 | 0.5261 | 0.3574 | 14      | 5       | 126     | 42      | 0       | 89      | 5       | 56      | 84      |
| 64  | InsectWingbeatSound           | 0.1376 | 0.2653 | 0.2631 | 70      | 323     | 202     | 109     | 105     | 416     | 351     | 103     | 170     |
| 65  | ItalyPowerDemand              | 0.8707 | 0.8688 | 0.8698 | 14      | 16      | 880     | 5       | 6       | 889     | 18      | 19      | 877     |
| 66  | LargeKitchenAppliances        | 0.5973 | 0.5600 | 0.5552 | 19      | 5       | 205     | 4       | 2       | 206     | 6       | 22      | 202     |
| 67  | Lightning2                    | 0.6557 | 0.6230 | 0.6066 | 4       | 2       | 36      | 2       | 1       | 36      | 2       | 5       | 35      |
| 68  | Lightning7                    | 0.4247 | 0.4110 | 0.4164 | 6       | 5       | 25      | 0       | 0       | 30      | 5       | 6       | 25      |
| 69  | Mallat                        | 0.2473 | 0.4583 | 0.4443 | 199     | 693     | 381     | 56      | 23      | 1018    | 678     | 216     | 364     |
| 70  | Meat                          | 0.5700 | 0.6167 | 0.5833 | 0       | 3       | 34      | 2       | 0       | 35      | 1       | 0       | 34      |
| 71  | MedicalImages                 | 0.4997 | 0.5987 | 0.5966 | 23      | 98      | 357     | 20      | 19      | 435     | 105     | 32      | 348     |
| 72  | MelbournePedestrian           | 0.6867 | 0.6840 | 0.6741 | 24      | 18      | 1658    | 31      | 7       | 1645    | 20      | 50      | 1632    |
| 73  | MiddlePhalnxOutlineAgeGroup   | 0.1883 | 0.1623 | 0.1792 | 5       | 1       | 24      | 2       | 5       | 23      | 6       | 7       | 22      |
| 74  | MiddlePhalnxOutlineCorrect    | 0.5704 | 0.5883 | 0.6014 | 0       | 5       | 166     | 1       | 5       | 170     | 10      | 1       | 165     |
| 75  | MiddlePhalnxTW                | 0.5675 | 0.4727 | 0.4740 | 22      | 8       | 65      | 1       | 1       | 72      | 8       | 22      | 65      |
| 76  | MixedShapesRegularTrain       | 0.6712 | 0.6626 | 0.6609 | 85      | 64      | 1543    | 26      | 22      | 1581    | 82      | 107     | 1521    |
| 77  | MixedShapesSmallTrain         | 0.2851 | 0.3651 | 0.4049 | 15      | 209     | 676     | 28      | 125     | 857     | 332     | 42      | 649     |
| 78  | MoteStrain                    | 0.4609 | 0.4609 | 0.4609 | 0       | 0       | 577     | 0       | 0       | 577     | 0       | 0       | 577     |
| 79  | NonInvasiveFetalECGThorax1    | 0.0244 | 0.4365 | 0.5565 | 1       | 811     | 47      | 15      | 251     | 843     | 1047    | 1       | 47      |
| 80  | NonInvasiveFetalECGThorax2    | 0.0461 | 0.4595 | 0.5502 | 1       | 813     | 90      | 20      | 198     | 883     | 992     | 1       | 90      |
| 81  | OSLLeaf                       | 0.7545 | 0.7248 | 0.7289 | 9       | 1       | 174     | 4       | 5       | 171     | 4       | 10      | 172     |
| 82  | OliveOil                      | 0.4000 | 0.4333 | 0.4000 | 1       | 2       | 11      | 1       | 0       | 12      | 4       | 2       | 11      |
| 83  | PLAID                         | 0.2127 | 0.1534 | 0.1844 | 48      | 16      | 66      | 23      | 40      | 59      | 49      | 64      | 50      |
| 84  | PhalngesOutlinesCorrect       | 0.6410 | 0.6522 | 0.6643 | 13      | 23      | 537     | 5       | 15      | 555     | 35      | 15      | 535     |
| 85  | Phoneme                       | 0.2013 | 0.1972 | 0.1963 | 91      | 84      | 290     | 55      | 53      | 319     | 96      | 105     | 277     |
| 86  | PickupGestureWimoteZ          | 0.2600 | 0.5000 | 0.4920 | 1       | 13      | 12      | 2       | 2       | 23      | 14      | 2       | 11      |
| 87  | PigAirwayPressure             | 0.1058 | 0.0894 | 0.1259 | 11      | 7       | 11      | 5       | 15      | 12      | 5       | 12      | 22      |
| 88  | PigArtPressure                | 0.0625 | 0.2077 | 0.3038 | 7       | 37      | 6       | 5       | 25      | 38      | 52      | 2       | 11      |
| 89  | PigCVP                        | 0.0337 | 0.0692 | 0.1433 | 4       | 11      | 3       | 4       | 20      | 10      | 26      | 3       | 4       |
| 90  | Plane                         | 0.4952 | 0.4952 | 0.4952 | 0       | 0       | 52      | 0       | 0       | 52      | 0       | 0       | 52      |
| 91  | PowerCons                     | 0.6578 | 0.6278 | 0.6356 | 8       | 3       | 110     | 2       | 3       | 111     | 1       | 5       | 113     |
| 92  | ProximalPhalnxOutlineAgeGroup | 0.7463 | 0.7395 | 0.7171 | 7       | 5       | 146     | 5       | 0       | 147     | 5       | 11      | 146     |
| 93  | ProximalPhalnxOutlineCorrect  | 0.6838 | 0.7223 | 0.7203 | 6       | 17      | 193     | 10      | 9       | 201     | 26      | 16      | 183     |
| 94  | ProximalPhalnxTW              | 0.5463 | 0.6537 | 0.6839 | 0       | 22      | 112     | 5       | 11      | 129     | 33      | 5       | 107     |
| 95  | RefrigerationDevices          | 0.3995 | 0.4107 | 0.3947 | 11      | 15      | 139     | 8       | 2       | 146     | 15      | 17      | 133     |
| 96  | Rock                          | 0.3000 | 0.3000 | 0.3800 | 1       | 1       | 14      | 1       | 5       | 14      | 6       | 2       | 13      |
| 97  | ScreenType                    | 0.3733 | 0.3483 | 0.3424 | 17      | 8       | 123     | 8       | 6       | 122     | 11      | 22      | 118     |
| 98  | SemgHandGenderCh2             | 0.6227 | 0.6137 | 0.6227 | 13      | 8       | 361     | 8       | 14      | 360     | 12      | 12      | 361     |
| 99  | SemgHandMovementCh2           | 0.3733 | 0.4120 | 0.4089 | 14      | 32      | 154     | 16      | 14      | 170     | 44      | 28      | 140     |
| 100 | SemgHandSubjectCh2            | 0.3542 | 0.3791 | 0.4107 | 14      | 25      | 145     | 4       | 18      | 167     | 39      | 14      | 145     |
| 101 | ShakeGestureWimoteZ           | 0.3400 | 0.5800 | 0.5200 | 1       | 13      | 16      | 3       | 0       | 26      | 10      | 1       | 16      |
| 102 | ShapeletSim                   | 0.5000 | 0.5000 | 0.5000 | 0       | 0       | 90      | 0       | 0       | 90      | 0       | 0       | 90      |
| 103 | ShapesAll                     | 0.0633 | 0.4350 | 0.4900 | 2       | 225     | 36      | 23      | 56      | 238     | 259     | 3       | 35      |
| 104 | SmallKitchenAppliances        | 0.6971 | 0.6939 | 0.6901 | 15      | 14      | 246     | 5       | 3       | 256     | 15      | 17      | 244     |
| 105 | SmoothSubspace                | 0.7067 | 0.7467 | 0.7387 | 3       | 9       | 103     |         |         |         |         |         |         |

Table 18: Multi-scale analysis of w/o cross-scale fusion based on Scale-teaching using UCR 128 archive with Asym 40% noisy labels.

| ID  | Dataset                        | fine   | medium | coarse | a_t_b_f | a_f_b_t | a_t_b_t | b_t_c_f | b_f_c_t | b_t_c_t | c_t_a_f | c_f_a_t | c_t_a_t |
|-----|--------------------------------|--------|--------|--------|---------|---------|---------|---------|---------|---------|---------|---------|---------|
| 1   | ACSF1                          | 0.6000 | 0.0100 | 0.3000 | 59      | 0       | 1       | 1       | 30      | 0       | 1       | 31      | 29      |
| 2   | Adiac                          | 0.0665 | 0.0588 | 0.0205 | 22      | 19      | 4       | 23      | 8       | 0       | 8       | 26      | 0       |
| 3   | AllGestureWimoteX              | 0.3863 | 0.0917 | 0.0923 | 247     | 41      | 23      | 35      | 35      | 29      | 47      | 253     | 17      |
| 4   | AllGestureWimoteY              | 0.4200 | 0.1354 | 0.0383 | 227     | 28      | 67      | 83      | 15      | 12      | 21      | 288     | 6       |
| 5   | AllGestureWimoteZ              | 0.3811 | 0.1000 | 0.0894 | 208     | 11      | 59      | 50      | 42      | 20      | 38      | 242     | 25      |
| 6   | ArrowHead                      | 0.5097 | 0.3029 | 0.3029 | 89      | 53      | 0       | 53      | 53      | 0       | 1       | 37      | 52      |
| 7   | BME                            | 0.4867 | 0.3333 | 0.1387 | 23      | 0       | 50      | 49      | 20      | 1       | 20      | 72      | 1       |
| 8   | Beef                           | 0.2333 | 0.2000 | 0.1867 | 7       | 6       | 0       | 6       | 6       | 0       | 1       | 2       | 5       |
| 9   | BeetleFly                      | 0.4000 | 0.5000 | 0.5000 | 7       | 9       | 1       | 0       | 10      | 9       | 7       | 1       | 1       |
| 10  | BirdChicken                    | 0.6000 | 0.5000 | 0.5000 | 8       | 6       | 4       | 0       | 0       | 10      | 6       | 8       | 4       |
| 11  | CBF                            | 0.5589 | 0.3311 | 0.3311 | 205     | 0       | 298     | 0       | 0       | 298     | 0       | 205     | 298     |
| 12  | Car                            | 0.4000 | 0.2533 | 0.1200 | 23      | 14      | 1       | 15      | 7       | 0       | 3       | 20      | 4       |
| 13  | Chinatown                      | 0.5275 | 0.7275 | 0.7246 | 4       | 73      | 178     | 2       | 1       | 249     | 74      | 6       | 176     |
| 14  | ChlorineConcentration          | 0.4660 | 0.3694 | 0.5380 | 904     | 533     | 885     | 399     | 1046    | 1020    | 769     | 493     | 1297    |
| 15  | CinCECGTorso                   | 0.3338 | 0.1733 | 0.2696 | 455     | 233     | 6       | 233     | 366     | 6       | 43      | 131     | 329     |
| 16  | Coffee                         | 0.5357 | 0.4643 | 0.4643 | 15      | 13      | 0       | 0       | 0       | 13      | 13      | 15      | 0       |
| 17  | Computers                      | 0.5024 | 0.4840 | 0.5000 | 8       | 3       | 118     | 1       | 5       | 120     | 2       | 3       | 123     |
| 18  | CricketX                       | 0.2790 | 0.0974 | 0.1308 | 73      | 2       | 36      | 38      | 51      | 0       | 47      | 105     | 4       |
| 19  | CricketY                       | 0.2738 | 0.1077 | 0.1149 | 83      | 18      | 24      | 42      | 45      | 0       | 35      | 97      | 10      |
| 20  | CricketZ                       | 0.2144 | 0.1364 | 0.1590 | 61      | 30      | 23      | 53      | 62      | 0       | 31      | 52      | 31      |
| 21  | Crop                           | 0.4882 | 0.0619 | 0.0342 | 7332    | 170     | 870     | 1040    | 574     | 0       | 386     | 8014    | 188     |
| 22  | DiatomSizeReduction            | 0.3007 | 0.0974 | 0.3497 | 92      | 30      | 0       | 13      | 90      | 17      | 107     | 92      | 0       |
| 23  | DistalPhalanxOutlineAgeGroup   | 0.6619 | 0.3655 | 0.5324 | 58      | 17      | 34      | 42      | 65      | 9       | 20      | 38      | 54      |
| 24  | DistalPhalanxOutlineCorrect    | 0.5333 | 0.5978 | 0.1833 | 38      | 56      | 109     | 9       | 5       | 156     | 61      | 47      | 100     |
| 25  | DistalPhalanxTW                | 0.6763 | 0.2806 | 0.3525 | 25      | 0       | 39      | 0       | 10      | 39      | 0       | 45      | 49      |
| 26  | DodgerLoopDay                  | 0.2700 | 0.1075 | 0.1625 | 13      | 0       | 8       | 0       | 4       | 9       | 1       | 10      | 12      |
| 27  | DodgerLoopGame                 | 0.5290 | 0.4783 | 0.4783 | 72      | 65      | 1       | 0       | 0       | 66      | 65      | 72      | 1       |
| 28  | DodgerLoopWeekend              | 0.7739 | 0.2609 | 0.2609 | 72      | 1       | 35      | 0       | 0       | 36      | 1       | 72      | 35      |
| 29  | ECCG200                        | 0.6700 | 0.6400 | 0.6400 | 15      | 12      | 52      | 0       | 0       | 64      | 12      | 15      | 52      |
| 30  | ECCG500                        | 0.8888 | 0.1998 | 0.0191 | 3115    | 14      | 885     | 897     | 84      | 2       | 86      | 4000    | 0       |
| 31  | ECGFiveDays                    | 0.5970 | 0.5029 | 0.5029 | 283     | 202     | 231     | 0       | 0       | 433     | 202     | 283     | 231     |
| 32  | EOGHorizontalSignal            | 0.3138 | 0.0961 | 0.1320 | 96      | 17      | 18      | 35      | 48      | 0       | 13      | 78      | 35      |
| 33  | EOGVerticalSignal              | 0.2873 | 0.0746 | 0.0801 | 84      | 7       | 20      | 20      | 22      | 7       | 25      | 100     | 4       |
| 34  | Earthquakes                    | 0.7482 | 0.2518 | 0.2518 | 104     | 35      | 0       | 0       | 0       | 35      | 35      | 104     | 0       |
| 35  | ElectricDevices                | 0.6009 | 0.0691 | 0.1126 | 4578    | 477     | 56      | 533     | 868     | 0       | 487     | 4253    | 381     |
| 36  | EthanolLevel                   | 0.2528 | 0.2520 | 0.2544 | 56      | 56      | 70      | 125     | 70      | 1       | 71      | 70      | 56      |
| 37  | FaceAll                        | 0.5088 | 0.0677 | 0.0182 | 795     | 50      | 64      | 114     | 0       | 0       | 6       | 834     | 27      |
| 38  | FaceFour                       | 0.4705 | 0.0000 | 0.2045 | 41      | 0       | 0       | 0       | 18      | 0       | 4       | 27      | 14      |
| 39  | FacesUCR                       | 0.4839 | 0.1740 | 0.0062 | 661     | 26      | 331     | 357     | 13      | 0       | 3       | 982     | 10      |
| 40  | FiftyWords                     | 0.2382 | 0.1253 | 0.0659 | 77      | 26      | 31      | 57      | 30      | 0       | 22      | 100     | 8       |
| 41  | Fish                           | 0.4583 | 0.0834 | 0.1314 | 66      | 0       | 15      | 15      | 23      | 0       | 19      | 76      | 4       |
| 42  | FordA                          | 0.8917 | 0.7006 | 0.4932 | 365     | 113     | 812     | 289     | 15      | 635     | 111     | 677     | 540     |
| 43  | FordB                          | 0.6407 | 0.5568 | 0.5049 | 112     | 44      | 407     | 51      | 9       | 400     | 53      | 163     | 356     |
| 44  | FreezerRegularTrain            | 0.6327 | 0.6138 | 0.5000 | 59      | 5       | 1744    | 482     | 157     | 1268    | 160     | 538     | 1265    |
| 45  | FreezerSmallTrain              | 0.5004 | 0.7038 | 0.5000 | 192     | 772     | 1234    | 773     | 192     | 1233    | 4       | 5       | 1421    |
| 46  | Fungi                          | 0.0968 | 0.0591 | 0.1290 | 7       | 0       | 11      | 0       | 13      | 11      | 13      | 7       | 0       |
| 47  | GestureMidAirD1                | 0.1769 | 0.0138 | 0.0385 | 23      | 2       | 0       | 1       | 4       | 1       | 2       | 20      | 3       |
| 48  | GestureMidAirD2                | 0.1708 | 0.0385 | 0.0462 | 17      | 0       | 5       | 5       | 6       | 0       | 5       | 21      | 1       |
| 49  | GestureMidAirD3                | 0.1385 | 0.0615 | 0.0431 | 15      | 5       | 3       | 5       | 3       | 3       | 4       | 16      | 2       |
| 50  | GesturePebbleZ1                | 0.4814 | 0.1802 | 0.1453 | 53      | 1       | 30      | 31      | 25      | 0       | 7       | 65      | 18      |
| 51  | GesturePebbleZ2                | 0.5089 | 0.0481 | 0.1861 | 73      | 0       | 7       | 7       | 29      | 0       | 10      | 61      | 19      |
| 52  | GunPoint                       | 0.6133 | 0.5973 | 0.4933 | 22      | 20      | 70      | 53      | 37      | 37      | 57      | 75      | 17      |
| 53  | GunPointMaleVersusFemale       | 0.8576 | 0.4342 | 0.4937 | 72      | 88      | 49      | 2       | 21      | 135     | 90      | 55      | 46      |
| 54  | GunPointOldVersusYoung         | 1.0000 | 0.6540 | 0.5238 | 109     | 0       | 206     | 41      | 0       | 165     | 0       | 150     | 165     |
| 55  | Ham                            | 0.4381 | 0.5143 | 0.5143 | 20      | 28      | 26      | 0       | 0       | 54      | 28      | 20      | 26      |
| 57  | HandOutlines                   | 0.6200 | 0.6546 | 0.6405 | 104     | 117     | 126     | 5       | 0       | 237     | 117     | 109     | 120     |
| 58  | Haptics                        | 0.2591 | 0.2292 | 0.2338 | 67      | 58      | 13      | 70      | 71      | 1       | 20      | 28      | 52      |
| 59  | Herring                        | 0.4688 | 0.4062 | 0.4062 | 5       | 1       | 25      | 0       | 0       | 26      | 1       | 5       | 5       |
| 60  | HouseTwenty                    | 0.6353 | 0.4034 | 0.4202 | 28      | 1       | 47      | 0       | 2       | 48      | 1       | 26      | 49      |
| 61  | InlineSkate                    | 0.2073 | 0.1691 | 0.1873 | 109     | 88      | 5       | 44      | 54      | 49      | 88      | 99      | 15      |
| 62  | InsectEPGRegularTrain          | 1.0000 | 0.4739 | 0.6426 | 131     | 0       | 118     | 0       | 42      | 118     | 0       | 89      | 160     |
| 63  | InsectEPGSmallTrain            | 0.5719 | 0.4739 | 0.1837 | 131     | 107     | 11      | 118     | 42      | 0       | 100     | 42      | 0       |
| 64  | InsectWingbeatSound            | 0.1622 | 0.0962 | 0.1158 | 283     | 152     | 39      | 177     | 222     | 14      | 133     | 219     | 212     |
| 65  | ItalyPowerDemand               | 0.9261 | 0.5015 | 0.5015 | 463     | 26      | 490     | 0       | 0       | 516     | 26      | 463     | 490     |
| 66  | LargeKitchenAppliances         | 0.6016 | 0.3557 | 0.2224 | 105     | 12      | 121     | 118     | 68      | 15      | 25      | 167     | 58      |
| 67  | Lightning2                     | 0.6393 | 0.5410 | 0.5410 | 15      | 9       | 24      | 0       | 0       | 33      | 9       | 15      | 24      |
| 68  | Lightning7                     | 0.3836 | 0.2575 | 0.2466 | 23      | 14      | 5       | 3       | 2       | 16      | 15      | 25      | 3       |
| 69  | Mallat                         | 0.2479 | 0.1243 | 0.0198 | 581     | 291     | 1       | 276     | 30      | 16      | 46      | 581     | 0       |
| 70  | Meat                           | 0.6000 | 0.3333 | 0.3167 | 20      | 4       | 16      | 1       | 0       | 19      | 3       | 20      | 16      |
| 71  | MedicalImages                  | 0.5503 | 0.4468 | 0.2171 | 99      | 21      | 319     | 234     | 59      | 106     | 61      | 314     | 104     |
| 72  | MelbournePedestrian            | 0.7768 | 0.0600 | 0.0199 | 1772    | 16      | 131     | 133     | 35      | 14      | 15      | 1869    | 34      |
| 73  | MiddlePhalanxOutlineAgeGroup   | 0.6169 | 0.5714 | 0.2143 | 7       | 0       | 88      | 84      | 29      | 4       | 22      | 84      | 11      |
| 74  | MiddlePhalanxOutlineCorrect    | 0.6220 | 0.5918 | 0.5704 | 17      | 8       | 164     | 7       | 1       | 165     | 9       | 24      | 157     |
| 75  | MiddlePhalanxTW                | 0.5065 | 0.1494 | 0.1455 | 63      | 4       | 145     | 6       | 16      | 12      | 68      | 16      | 0       |
| 76  | MixedShapesRegularTrain        | 0.7980 | 0.0851 | 0.1298 | 1735    | 6       | 200     | 206     | 315     | 0       | 7       | 1627    | 308     |
| 77  | MixedShapesSmallTrain          | 0.4144 | 0.1195 | 0.2501 | 997     | 282     | 8       | 286     | 603     | 4       | 23      | 422     | 583     |
| 78  | MoteStrain                     | 0.4609 | 0.4612 | 0.4609 | 2       | 2       | 575     | 2       | 2       | 575     | 0       | 0       | 577     |
| 79  | NonInvasiveFetalECGThorax1     | 0.1186 | 0.0214 | 0.0422 | 192     | 1       | 41      | 42      | 83      | 0       | 40      | 190     | 43      |
| 80  | NonInvasiveFetalECGThorax2     | 0.1445 | 0.0261 | 0.0453 | 233     | 0       | 51      | 51      | 89      | 0       | 1       | 196     | 88      |
| 81  | OSULeaf                        | 0.6901 | 0.1694 | 0.0950 | 129     | 3       | 38      | 38      | 18      | 5       | 4       | 148     | 19      |
| 82  | OliveOil                       | 0.4000 | 0.4000 | 0.4000 | 0       | 0       | 12      | 0       | 0       | 12      | 0       | 0       | 12      |
| 83  | PLAID                          | 0.2134 | 0.1088 | 0.1233 | 74      | 18      | 41      | 13      | 21      | 46      | 27      | 76      | 39      |
| 84  | PhalangesOutlinesCorrect       | 0.6452 | 0.6142 | 0.6131 | 145     | 119     | 408     | 1       | 0       | 526     | 119     | 146     | 407     |
| 85  | Phoneme                        | 0.1786 | 0.0188 | 0.0179 | 336     | 33      | 2       | 35      | 33      | 1       | 30      | 335     | 4       |
| 86  | PickupGestureWimoteZ           | 0.1320 | 0.0360 | 0.2680 | 7       | 0       | 2       | 13      | 0       | 2       | 13      | 0       | 2       |
| 87  | PigAirwayPressure              | 0.0788 | 0.0096 | 0.0192 | 16      | 2       | 0       | 0       | 2       | 2       | 4       | 16      | 0       |
| 88  | PigArtPressure                 | 0.0894 | 0.0192 | 0.0192 | 15      | 0       | 4       | 4       | 4       | 0       | 0       | 15      | 4       |
| 89  | PigCVP                         | 0.0577 | 0.0192 | 0.0337 | 9       | 1       | 3       | 4       | 7       | 0       | 4       | 9       | 3       |
| 90  | Plane                          | 0.4952 | 0.2152 | 0.1733 | 40      | 11      | 12      | 11      | 7       | 12      | 6       | 40      | 12      |
| 91  | PowerCVP                       | 0.5333 | 0.5000 | 0.5056 | 61      | 46      | 44      | 6       | 1       | 90      | 46      | 66      | 45      |
| 92  | ProximalPhalanxOutlineAgeGroup | 0.7844 | 0.4098 | 0.5122 | 98      | 21      | 63      | 81      | 102     | 3       | 9       | 65      | 99      |
| 93  | ProximalPhalanxOutlineCorrect  | 0.7491 | 0.6838 | 0.6838 | 23      | 4       | 195     | 0       | 0       | 199     | 4       | 23      | 195     |
| 94  | ProximalPhalanxTW              | 0.7873 | 0.1951 | 0.1863 | 130     | 9       | 31      | 33      | 31      | 7       | 9       | 132     | 29      |
| 95  | RefrigerationDevices           | 0.4299 | 0.3333 | 0.3333 | 112     | 76      | 49      | 125     | 0       | 89      | 125     | 36      | 0       |
| 96  | Rock                           | 0.4800 | 0.3000 | 0.1800 | 15      | 6       | 9       | 14      | 8       | 1       | 7       | 22      | 2       |
| 97  | ScreenType                     | 0.3899 | 0.3333 | 0.3280 | 65      | 44      | 81      | 92      | 90      | 33      | 97      | 121     | 26      |
| 98  | SemgHandGenderCh2              | 0.6033 | 0.3500 | 0.3777 | 230     | 78      | 132     | 0       | 17      | 210     | 78      | 213     | 149     |
| 99  | SemgHandMovementCh2            | 0.3409 | 0.1702 | 0.1236 | 109     | 33      | 44      | 77      | 56      | 0       | 25      | 122     | 31      |
| 100 | SemgHandSubjectCh2             | 0.2933 | 0.1418 | 0.2298 | 125     | 57      | 7       | 64      | 103     | 0       | 42      | 71      | 61      |
| 101 | ShakeGestureWimoteZ            | 0.2200 | 0.1400 | 0.1400 | 6       | 2       | 5       | 7       | 7       | 0       | 7       | 11      | 0       |
| 102 | ShapesAll                      | 0.5000 | 0.5000 | 0.5000 | 90      | 0       | 0       | 0       | 90      | 90      | 90      | 90      | 0       |
| 103 | ShapesAll                      | 0.2513 | 0.0280 | 0.0133 | 139     | 5       | 12      | 17      | 8       | 0       | 1       | 144     | 7       |
| 104 | SmallKitchenAppliances         | 0.6816 | 0.3333 | 0.2912 | 213     | 82      | 43      | 94      | 78      | 31      | 47      | 194     | 62      |
| 105 | SmoothSubspace                 | 0.6133 | 0.3333 | 0.2933 | 59      | 17      | 33      | 46      | 40      | 4       | 23      | 71      | 21      |
| 106 | SonyAIBORobotSurface1          | 0.5990 | 0.4293 | 0.4293 | 132     | 30      | 228     |         |         |         |         |         |         |

## References

- [1] Xian-Jin Gui, Wei Wang, and Zhang-Hao Tian. Towards understanding deep learning from noisy labels with small-loss criterion. *arXiv preprint arXiv:2106.09291*, 2021.
- [2] Emadeldeen Eldele, Mohamed Ragab, Zhenghua Chen, Min Wu, Chee Keong Kwoh, Xiaoli Li, and Cuntai Guan. Time-series representation learning via temporal and contextual contrasting. *arXiv preprint arXiv:2106.14112*, 2021.
- [3] Davide Anguita, Alessandro Ghio, Luca Oneto, Xavier Parra Perez, and Jorge Luis Reyes Ortiz. A public domain dataset for human activity recognition using smartphones. In *Proceedings of the 21th international European symposium on artificial neural networks, computational intelligence and machine learning*, pages 437–442, 2013.
- [4] Gentry Atkinson and Vangelis Metsis. Tsar: a time series assisted relabeling tool for reducing label noise. In *The 14th PErvasive Technologies Related to Assistive Environments Conference*, pages 203–209, 2021.
- [5] Daniela Micucci, Marco Mobilio, and Paolo Napoletano. Unimib shar: A dataset for human activity recognition using acceleration data from smartphones. *Applied Sciences*, 7(10):1101, 2017.
- [6] Christian Lessmeier, James Kuria Kimotho, Detmar Zimmer, and Walter Sextro. Condition monitoring of bearing damage in electromechanical drive systems by using motor current signals of electric motors: A benchmark data set for data-driven classification. In *PHM Society European Conference*, volume 3, 2016.
- [7] Ralph G Andrzejak, Klaus Lehnertz, Florian Mormann, Christoph Rieke, Peter David, and Christian E Elger. Indications of nonlinear deterministic and finite-dimensional structures in time series of brain electrical activity: Dependence on recording region and brain state. *Physical Review E*, 64(6):061907, 2001.
- [8] Hoang Anh Dau, Anthony Bagnall, Kaveh Kamgar, Chin-Chia Michael Yeh, Yan Zhu, Shaghayegh Gharghabi, Chotirat Ann Ratanamahatana, and Eamonn Keogh. The ucr time series archive. *IEEE/CAA Journal of Automatica Sinica*, 6(6):1293–1305, 2019.
- [9] Anthony Bagnall, Hoang Anh Dau, Jason Lines, Michael Flynn, James Large, Aaron Bostrom, Paul Southam, and Eamonn Keogh. The uea multivariate time series classification archive, 2018. *arXiv preprint arXiv:1811.00075*, 2018.
- [10] Hongyi Zhang, Moustapha Cisse, Yann N Dauphin, and David Lopez-Paz. mixup: Beyond empirical risk minimization. *arXiv preprint arXiv:1710.09412*, 2017.
- [11] Bo Han, Quanming Yao, Xingrui Yu, Gang Niu, Miao Xu, Weihua Hu, Ivor Tsang, and Masashi Sugiyama. Co-teaching: Robust training of deep neural networks with extremely noisy labels. *Advances in neural information processing systems*, 31, 2018.
- [12] Taehyeon Kim, Jongwoo Ko, JinHwan Choi, Se-Young Yun, et al. Fine samples for learning with noisy labels. *Advances in Neural Information Processing Systems*, 34:24137–24149, 2021.
- [13] Andrea Castellani, Sebastian Schmitt, and Barbara Hammer. Estimating the electrical power output of industrial devices with end-to-end time-series classification in the presence of label noise. In *Joint European Conference on Machine Learning and Knowledge Discovery in Databases*, pages 469–484. Springer, 2021.
- [14] Yangdi Lu and Wenbo He. Selc: Self-ensemble label correction improves learning with noisy labels. *arXiv preprint arXiv:2205.01156*, 2022.
- [15] Xiaobo Xia, Tongliang Liu, Bo Han, Mingming Gong, Jun Yu, Gang Niu, and Masashi Sugiyama. Sample selection with uncertainty of losses for learning with noisy labels. In *International Conference on Learning Representations*, 2022.
- [16] Xingrui Yu, Bo Han, Jiangchao Yao, Gang Niu, Ivor Tsang, and Masashi Sugiyama. How does disagreement help generalization against label corruption? In *International Conference on Machine Learning*, pages 7164–7173. PMLR, 2019.

- [17] Nazmul Karim, Mamshad Nayeem Rizve, Nazanin Rahnavard, Ajmal Mian, and Mubarak Shah. Unicon: Combating label noise through uniform selection and contrastive learning. In *Proceedings of the IEEE/CVF Conference on Computer Vision and Pattern Recognition*, pages 9676–9686, 2022.
- [18] Laurens Van der Maaten and Geoffrey Hinton. Visualizing data using t-sne. *Journal of machine learning research*, 9(11), 2008.
- [19] Zipeng Chen, Qianli Ma, and Zhenxi Lin. Time-aware multi-scale rnns for time series modeling. In *IJCAI*, pages 2285–2291, 2021.
- [20] Tian Zhou, Ziqing Ma, Qingsong Wen, Liang Sun, Tao Yao, Rong Jin, et al. Film: Frequency improved legendre memory model for long-term time series forecasting. *arXiv preprint arXiv:2205.08897*, 2022.
- [21] Patrick Schäfer. The boss is concerned with time series classification in the presence of noise. *Data Mining and Knowledge Discovery*, 29:1505–1530, 2015.
- [22] Angus Dempster, François Petitjean, and Geoffrey I Webb. Rocket: exceptionally fast and accurate time series classification using random convolutional kernels. *Data Mining and Knowledge Discovery*, 34(5):1454–1495, 2020.
- [23] Zhiguang Wang, Weizhong Yan, and Tim Oates. Time series classification from scratch with deep neural networks: A strong baseline. In *2017 International joint conference on neural networks (IJCNN)*, pages 1578–1585. IEEE, 2017.
- [24] Hassan Ismail Fawaz, Germain Forestier, Jonathan Weber, Lhassane Idoumghar, and Pierre-Alain Muller. Deep learning for time series classification: a review. *Data mining and knowledge discovery*, 33(4):917–963, 2019.
- [25] Hassan Ismail Fawaz, Benjamin Lucas, Germain Forestier, Charlotte Pelletier, Daniel F Schmidt, Jonathan Weber, Geoffrey I Webb, Lhassane Idoumghar, Pierre-Alain Muller, and François Petitjean. Inceptiontime: Finding alexnet for time series classification. *Data Mining and Knowledge Discovery*, 34(6):1936–1962, 2020.
- [26] Wensi Tang, Guodong Long, Lu Liu, Tianyi Zhou, Michael Blumenstein, and Jing Jiang. Omni-scale cnns: a simple and effective kernel size configuration for time series classification. In *International Conference on Learning Representations*, 2022.
